# Supplementary material for: Exploring the Prominent and Concealed Inhibitory Features for Cytoplasmic Isoforms of Hsp90 Using QSAR Analysis
Source: Pharmaceuticals (Basel). 2022 Mar 1;15(3):303. doi: 10.3390/ph15030303 (PMC8953649; doi:10.3390/ph15030303)
Supplement: Supplementary file 1 [file pharmaceuticals-15-00303-s001.zip › Supplementary Material.xlsx]

## Sheet: Details Dataset
S.N. (Paper)	pIC50(M)	IC50 (nM)	Ligand SMILES	fClaroN2B	number of ringC	number of aroC	com_ringChyd_3A	com_ringChyd_5A	aroCplus_sumpc	com_ringChyd_4A	faroCN2B	fringNsp3C5B	aroC_aroN_5B	da_amdN_6B	aroCminus_sumpc	ALogP	CrippenLogP	XLogP	C1SP3	number of amdN
1	6.678	210	Cc1[nH]nc(c1-c1ccc2OCCOc2c1)-c1cc(Cl)c(O)cc1O	0	17	15	9	16	0.9208	15	0	0	14	0	-0.1119	0.2184	4.5883	2.853	3	0
2	5.357	4400	COc1ccc(cc1)-c1c(C)[nH]nc1-c1ccc(O)cc1O	0	15	15	8	15	0.6117	13	0	0	14	0	-0.2185	0.5297	4.1723	2.246	1	0
3	6.824	150	COc1ccc(cc1)-c1c(C)[nH]nc1-c1cc(Cl)c(O)cc1O	0	15	15	7	15	0.716	15	0	0	14	0	-0.1808	0.8984	4.8257	2.823	1	0
4	6.292	510	COc1ccc(cc1)-c1c([nH]nc1-c1cc(Cl)c(O)cc1O)C(O)=O	0	15	15	9	15	0.8374	15	0	0	14	0	-0.18	0.2191	4.03598	2.215	0	0
5	7.155	70	CCNC(=O)c1[nH]nc(c1-c1ccc(OC)cc1)-c1cc(Br)c(O)cc1O	0	15	15	7	15	0.7852	13	1	1	14	0	-0.1845	0.2608	3.64108	2.604	2	1
6	6.921	120	COc1ccc(cc1)-c1c(n[nH]c1C(=O)NC(C)C)-c1cc(Cl)c(O)cc1O	0	15	15	8	15	0.8132	13	1	2	14	0	-0.1801	-0.1237	4.01608	2.888	2	1
7	4.932	11700	COc1cccc(NC(=O)c2c[nH]nc2-c2cc(Cl)c(O)cc2O)c1	0	15	15	5	13	0.8061	8	0	0	10	1	-0.1437	-0.5013	3.03417	2.454	0	1
8	5.222	6000	COc1ccc(NC(=O)c2c[nH]nc2-c2cc(Cl)c(O)cc2O)cc1	0	15	15	5	13	0.7999	8	0	0	10	1	-0.1375	-0.5013	3.03417	2.454	0	1
9	5.056	8800	Oc1ccc(NS(=O)(=O)c2ccc(F)cc2)cc1-c1c(O)ccc2ccccc12	0	22	22	6	14	0.5952	11	0	0	0	0	-0.5184	1.3169	5.79078	2.46	0	0
10	5.658	2200	Oc1ccc(NS(=O)(=O)c2ccc(Cl)cc2)cc1-c1c(O)ccc2ccccc12	0	22	22	6	14	0.5127	11	0	0	0	0	-0.5548	1.7758	6.30508	2.921	0	0
11	5.215	6100	Oc1ccc(NS(=O)(=O)c2ccc(Br)cc2)cc1-c1c(O)ccc2ccccc12	0	22	22	6	16	0.4896	10	0	0	0	0	-0.5642	1.8598	6.41418	3.097	0	0
12	5.18	6600	CCc1ccc(cc1)S(=O)(=O)Nc1ccc(O)c(c1)-c1c(O)ccc2ccccc12	0	22	22	9	18	0.4715	12	0	0	0	0	-0.6349	1.5184	6.21408	3.411	1	0
13	4.578	26400	CC(C)(C)c1ccc(cc1)S(=O)(=O)Nc1ccc(O)c(c1)-c1c(O)ccc2ccccc12	0	22	22	9	19	0.4715	16	0	0	0	0	-0.6283	2.7677	6.94918	4.327	3	0
14	4.818	15200	Cc1cc(C)c(cc1C)S(=O)(=O)Nc1ccc(O)c(c1)-c1c(O)ccc2ccccc12	0	22	22	6	14	0.4746	10	0	0	0	0	-0.6064	2.7463	6.39054	3.52	3	0
15	4.818	15200	Oc1ccc(-c2noc3cc(O)ccc23)c(O)c1	0	13	13	7	13	0.8089	11	0	0	13	0	-0.1295	0.0198	2.95668	1.464	0	0
16	6.097	800	CN1CCN(CC1)c1ccc2onc(-c3cc(Cl)c(O)cc3O)c2c1	0	17	13	7	15	0.796	12	0	0	13	0	-0.1061	0.6799	4.29188	2.419	4	0
17	6.588	258	CC(=O)c1ccc(CNC(=O)c2c[nH]nc2-c2cc(Cl)c(O)cc2O)cc1	0	15	15	4	10	0.6626	7	1	1	9	1	-0.2722	-0.1894	2.44619	1.783	2	1
18	6.836	146	CCNC(=O)c1[nH]nc(c1-c1ccc(CN(CC)CC)cc1)-c1cc(Cl)c(O)cc1O	0	15	15	8	15	0.693	13	2	1	14	0	-0.2948	1.21	4.02568	3.162	7	1
19	6.939	115	CCNC(=O)c1[nH]nc(c1-c1ccc(CNC(=O)C2CCCN(C)C2)cc1)-c1cc(Cl)c(O)cc1O	0	20	15	7	15	0.693	11	2	2	14	0	-0.2912	-0.1818	3.14188	2.022	5	2
20	7.456	35	CCNC(=O)c1[nH]nc(c1-c1ccc(CNCCS(C)(=O)=O)cc1)-c1cc(Cl)c(O)cc1O	0	15	15	9	15	0.693	12	2	1	14	0	-0.295	-0.2287	3.39888	1.892	5	1
21	7.569	27	CCNC(=O)c1[nH]nc(c1-c1ccc(CN2CCS(=O)(=O)CC2)cc1)-c1cc(Cl)c(O)cc1O	0	19	15	8	16	0.693	11	2	1	14	0	-0.2948	0.1258	3.49508	1.856	7	1
22	7.432	37	CCNC(=O)c1[nH]nc(c1-c1ccc(CN2CCOCC2)cc1)-c1cc(Cl)c(O)cc1O	0	19	15	9	15	0.693	13	2	1	14	0	-0.2948	0.3969	3.01608	1.916	7	1
23	7.244	57	CCNC(=O)c1[nH]nc(c1-c1ccc(CNC(=O)CC2CCCN2)cc1)-c1cc(Cl)c(O)cc1O	0	19	15	7	17	0.693	13	2	2	14	0	-0.2912	-1.1438	2.94218	2.379	4	2
24	6.848	142	CCNC(=O)c1[nH]nc(c1-c1ccc(CN(CCO)CCO)cc1)-c1cc(Cl)c(O)cc1O	0	15	15	10	15	0.693	13	2	1	14	0	-0.2948	-0.3696	1.97048	0.898	7	1
25	6.654	222	CCNC(=O)c1[nH]nc(c1-c1cccc(CN2CCOCC2)c1)-c1cc(Cl)c(O)cc1O	0	19	15	10	16	0.693	13	2	1	14	0	-0.2948	0.3969	3.01608	1.916	7	1
26	6	1000	CCNC(=O)c1[nH]nc(c1-c1cccc(CNCCN2CCCCC2)c1)-c1cc(Cl)c(O)cc1O	0	20	15	7	14	0.693	11	2	1	14	0	-0.295	-2.092	3.75938	3.384	7	1
27	6.636	231	CCNC(=O)c1[nH]nc(c1-c1cccc(CNCc2ccccc2C(F)(F)F)c1)-c1cc(Cl)c(O)cc1O	0	21	21	7	14	0.7522	11	2	1	14	0	-0.5462	2.1929	4.81188	3.838	5	1
28	6.138	728	CCNC(=O)c1[nH]nc(c1-c1cccc(CNCCOC)c1)-c1cc(Cl)c(O)cc1O	0	15	15	8	15	0.693	13	2	1	14	0	-0.295	0.0424	2.91988	1.887	5	1
29	5.889	1290	CCNC(=O)c1[nH]nc(c1-c1cccc(CN2CCN(CC2)C(C)=O)c1)-c1cc(Cl)c(O)cc1O	0	19	15	8	16	0.693	13	2	1	14	0	-0.2948	-0.0739	2.84798	1.748	8	2
30	6.366	431	CCNC(=O)c1[nH]nc(c1-c1cccc(CNCCN2CCOCC2)c1)-c1cc(Cl)c(O)cc1O	0	19	15	7	14	0.693	11	2	1	14	0	-0.295	-1.3589	2.60568	2.12	9	1
31	5.78	1660	CCNC(=O)c1[nH]nc(c1-c1cccc(CN2CCC[C@H]2CO)c1)-c1cc(Cl)c(O)cc1O	0	19	15	9	15	0.693	12	2	1	14	0	-0.2948	-0.5589	3.14058	2.15	5	1
32	7.409	39	CCNC(=O)c1noc(c1-c1ccc(CN2CCN(C)CC2)cc1)-c1cc(Cl)c(O)cc1O	0	19	15	10	16	0.8564	13	2	1	13	0	-0.2913	0.9328	3.19898	1.911	7	1
33	7.678	21	CCNC(=O)c1noc(c1-c1ccc(CN2CCOCC2)cc1)-c1cc(Cl)c(O)cc1O	0	19	15	10	15	0.8564	13	2	1	13	0	-0.2913	0.6632	3.28378	1.868	7	1
34	7.194	64	CCNC(=O)c1noc(c1-c1ccc(CN(CC)CC)cc1)-c1cc(Cl)c(O)cc1O	0	15	15	8	15	0.8564	13	2	1	13	0	-0.2913	1.4763	4.29338	3.114	7	1
35	7.721	19	CCNC(=O)c1noc(c1-c1ccc(CN2CCCCC2)cc1)-c1cc(Cl)c(O)cc1O	0	20	15	10	15	0.8564	13	2	1	13	0	-0.2913	-0.0699	4.43748	3.132	5	1
36	7.553	28	CCNC(=O)c1noc(c1-c1ccc(CN2CCC(O)CC2)cc1)-c1cc(Cl)c(O)cc1O	0	20	15	10	16	0.8564	13	2	1	13	0	-0.2913	-0.2926	3.40828	2.102	5	1
37	7.409	39	CCNC(=O)c1noc(c1-c1ccc(CN2CCCC2)cc1)-c1cc(Cl)c(O)cc1O	0	19	15	8	16	0.8564	13	2	1	13	0	-0.2913	0.2181	4.04738	2.774	5	1
38	7.745	18	CCNC(=O)c1noc(c1-c1ccc(CN(C)C)cc1)-c1cc(Cl)c(O)cc1O	0	15	15	8	15	0.8564	13	2	1	13	0	-0.2913	0.9755	3.51318	2.268	3	1
39	6.896	127	CCNC(=O)c1noc(c1-c1cccc(CN2CCOCC2)c1)-c1cc(Cl)c(O)cc1O	0	19	15	10	16	0.8564	13	2	1	13	0	-0.2913	0.6632	3.28378	1.868	7	1
40	6.465	343	CCNC(=O)c1noc(c1-c1cccc(CN2CCN(C)CC2)c1)-c1cc(Cl)c(O)cc1O	0	19	15	9	16	0.8564	12	2	1	13	0	-0.2913	0.9328	3.19898	1.911	7	1
41	6.622	239	CCNC(=O)c1noc(c1-c1cccc(CN2CCN(CC2)C(C)=O)c1)-c1cc(Cl)c(O)cc1O	0	19	15	9	15	0.8564	13	2	1	13	0	-0.2913	0.1924	3.11568	1.7	8	2
42	7.495	32	CCNC(=O)c1noc(c1-c1ccc(CN2CCOCC2)cc1)-c1cc(CCc2ccccc2)c(O)cc1O	0	25	21	8	17	0.7556	14	2	1	13	0	-0.6602	-1.3149	4.41558	6.519	7	1
43	7.538	29	CCNC(=O)c1noc(c1-c1ccc(CN2CCOCC2)cc1)-c1cc(CC)c(O)cc1O	0	19	15	10	16	0.7556	13	2	1	13	0	-0.3119	0.4058	3.19278	1.936	8	1
44	7.699	20	CCNC(=O)c1noc(c1-c1ccc(CN2CCOCC2)cc1)-c1cc(CCc2ccc(F)cc2)c(O)cc1O	0	25	21	9	16	0.879	14	2	1	13	0	-0.5224	-0.8352	4.55468	5.423	7	1
45	7.585	26	CCNC(=O)c1noc(c1-c1ccc(CN2CCCCC2)cc1)-c1cc(CCc2ccc(F)cc2)c(O)cc1O	0	26	21	8	17	0.879	14	2	1	13	0	-0.5224	0.6082	5.70838	3.721	5	1
46	7.585	26	CCNC(=O)c1noc(c1-c1ccc(CN2CCOCC2)cc1)-c1cc(CCc2cccc(F)c2)c(O)cc1O	0	25	21	8	17	0.8793	14	2	1	13	0	-0.5225	-0.8352	4.55468	5.423	7	1
47	7.658	22	CCNC(=O)c1noc(c1-c1ccc(CN2CCOCC2)cc1)-c1cc(c(O)cc1O)-c1ccccc1	0	25	21	9	15	0.7853	15	2	1	13	0	-0.6083	-1.4397	4.34578	5.381	7	1
48	7.854	14	CCNC(=O)c1noc(c1-c1ccc(CN2CCCCC2)cc1)-c1cc(c(O)cc1O)-c1ccccc1	0	26	21	9	15	0.7853	15	2	1	13	0	-0.6083	0.5736	5.49948	4.18	5	1
49	7.409	39	CCNC(=O)c1noc(c1-c1ccc(CN2CCOCC2)cc1)-c1cc(c(O)cc1O)-c1ccccc1F	0	25	21	8	15	0.9401	15	2	1	13	0	-0.499	1.2165	4.48488	2.188	7	1
50	7.854	14	CCNC(=O)c1noc(c1-c1ccc(CN2CCCCC2)cc1)-c1cc(c(O)cc1O)-c1ccccc1C	0	26	21	8	15	0.7855	15	2	1	13	0	-0.5908	-1.5308	5.5275	6.968	6	1
51	7.444	36	CCNC(=O)c1noc(c1-c1ccc(CN2CCCCC2)cc1)-c1cc(c(O)cc1O)-c1ccc(F)cc1	0	26	21	8	16	0.9087	15	2	1	13	0	-0.4704	-1.6931	5.63858	5.549	5	1
52	7.456	35	CCNC(=O)c1noc(c1-c1ccc(CN2CCOCC2)cc1)-c1cc(CC(C)C)c(O)cc1O	0	19	15	8	16	0.7556	13	2	1	13	0	-0.3114	-0.5456	3.82888	4.12	9	1
53	7.131	74	CCNCc1ccc(cc1)-c1c(noc1-c1cc(c(O)cc1O)-c1ccccc1)C(=O)NCC	0	21	21	8	18	0.7853	17	2	1	13	0	-0.6085	1.3335	4.62308	3.5	5	1
54	6.268	540	CCNC(=O)c1noc(c1-c1ccc(CN2CCOCC2)cc1)-c1cc(CC)c(O)cc1OC	0	19	15	9	15	0.7593	13	2	1	13	0	-0.3119	-0.7243	3.49578	3.562	8	1
55	5.807	1560	CCNC(=O)c1noc(c1-c1ccc(CN2CCOCC2)cc1)-c1cc(CC)c(OC)cc1OC	0	19	15	8	15	0.7627	13	2	1	13	0	-0.3117	-0.3158	3.79878	4.081	8	1
56	5.078	8363.1	COc1ccc2c(C)n[nH]c3cccc1c23	0	11	11	10	11	0.3128	11	0	0	11	0	-0.2132	0.924	2.81828	1.68	1	0
57	4.301	50000	CC(=O)c1cccc(NC(=O)CSc2nnc(o2)-c2ccc(cc2)S(=O)(=O)N2CCCC2)c1	0	18	14	2	6	0.7243	4	1	0	8	0	-0.3453	0.153	2.91257	1.292	4	1
58	5.282	5224.6	OC(=O)c1ccc2C(=O)c3ccccc3-c3ncnc1c23	0	15	0	10	15	0	12	0	1	0	0	0	-2.0396	0.99	1.057	0	0
59	4.301	50000	CC(OC(=O)c1cccs1)C(=O)NCc1cccs1	0	8	8	1	5	0.1031	3	1	0	0	0	-0.2464	0.2967	1.8441	1.49	2	1
60	4.885	13044	OC(=O)c1ccccc1C1=Nc2ccc(O)cc2Oc2cc(O)ccc12	0	19	18	7	18	0.8197	14	0	0	0	0	-0.3329	0.6573	4.46928	1.679	0	0
61	4.301	50000	O=C1C(Nc2ccccc12)=C1C(=O)c2ccccc2C1=O	0	17	12	7	12	0.1535	8	0	0	0	0	-0.4323	0.3868	3.12277	1.535	0	0
62	5.244	5695.5	CC(=O)Nc1cc(OC(C)=O)c2nonc2c1OC(C)=O	0	6	6	6	6	0.7998	6	0	2	6	0	0	-1.5574	1.15198	1.101	3	1
63	4.805	15656.8	COc1cccc(c1)C(=O)NC1CC2CCCC(C1)N2CC(=O)Nc1ccccc1	0	20	12	4	20	0.1944	12	1	0	0	0	-0.3974	-1.3836	3.51467	1.781	1	2
64	5.351	4455	Cn1c2cccc3C(=O)c4ccccc4-c(c(NCCO)c1=O)c23	0	16	16	9	15	0.7214	13	0	1	13	0	-0.3771	-0.2508	0.69273	0.684	2	0
65	4.301	50000	Cc1cc(SCC(N)=O)nc(SCC(=O)c2ccccc2)n1	0	10	10	4	10	0.3536	7	0	0	5	0	-0.2949	1.2684	2.92211	0.245	3	1
66	4.832	14723.4	Oc1ccc(NCN2C(=O)C3C4CC(C=C4)C3C2=O)cc1	0	15	6	3	9	0.1455	6	0	0	0	0	-0.1116	-2.1611	1.93968	0.433	0	1
67	5.301	5000	CCn1nc(nc2c1nc(=O)n(C)c2=O)-c1cccs1	0	9	9	4	5	1.2427	5	0	0	9	0	-0.1215	-1.9173	1.64426	1.427	2	0
68	4.564	27302	CN(C)c1ccc(cc1)N=Cc1nc(oc1O)-c1ccccc1	0	15	15	3	10	0.8414	7	0	0	12	0	-0.4293	1.8823	4.74217	2.567	0	0
69	4.301	50000	Nc1nonc1N1CCCCC1	0	7	2	4	5	0.4087	5	0	0	2	0	0	-1.9481	1.75039	2.03	2	0
70	5.112	7723.9	Oc1ccc(cc1O)C(=O)CSc1nnc([nH]1)-c1ccccc1	0	14	14	3	8	0.7102	5	0	0	9	0	-0.3556	1.4909	2.63327	3.174	1	0
71	4.82	15120.1	CCOC(=O)c1cnc(SC2CCc3ccccc3C2=O)nc1N	0	14	10	5	11	0.5112	9	0	2	5	0	-0.2683	0.6222	3.33568	1.01	2	0
72	4.301	50000	CCOC(=O)c1sc(NC(=O)CSc2nnc(-c3ccc(OC)cc3)n2CCOC)nc1C	0	11	11	2	7	0.8439	3	0	1	11	0	-0.1338	1.9301	3.36328	2.399	6	1
73	4.718	19122.5	Oc1ccc(\C=C(/C#N)C(=O)NCCCc2ccccc2)cc1O	0	12	12	0	4	0.317	2	0	0	0	0	-0.4454	0.7475	2.94166	2.56	1	1
74	5.035	9234	CC(=O)Oc1cccc2C(=O)c3cc(cc(OC(C)=O)c3C(=O)c12)C(O)=O	0	14	12	7	13	0.575	11	0	0	0	0	-0.1666	0.0054	3.01238	0.121	2	0
75	5.581	2623.2	CC(Cc1ccc(O)c(O)c1)C(C)Cc1ccc(O)c(O)c1	0	12	12	4	12	0.6334	9	0	0	0	0	-0.2558	1.0724	3.5664	4.554	2	0
76	4.301	50000	OC(=O)\C=C\c1ccc(O)c(O)c1	0	6	6	6	6	0.317	6	0	0	0	0	-0.0974	0.2029	1.01289	0.888	0	0
77	5.476	3339.3	OC(=O)c1cc(O)c2C(=O)c3c(O)cccc3C(=O)c2c1	0	14	12	9	13	0.5435	11	0	0	0	0	-0.1685	-0.0648	1.94199	-0.261	0	0
78	4.676	21068.2	OCCN(CCO)c1nc(N2CCCCC2)c2nc(nc(N3CCCCC3)c2n1)N(CCO)CCO	0	16	6	4	8	1.0184	7	0	0	6	0	0	-6.0178	1.72506	0.082	12	0
79	5.193	6407.9	O=C1C=Cc2ccccc2\C1=C\NC12CN3CN(C1)CCN(C3)C2	0	18	6	6	15	0	8	0	0	0	0	-0.2525	0.264	0.68207	0.893	5	0
80	4.301	50000	CN(C)\C=N\c1c(Br)cc(Br)c2nonc12	0	6	6	6	6	0.5183	6	0	0	6	0	-0.0294	0.688	2.86689	3.068	0	0
81	4.301	50000	CCOC(=O)C1C(C(C(=O)OCC)=C(C)OC1=N)c1cccnc1	0	10	5	7	9	0.0589	7	0	0	5	0	-0.1187	0.0971	2.04401	0.812	5	0
82	4.676	21106.2	COc1ccc(OC)c(C=Nc2oc(-c3ccco3)c(-c3ccco3)c2C#N)c1	0	18	18	5	15	1.4206	9	1	0	0	0	-0.1153	-0.2087	6.36124	2.279	0	0
83	4.326	47232.8	CC(=O)Nc1cnc2ccccc2n1	0	8	8	5	8	0.3929	8	0	0	8	0	-0.1876	0.1761	1.79496	1.102	1	1
84	5.806	1562.5	O=C1c2ccccc2-c2onc3ccc(NCc4ccco4)c1c23	0	18	17	8	13	0.7262	11	0	0	12	0	-0.3339	-0.0945	4.90767	1.875	1	0
85	5.132	7382.3	CC1=NC(c2ccccc2)C(C#N)(C#N)C(C1)(C#N)C#N	0	11	6	7	10	0	9	1	0	0	0	-0.3181	0.3836	2.31832	-0.608	1	0
86	4.46	34704.1	Nc1cc(N)c(OCC(F)(F)F)cc1OCC(F)(F)F	0	6	6	6	6	0.4531	6	0	0	0	0	-0.0132	0.0276	3.84149	3.162	4	0
87	5.179	6620.8	Cc1coc2c(O)cc3C4CCCNC(=O)C4(Oc3c12)N1CCCCC1	0	19	8	7	17	0.6508	12	0	0	0	0	-0.0107	-2.1288	3.21621	1.435	4	1
88	5.237	5794.7	Oc1cc2C3CCCNC(=O)C3(Oc2c2ccccc12)N1CCCCC1	0	21	10	8	19	0.3222	16	0	0	0	0	-0.2355	-1.1811	3.98498	1.688	3	1
89	4.301	50000	CCCCCC(=O)N1CC2(C)CN(CC(C)(C1)C2=O)C(=O)CCCCC	0	7	0	7	7	0	7	0	2	0	0	0	-2.4984	3.4131	2.771	8	2
90	4.301	50000	Cc1ccc(cc1)S(=O)(=O)C(CCC(=O)N1CCOCC1)S(=O)(=O)c1ccc(C)cc1	0	16	12	5	16	0.1806	14	0	0	0	0	-0.475	1.0921	3.55003	0.396	7	1
91	5.471	3380.9	Nc1ccc2ncccc2c1N	0	9	9	8	9	0.2249	9	0	0	9	0	-0.1633	-1.4404	2.80028	0.12	0	0
92	4.924	11910.1	C[C@H](NC(=O)C1CCN(CC1)S(=O)(=O)c1ccc(C)cc1)C(=O)Nc1ccc2OCOc2c1	0	18	12	5	13	0.482	7	1	0	0	0	-0.2857	-2.6701	2.62149	2.818	4	2
93	6.553	280.1	O=C1c2ccccc2-c2onc3ccc(NCCCn4ccnc4)c1c23	0	17	16	6	11	0.6773	11	0	0	15	0	-0.2911	-1.8594	4.75997	1.882	2	0
94	4.301	50000	Clc1c(sc2ccccc12)C(=O)N(Cc1ccco1)C1CCS(=O)(=O)C1	0	16	12	4	12	0.4054	8	1	0	0	0	-0.264	0.1914	3.49397	1.766	3	1
95	4.301	50000	COc1ccc(NCc2cc3cc(OC)ccc3[nH]c2=O)cc1	0	15	15	3	11	0.6086	7	0	0	10	0	-0.217	0.0492	3.74378	1.23	1	0
96	4.301	50000	CC(C)CN1C(=O)NC(NC(=O)c2ccco2)(C1=O)C(F)(F)F	0	7	4	0	4	0.2819	2	1	0	0	0	-0.0344	-0.4119	1.32449	2.34	4	3
97	4.301	50000	Cc1ccc(NC(=O)CC2SCCNC2=O)cc1Cl	0	10	6	6	9	0.0804	9	0	0	0	0	-0.1497	0.9936	1.54761	0.586	3	2
98	4.301	50000	COc1ccc(cc1Cl)S(=O)(=O)N(C)CC(=O)N1CCC(CC1)C(N)=O	0	11	6	2	10	0.3299	5	1	0	0	0	-0.0618	-2.1764	1.14579	-0.822	3	2
99	4.301	50000	Oc1ccc(cc1)N1CCN(CC1)C(=O)c1ccc2ccccc2c1	0	20	16	6	13	0.1845	8	1	0	0	0	-0.5208	1.5705	3.82368	3.025	4	1
100	5.618	2410.8	Nc1nc(cc2c(C#N)c(nc(N)c12)N1CCCC1)N1CCCC1	0	16	8	8	12	0.6991	8	1	0	8	0	-0.0124	-1.4323	0.79771	1.575	4	0
101	4.301	50000	CCOC(=O)NC1(Nc2ccc(Cl)cn2)Oc2ccccc2O1	0	12	11	2	9	0.5735	7	0	0	7	0	-0.2072	1.6225	2.92094	2.789	2	1
102	5.609	2462	Cc1c(oc2ccc(F)cc2c1=O)-c1nn(C)c(=O)c2ccccc12	0	17	17	7	15	1.2083	10	0	0	14	0	-0.2734	1.2253	2.75438	1.782	1	0
103	4.746	17963.7	Oc1ccc(-c2onc(c2-c2cscn2)C(F)(F)F)c(O)c1	0	12	12	7	12	0.9437	10	0	0	11	0	-0.0633	0.8018	4.48129	2.889	1	0
104	4.34	45748.6	Cc1ccc(c(C)c1)S(=O)(=O)Nc1ccc2oc(=O)sc2c1	0	13	13	9	12	0.7486	11	0	0	0	0	-0.2933	0.985	2.78803	1.379	2	0
105	4.476	33419.5	CCOC(=O)NC1(NCc2ccccc2)Oc2ccccc2O1	0	13	12	4	12	0.3402	6	1	0	0	0	-0.4808	2.9115	2.76629	2.757	3	1
106	4.886	13003.8	CCOc1cc(N2CCOCC2)c(OCC)cc1N=C1CCCCCN1	0	16	6	5	9	0.6609	6	0	2	0	0	0	-1.3753	3.91268	3.023	9	0
107	5.953	1114.3	CCn1c(CSc2nnc3ccccn23)nc2cc(ccc12)C(O)=O	0	13	13	4	10	0.7128	7	0	0	13	0	-0.2202	0.7237	3.39856	2.972	3	0
108	4.874	13377.1	CCn1c(CSc2nccn2C)nc2cc(ccc12)C(O)=O	0	10	10	4	10	0.5815	9	0	0	10	0	-0.1013	-0.6459	3.08936	1.472	3	0
109	4.301	50000	FC(F)(F)C1(NC(=O)NCCN2CCOCC2)Oc2ccc(Cl)cc2O1	0	11	6	0	4	0.3863	2	0	0	0	0	-0.0544	1.1164	2.28869	1.785	8	2
110	5.706	1967.6	CCc1cc(-c2n[nH]cc2-c2ccc3OCOc3c2)c(O)cc1O	0	16	15	7	15	0.8147	14	0	1	14	0	-0.1326	-0.5704	3.56169	2.822	1	0
111	4.876	13307	CCOC(=O)c1c(C)oc2c1c(C=NCC1CCCO1)c(O)c1ccccc21	0	16	12	9	15	0.6532	13	1	0	0	0	-0.2229	-0.0966	4.3909	2.429	5	0
112	4.709	19528.1	OC1(NC(=O)c2ccccc2)C(=O)c2ccccc2C1=O	0	15	12	3	11	0.1032	6	1	0	0	1	-0.5059	0.6173	1.12949	2.053	0	1
113	5.332	4652.2	CC(=O)Oc1cc2c(C(=O)NCCCN3CCOCC3)c(C)oc2c2ccccc12	0	16	12	4	12	0.5777	9	1	0	0	0	-0.2299	-0.7899	3.4183	3.001	8	1
114	4.706	19699.4	CC(=O)Oc1cc2c(C(=O)NCCN3CCOCC3)c(C)oc2c2ccccc12	0	16	12	5	13	0.5777	8	1	0	0	0	-0.2299	0.1821	3.0282	0.944	8	1
115	4.301	50000	CCCc1cc2OCOc2cc1NS(=O)(=O)c1ccc(CCNC(C)=O)cc1	0	13	12	6	12	0.5045	12	0	0	0	0	-0.2613	-1.1428	3.86188	1.715	3	1
116	4.443	36081.7	COc1ccc(cc1OC)S(=O)(=O)Nc1ccc2OCOc2c1	0	13	12	6	12	0.8396	11	0	0	0	0	-0.0958	-1.2168	3.74877	1.47	0	0
117	4.868	13544.9	O=C(NCCCn1ccnc1)c1noc-2c1CCc1ccccc-21	0	14	12	4	8	0.5634	5	1	0	11	0	-0.2675	-1.8717	2.34497	1.802	2	1
118	4.95	11212	Nc1nc-2c(CCc3c-2cnn3-c2ccccc2)s1	0	14	12	8	12	0.484	9	0	0	12	0	-0.2538	1.4788	4.66787	0.967	0	0
119	4.632	23359.5	FC(F)(F)C1(NC(=O)N2CCC3(CC2)OCCO3)Oc2ccc(Cl)cc2O1	0	14	6	1	9	0.3863	4	0	2	0	0	-0.0544	0.1457	2.81489	2.392	6	2
120	4.491	32315.5	CCOc1ccc(cc1)S(=O)(=O)Nc1cc(Sc2nnc[nH]2)c2oc(=O)sc2c1	0	15	15	7	13	1.2548	9	0	0	7	0	-0.1431	-0.0046	2.19717	2.445	2	0
121	4.301	50000	CC(C)OC(=O)CSc1nc2ccccc2s1	0	7	7	3	7	0.2557	5	0	0	7	0	-0.2014	2.0034	3.17828	1.701	3	0
122	5.105	7855.4	CCOc1ccc(NCC(=O)Nc2ccc(C)cc2C)cc1	0	12	12	12	12	0.1847	12	0	0	0	0	-0.3416	1.3008	3.36683	2.091	5	1
123	4.301	50000	Clc1ccc(CS(=O)(=O)Nc2ccc3OCOc3c2)cc1	0	13	12	10	12	0.4329	12	0	0	0	0	-0.2721	0.4119	3.07757	1.559	1	0
124	4.301	50000	COC(=O)C1=C(C)N(C(=O)C1)c1cccc2ccccc12	0	14	10	6	12	0.0526	9	0	1	0	0	-0.3972	1.1771	2.56908	1.523	1	1
125	4.963	10892.1	COC(=O)c1ccc2N=C3CCCC(=O)C3Sc2c1	0	12	6	8	12	0.1725	9	0	0	0	0	-0.1125	0.1711	2.10378	-0.055	0	0
126	4.618	24075.5	CCOC(O)c1oc2C(=O)C(=O)C=Cc2c(=O)c1-c1nncn1-c1ccccc1	0	17	13	5	11	1.0973	7	0	0	13	0	-0.2568	-0.2503	0.94566	1.522	3	0
127	4.42	38014.5	CCc1ccc(CNc2ccc(cc2)N2CCN(CC2)C(C)=O)cc1	0	16	12	6	11	0.0574	8	0	0	0	0	-0.4642	0.8548	3.79019	2.821	7	1
128	4.301	50000	OC(=O)COc1c(Cl)cccc1Cl	0	6	6	5	6	0.3257	6	0	0	0	0	-0.1382	1.0983	2.95759	1.592	1	0
129	4.301	50000	Cc1ccc(cc1S(=O)(=O)NCC1CCCO1)C(O)=O	0	10	6	5	10	0.1696	8	1	0	0	0	-0.1488	-0.7262	1.43872	-0.313	3	0
130	4.301	50000	Oc1ccccc1C(=O)OC1CCc2ccccc2C1=O	0	16	12	4	10	0.2554	9	0	0	0	0	-0.4507	0.9193	3.11729	2.751	0	0
131	4.387	40993.3	Cc1ccc(CNc2ccc(O)cc2)cc1	0	12	12	5	12	0.1446	9	0	0	0	0	-0.423	1.6389	3.29291	2.19	2	0
132	4.301	50000	CC(NC(=O)c1ccoc1C)C(C)(C)C	0	4	4	3	4	0.2839	4	1	0	0	0	-0.0115	0.9799	2.47202	2.201	5	1
133	4.301	50000	COc1ccc(N2CSC3=C(C#N)C(CC(=O)N3C2)c2ccc(OC)c(OC)c2)c(OC)c1	0	19	12	5	11	0.6891	7	0	0	0	0	-0.1695	-0.0071	4.36746	2.226	0	1
134	4.715	19271.2	COc1ccc(cc1)-c1nc(CS(=O)CC(=O)NCc2ccccn2)c(C)o1	0	14	14	2	4	0.6926	3	1	0	14	0	-0.2714	-1.2457	3.75056	-1.028	4	1
135	4.301	50000	CC(=O)c1ccc(NC(=O)CSc2nnc(Cc3cccn3C)n2-c2ccc(F)cc2)cc1	0	18	18	4	13	0.5957	6	0	0	12	0	-0.3821	1.3221	4.42846	3.169	2	1
136	4.301	50000	CN(C)CCNc1nc2n(C)c(=O)n(C)c(=O)c2n1CC(O)COc1ccccc1C	0	11	11	3	9	1.2597	6	0	0	6	0	-0.2035	-0.974	2.30639	0.107	5	0
137	4.648	22506.3	Cc1noc(C(=O)Nc2ccc3OCOc3c2)c1Cl	0	10	9	6	8	0.8316	8	0	0	4	0	-0.0512	-0.7346	2.86239	2.012	1	1
138	4.301	50000	CCOC(=O)N1CCC(CC1)NC(=O)CSCc1nc(oc1C)-c1sccc1C	0	12	7	1	6	0.5305	4	0	0	7	0	-0.1055	0.5167	3.57904	2.028	8	2
139	4.301	50000	CCSCCOC(=O)C1C(NC(=O)N=C1C)c1ccccc1	0	10	6	4	7	0	6	1	1	0	0	-0.3241	1.0298	2.38089	1.941	5	2
140	4.301	50000	Cn1cnnc1SCC(=O)c1ccc2CCCCc2c1	0	12	8	6	10	0.3303	7	0	0	3	0	-0.2441	0.6003	3.07409	3.918	1	0
141	4.686	20627.5	Cc1c(N=c2c(=O)c3ccccc3c2=O)c(=O)n(-c2ccccc2)n1C	0	18	18	3	9	1.2397	5	0	0	12	0	-0.476	0.6045	0.50828	0.368	1	0
142	4.301	50000	CC(=O)CCc1c(C)nc2ccccc2c1O	0	9	9	6	9	0.3094	8	0	0	9	0	-0.2054	0.0828	3.54279	1.231	2	0
143	6.131	740.4	Oc1ccc(cc1)-c1nc(cs1)-c1ccc(O)c(O)c1	0	15	15	6	13	0.6375	9	0	0	15	0	-0.2083	0.8516	4.46648	2.041	0	0
144	4.301	50000	CC(=O)Oc1cc2oc(=O)cc(C)c2cc1OC(C)=O	0	9	9	6	8	0.9104	8	0	0	0	0	-0.0375	0.4892	2.53529	1.944	3	0
145	4.686	20606.1	Oc1ccc(cc1)N=Cc1ccc(O)c(O)c1	0	12	12	7	12	0.4981	12	0	0	0	0	-0.1788	0.4409	2.82228	1.393	0	0
146	4.565	27213.2	CC(C)c1cc(Nc2cccc(O)c2)cc(C(C)C)c1O	0	12	12	8	11	0.3103	9	0	0	0	0	-0.187	1.1212	5.68829	3.608	4	0
147	4.301	50000	CS(=O)(=O)N(CC(=O)NCC=C)c1cccc(Br)c1	0	6	6	6	6	0.0722	6	0	0	0	0	-0.1706	0.4576	3.05138	1.484	2	1
148	4.301	50000	O=c1oc2c3CCCN4CCCc(cc2s1)c34	0	13	7	7	12	0.6486	12	0	0	0	0	-0.064	-0.7339	3.25618	1.8	2	0
149	4.301	50000	[O-][N+](=O)c1ccc(=O)c2ccc[nH]c12	0	9	9	7	8	0.6889	8	0	0	9	0	-0.1002	0.8024	0.68834	1.558	0	0
150	4.952	11173.2	Oc1cc(NS(=O)(=O)c2ccc(F)cc2)c2ncccc2c1	0	15	15	6	15	0.5607	14	0	0	10	0	-0.2189	-0.127	4.05757	0.906	0	0
151	4.301	50000	CC(=O)CCCNc1c(OCc2ccccc2)ccc2c(C)cc(=O)oc12	0	15	15	6	11	0.8085	9	0	0	0	0	-0.4032	0.801	4.62188	3.19	4	0
152	4.301	50000	Nc1ccc(NS(=O)(=O)c2cc(Cl)ccc2Cl)cc1-c1ccccc1O	0	18	18	7	14	0.4779	9	0	0	0	0	-0.3927	0.9665	6.41958	1.945	0	0
153	4.301	50000	COc1ccc2OCOc2c1-c1cc(NS(=O)(=O)c2cc(Cl)ccc2Cl)ccc1N	0	19	18	7	14	0.8788	10	0	0	0	0	-0.2315	-0.1653	6.34457	2.462	0	0
154	4.301	50000	Nc1ccc(NS(=O)(=O)c2ccccc2[N+]([O-])=O)cc1-c1ccccc1O	0	18	18	6	11	0.7414	8	0	0	0	0	-0.4385	0.4424	4.87998	1.008	0	0
155	4.301	50000	Nc1ccc(NS(=O)(=O)c2cccc(c2)[N+]([O-])=O)cc1-c1ccccc1O	0	18	18	6	13	0.6871	9	0	0	0	0	-0.3836	0.4424	4.87998	1.008	0	0
156	4.301	50000	Nc1ccc(NS(=O)(=O)c2ccccc2N)cc1-c1ccccc1O	0	18	18	6	13	0.4198	9	0	0	0	0	-0.4875	-0.9676	4.69498	1.157	0	0
157	4.301	50000	COc1ccc2OCOc2c1-c1cc(NS(=O)(=O)c2cccc(c2)[N+]([O-])=O)ccc1N	0	19	18	7	12	1.088	11	0	0	0	0	-0.2224	-0.6894	4.80497	1.525	0	0
158	4.301	50000	COc1ccc2OCOc2c1-c1cc(NS(=O)(=O)c2ccc(C)cc2)ccc1N	0	19	18	7	12	0.7487	11	0	0	0	0	-0.3681	-0.4563	5.06579	1.911	1	0
159	4.301	50000	COc1ccc(cc1OC)S(=O)(=O)Nc1ccc(O)c(c1)-c1ccccc1O	0	18	18	9	16	0.8015	14	0	0	0	0	-0.3167	-0.1345	5.01647	1.682	0	0
160	4.301	50000	Oc1ccccc1-c1cc(NS(=O)(=O)c2cccc(c2)[N+]([O-])=O)ccc1O	0	18	18	7	12	0.8019	9	0	0	0	0	-0.3591	1.076	4.26568	1.419	0	0
161	4.301	50000	COc1ccc2OCOc2c1-c1cc(NS(=O)(=O)c2cccc(N)c2)ccc1N	0	19	18	7	12	0.7768	9	0	0	0	0	-0.2827	-2.0994	4.61997	0.816	0	0
162	4.301	50000	CCOc1ccc2ccccc2c1-c1cc(NS(=O)(=O)c2cc(Cl)ccc2Cl)ccc1NC(=O)OC(C)(C)C	0	22	22	6	15	0.5031	10	0	0	0	0	-0.525	3.5253	9.04257	5.373	5	1
163	4.301	50000	CCOc1ccc2ccccc2c1-c1cc(NS(=O)(=O)c2cc(Cl)ccc2Cl)ccc1N	0	22	22	6	15	0.4906	10	0	0	0	0	-0.5258	1.8258	7.65838	3.831	2	0
164	4.301	50000	CCOc1ccc2ccccc2c1-c1cc(NS(=O)(=O)c2ccc(C)cc2)ccc1N	0	22	22	7	14	0.3605	10	0	0	0	0	-0.6624	1.5348	6.3796	3.28	3	0
165	4.301	50000	CCOc1ccc2ccccc2c1-c1cc(NS(=O)(=O)c2ccc(OC)c(OC)c2)ccc1N	0	22	22	7	15	0.6994	12	0	0	0	0	-0.4743	0.0912	6.36878	3.157	2	0
166	4.301	50000	COc1ccc(NS(=O)(=O)c2ccccc2)c(OC)c1	0	12	12	6	12	0.4914	11	0	0	0	0	-0.3018	-0.0205	3.51928	1.274	0	0
167	4.301	50000	Nc1ccc(NS(=O)(=O)c2ccccc2)c(O)c1	0	12	12	7	12	0.3693	11	0	0	0	0	-0.3246	-0.7831	3.39738	0.65	0	0
168	4.301	50000	Oc1cc(ccc1NS(=O)(=O)c1ccccc1)[N+]([O-])=O	0	12	12	6	11	0.697	9	0	0	0	0	-0.281	0.6269	2.84468	1.359	0	0
169	4.301	50000	Oc1c(I)cc(Cl)c2cccnc12	0	9	9	6	9	0.4307	7	0	0	9	0	-0.1186	1.0411	3.68165	3.052	0	0
170	4.301	50000	Cc1cc(=O)oc2c(N)c(O)ccc12	0	9	9	8	8	0.8011	8	0	0	0	0	-0.0978	-0.1355	-0.66832	0.963	1	0
171	4.301	50000	Cc1cc(=O)oc2c(N)c(OCc3ccccc3)ccc12	0	15	15	6	12	0.8056	9	0	0	0	0	-0.4032	1.0461	0.86558	1.947	2	0
172	4.903	12500	COc1cc(NCCCC(C)N)c2nccc(Cl)c2c1	0	9	9	6	9	0.3811	9	0	1	9	0	-0.0339	-1.3575	4.14278	2.292	2	0
173	4.301	50000	Nc1cc(Br)cc2cccnc12	0	9	9	7	9	0.1953	8	0	0	9	0	-0.1575	0.209	3.80045	1.365	0	0
174	4.301	50000	Nc1cccc2cc(O)ccc12	0	10	10	10	10	0.1529	10	0	0	0	0	-0.247	0.188	3.23589	0.752	0	0
175	5.807	1560	CC(C)NCCCC(C)Nc1cc(O)cc2cccnc12	0	9	9	3	9	0.305	8	0	2	9	0	-0.1049	-1.409	4.23175	2.667	4	0
176	5.807	1560	Oc1cc([N+]([O-])=O)c2ncccc2c1	0	9	9	7	8	0.6723	8	0	0	9	0	-0.1044	0.6032	2.37098	2.098	0	0
177	4.301	50000	Cc1[nH]c2c(N)cccc2c1C	0	8	8	8	8	0.1381	8	0	0	8	0	-0.1729	0.0508	1.78414	1.137	2	0
178	4.301	50000	Nc1ccc2[nH]ccc2c1	0	8	8	8	8	0.0759	8	0	0	8	0	-0.1437	-0.9093	2.37649	0.72	0	0
179	4.301	50000	Oc1ccc2[nH]ccc2c1	0	8	8	8	8	0.17	8	0	0	8	0	-0.1001	-0.2757	1.76219	1.131	0	0
180	4.301	50000	CCOC(=O)Cc1c[nH]c2ccc(N)cc12	0	8	8	5	8	0.0836	8	0	0	8	0	-0.1185	-0.8085	1.77899	0.846	2	0
181	5.807	1560	Nc1cc2C(=O)c3ccccc3C(=O)c2c(O)c1O	0	14	12	9	14	0.606	12	0	0	0	0	-0.2481	-0.8261	2.56369	0.994	0	0
182	4.301	50000	Nc1ccc(Cc2ccccc2)c(O)c1	0	12	12	7	12	0.1509	11	0	0	0	0	-0.4394	1.112	3.91119	1.968	0	0
183	4.301	50000	Nc1ccc(CSc2ccc(Cl)cc2)c(O)c1	0	12	12	7	12	0.205	12	0	0	0	0	-0.2715	1.3755	4.54728	1.711	1	0
184	4.301	50000	Cc1ccc(OC(=O)c2ccc(N)cc2O)cc1	0	12	12	5	12	0.3948	7	0	0	0	0	-0.2815	0.7599	2.22162	2.368	1	0
185	5.504	3130	Nc1cc(N)c2cccnc2c1O	0	9	9	8	9	0.4388	9	0	0	9	0	-0.1083	-2.0035	3.43404	0.897	0	0
186	5.807	1560	Nc1cc2ccccc2c(O)c1O	0	10	10	8	10	0.4462	10	0	0	0	0	-0.2685	-0.3751	2.94149	1.951	0	0
187	4.301	50000	Nc1cc(O)c2[nH]nnc2n1	0	5	5	4	4	0.6447	4	1	0	5	0	0	-0.7388	0.63768	-0.261	0	0
188	5.807	1560	[O-][N+](=O)c1ccc2[nH]c(=O)[c-](C3=[NH+]c4ccccc4C3=O)c2c1	0	16	6	6	11	0.3214	8	0	0	0	0	-0.1607	-2.1181	2.25888	2.552	0	1
189	4.301	50000	Oc1ccc(C(=O)COc2ccccc2Cl)c(O)c1	0	12	12	5	12	0.5576	10	0	0	0	0	-0.2402	0.7872	3.88428	1.973	1	0
190	4.301	50000	Cc1nnc(SCC(=O)c2ccc(O)cc2O)[nH]1	0	8	8	4	8	0.6508	8	0	0	3	0	-0.0636	0.293	1.60211	2.112	2	0
191	4.301	50000	Nc1cc(N)nc(SCC(=O)Nc2nncs2)n1	0	6	6	2	6	0.7319	4	0	0	6	0	0	-0.0857	1.35617	-0.526	1	1
192	4.301	50000	Cc1nnc(NC(=O)CSc2nc(N)cc(N)n2)s1	0	6	6	2	6	0.7425	3	0	0	6	0	0	-0.0069	0.16889	-0.675	2	1
193	4.301	50000	CCc1nnc(SCC(=O)c2ccc(O)cc2O)[nH]1	0	8	8	3	8	0.6536	6	0	0	3	0	-0.0636	0.3692	1.67659	2.365	2	0
194	4.301	50000	CCc1cc(C(=O)Cc2cscn2)c(O)cc1O	0	9	9	5	9	0.457	9	0	0	6	0	-0.0476	0.0203	2.5421	1.956	1	0
195	4.301	50000	CCc1cc(C(=O)Cc2ccc(F)cc2)c(O)cc1O	0	12	12	6	12	0.4596	10	0	0	0	0	-0.2493	1.0815	3.2247	1.917	1	0
196	4.301	50000	Nc1nonc1NC(=O)CSc1nc(N)cc(N)n1	0	6	6	1	4	0.8667	4	0	0	6	0	0	-1.7912	-0.09704	-1.37	1	1
197	4.301	50000	Nc1cc(N)nc(SCCOc2ccccc2F)n1	0	10	10	8	10	0.7742	10	0	0	4	0	-0.1568	0.3769	3.96547	0.239	2	0
198	4.301	50000	COc1ccc(cc1)C(=O)c1c(C)n(C)c(=O)n(C)c1=O	0	10	10	4	8	0.8839	6	0	0	7	0	-0.1336	-1.2841	1.71749	0.117	1	0
199	4.301	50000	Nc1cc(=O)[nH]c(SCC(=O)c2ccc3OCOc3c2)n1	0	11	10	4	9	0.9467	8	0	0	5	0	-0.0686	-0.9755	1.50918	-0.182	1	0
200	4.301	50000	OCCCNc1cc(=O)oc2ccccc12	0	9	9	5	8	0.6073	8	0	0	0	0	-0.187	-0.5211	-1.04652	0.975	2	0
201	4.301	50000	CCCC(C)C(=O)Nc1cc(OC)ccc1OC	0	6	6	5	6	0.3475	6	0	0	0	0	-0.0311	-0.3617	2.69789	2.559	2	1
202	4.301	50000	CC1(C)CC(=O)c2c(O)cc(O)cc2O1	0	9	6	9	9	0.5422	9	0	0	0	0	0	-0.1542	1.8416	1.186	2	0
203	4.301	50000	Cn1c(NCc2ccc3OCOc3c2)nc2n(C)c(=O)n(C)c(=O)c12	0	12	11	3	7	1.4685	5	0	0	8	0	-0.1073	-1.851	1.74847	0.554	1	0
204	4.301	50000	Cn1c2nc(CN3CCc4ccccc4C3)n(CCCO)c2c(=O)n(C)c1=O	0	14	11	3	8	1.0619	5	1	0	6	0	-0.3101	-1.6062	1.02579	-0.147	5	0
205	4.301	50000	O=C1N(Cc2ccc3OCOc3c2)C(=O)c2ccccc12	0	15	12	4	10	0.4315	8	1	0	0	0	-0.3263	0.4774	0.20028	1.046	1	1
206	4.301	50000	Nc1cc(=O)[nH]c2nnc(SCC#N)n12	0	5	5	3	3	0.8439	3	0	0	5	0	0	0.1043	0.09976	0.28	1	0
207	3.456	350000	CSc1nc(C)nc(N)n1	0	3	3	2	2	0.5415	2	0	0	3	0	0	-0.6062	0.5019	-0.473	1	0
208	5.807	1560	Nc1ncc(\N=N\c2ccccc2)c(n1)-c1ccc(Cl)cc1Cl	0	16	16	6	13	0.7095	11	0	0	11	0	-0.3668	1.8374	6.40007	2.671	0	0
209	6.046	900	CCOc1ccc(cc1)-c1c(C#N)c(N)nc2sc(C(N)=O)c(N)c12	0	13	13	8	13	0.6723	12	2	0	10	0	-0.1554	-0.3441	3.39665	0.018	2	1
210	5.244	5700	CCNC(=O)c1cc2c(nc(N)nc2s1)-c1ccccc1	0	12	12	7	11	0.525	8	1	0	12	0	-0.3201	1.1088	3.49427	0.441	2	1
211	6.143	720	CCNC(=O)c1cc2c(nc(N)nc2s1)-c1ccc(Cl)cc1	0	12	12	7	11	0.5661	9	1	0	12	0	-0.2192	1.4775	4.14767	0.385	2	1
212	6.469	340	CCNC(=O)c1cc2c(nc(N)nc2s1)-c1ccc(C)cc1C	0	12	12	7	11	0.5281	9	1	0	12	0	-0.2879	2.0016	3.55031	1.225	4	1
213	6.523	300	CCNC(=O)c1cc2c(nc(N)nc2s1)-c1ccc(cc1C)C#N	0	12	12	7	11	0.5803	9	2	0	12	0	-0.2068	1.3943	3.39397	-0.159	3	1
214	6.638	230	CCNC(=O)c1cc2c(nc(N)nc2s1)-c1ccc(Cl)cc1Cl	0	12	12	8	11	0.6387	10	1	0	12	0	-0.1481	1.8462	4.80107	0.962	2	1
215	6.754	176	CCNC(=O)c1cc2c(nc(N)nc2s1)-c1cc(OC2CCN(CC)C2)c(Cl)cc1Cl	0	16	12	8	15	0.824	14	1	0	12	0	-0.0599	1.296	5.27407	1.663	6	1
216	7.06	87	CCNC(=O)c1cc2c(nc(N)nc2s1)-c1cc(OCCNC2CCCCC2)c(Cl)cc1Cl	0	18	12	7	17	0.8236	14	1	0	12	0	-0.0599	-0.6423	6.10217	2.644	4	1
217	5.077	8374	CC(C)Sc1nc(SCC(=O)NCc2ccco2)c2c3CC(C)(C)OCc3sc2n1	0	13	10	5	13	0.6933	9	1	1	6	0	-0.0633	1.634	3.69698	1.862	7	1
218	6.082	827	O=P(Nc1nccs1)(c1nc2ccccc2s1)c1ccccc1	0	16	16	5	15	0.514	10	0	0	15	0	-0.4871	2.0899	4.31917	0.964	0	0
219	5.233	5853	CCOC(=O)C1CCCN(C1)C(=O)c1sc2nc(cn2c1C)-c1ccc(OC)cc1	0	16	11	5	8	0.5673	6	1	1	11	0	-0.1368	0.3282	3.4259	2.273	5	1
220	4.776	16748	COC(=O)NCCOC(=O)N(O)c1ccc(Br)cc1	0	6	6	4	6	0.0855	6	0	0	0	2	-0.1654	0.9065	1.75669	0.446	2	2
221	5.599	2520	Cc1cc2ccccc2n1CCNC(=O)c1ccccc1	0	14	14	2	8	0.1029	7	1	0	9	0	-0.5275	1.8309	3.4498	2.525	3	1
222	4.452	35282	O=C(CN1C(=O)c2ccccc2S1(=O)=O)N1CCc2ccccc12	0	15	12	2	13	0.2254	8	1	0	0	0	-0.4455	-0.1074	2.29977	-0.517	2	2
223	5.34	4567	Cc1cc2ccccc2n1CCNC(=O)c1cccs1	0	12	12	1	8	0.14	7	1	0	9	0	-0.3647	1.1815	3.5113	2.242	3	1
224	6.138	728.49	Cc1cc(NO)nc(n1)-c1ccc(Br)cc1	0	10	10	7	10	0.4012	9	0	0	10	0	-0.1942	-0.5805	2.43171	0.485	1	0
225	5.184	6547	CCOC(=O)c1sc(NC(=O)c2ccc(C)o2)nc1C	0	7	7	5	7	0.6401	6	0	1	5	0	-0.0312	1.1116	2.22652	1.035	4	1
226	5.97	1072	COC(=O)c1ccc(COc2ccc3c(C)c(C)c(=O)oc3c2)o1	0	13	13	4	11	1.0444	10	0	0	0	0	-0.1219	1.4081	3.49198	2.6	3	0
227	5.426	3752	COC(=O)C[C@@]1(CN(C#N)N(c2ccc(Cl)cc2)C11c2ccccc2-c2ccccc12)C(=O)OC	0	21	18	11	21	0.091	17	1	1	0	0	-0.6642	2.9251	4.50647	1.964	1	0
228	5.028	9385	CC(=O)CSc1nnc(o1)-c1ccc2OCOc2c1	0	9	8	3	6	0.9028	5	0	1	8	0	-0.0651	0.7666	2.53387	2.145	2	0
229	5.142	7206	Cc1nc2ccc(cc2[nH]1)C(O)=O	0	7	7	6	7	0.3221	7	0	0	7	0	-0.1014	-0.3923	1.67231	0.53	1	0
230	5.153	7023	COC(=O)c1ccc(COc2ccc(CC=C)cc2OC)o1	0	10	10	6	9	0.6793	9	0	0	0	0	-0.1487	1.0477	3.45058	2.9	1	0
231	5.227	5930	Nc1c(cnn1-c1ccc(cc1)C(O)=O)-c1ccccc1	0	15	15	6	12	0.3548	9	0	0	14	0	-0.4674	1.2396	4.40578	2.115	0	0
232	5.621	2392	COc1cccc(CNc2cccc(c2)C(O)=O)c1OCC=C	0	12	12	4	11	0.4324	9	0	0	0	0	-0.3021	0.9398	4.31258	1.874	2	0
233	5.612	2446	CCCCOc1ccc(cc1)-c1cc(C(=O)NNC(=S)NCC)c2ccccc2n1	0	15	15	5	13	0.3278	9	1	0	15	0	-0.368	0.7691	4.40434	3.62	4	3
234	5.536	2910	Cc1nc(NC(=O)\C=C\c2ccccc2)sc1C(=O)Nc1ccccc1Cl	0	15	15	4	13	0.4377	8	0	0	4	0	-0.519	2.782	4.18998	2.657	1	2
235	5.416	3836	Cc1nc(NC(=O)c2ccc(F)cc2)sc1C(=O)Nc1ccc2CCCc2c1	0	18	15	4	15	0.5181	8	0	0	7	0	-0.3655	1.4076	3.89278	1.672	1	2
236	4.75	17786	Cc1ccc(\C=C2/SC(=S)N(CCCC(=O)Nc3ccccn3)C2=O)cc1	0	14	11	4	11	0.1545	7	0	0	5	0	-0.4215	1.7012	3.07836	2.409	2	2
237	5.671	2133	CCC(=O)Nc1ccccc1C(=O)OCC(=O)c1ccccc1	0	12	12	4	12	0.1484	8	0	0	0	0	-0.4927	0.8634	2.69419	1.848	2	1
238	5.287	5166	Cc1ccc2nc(NC(=O)CSCC(=O)OCC(=O)c3ccccc3)sc2c1	0	13	13	0	9	0.3077	3	0	1	7	0	-0.47	2.3032	2.4991	1.303	4	1
239	5.794	1606	Cc1ccc(cc1)S(=O)(=O)c1c(NS(=O)(=O)c2ccccc2)n(CC=C)c2nc3ccccc3nc12	0	22	22	6	15	0.9925	10	0	0	16	0	-0.6759	2.1669	4.92046	3.862	2	0
240	5.584	2609	O=C(OCc1ccccn1)c1ccc(COc2ccc3ccccc3c2)o1	0	19	19	3	16	0.5832	10	0	0	6	0	-0.5089	0.4658	4.77043	2.808	2	0
241	4.536	29088	[O-][N+](=O)c1ccc(cc1)S(=O)(=O)N1CCN(CC1)C(=O)Cc1ccccc1	0	16	12	5	9	0.414	7	1	0	0	0	-0.3973	0.8876	2.04329	0.841	4	1
242	5.515	3053	CCOc1ccc(cc1)-c1nc(CN(C[C@@H]2CCC(=O)N2)Cc2ccccc2)c(C)o1	0	19	15	2	11	0.609	5	1	0	10	0	-0.463	1.3578	4.36001	2.098	6	1
243	5.426	3749	CC(=O)Nc1ccc(OS(=O)(=O)c2ccc(cc2)[N+]([O-])=O)cc1	0	12	12	5	11	0.6273	8	0	0	0	0	-0.1584	0.662	2.31318	-0.186	1	1
244	5.135	7324	COc1cc(\C=C\[N+]([O-])=O)ccc1OCc1cccc(c1)C(O)=O	0	12	12	6	12	0.3837	9	0	0	0	0	-0.3057	0.9441	3.05738	1.582	1	0
245	5.017	9627	CCOc1ccc(cc1)-c1nc(CN2CCCCC2CCn2cccn2)c(C)o1	0	17	12	4	10	0.6839	9	1	0	12	0	-0.1546	-0.2949	5.06001	3.137	6	0
246	6.629	235.15	CN(Cc1nc(oc1C)-c1ccc(cc1)-c1ccccc1)C1CCOC1	0	19	15	5	9	0.4883	8	1	2	9	0	-0.5322	1.9586	4.40061	3.292	4	0
247	5.783	1650	Cc1ccc(\C=C2\C(=O)c3ccc(cc3C2=O)C(O)=O)o1	0	13	10	6	12	0.3583	11	0	0	0	0	-0.1694	0.6488	2.26651	0.397	1	0
248	5.194	6399	Cc1nc(NC(=O)c2cccc(Cl)c2)sc1C(=O)N1CCCCC1	0	14	9	3	10	0.4034	6	1	0	6	0	-0.1838	0.6235	3.67279	1.44	3	2
249	5.446	3583	COc1ccc(cc1)C(=O)Nc1nc(C)c(s1)C(=O)OCC=C	0	9	9	5	9	0.5047	9	0	1	6	0	-0.1308	1.8598	3.22638	1.243	2	1
250	5.622	2388	COc1cccc(c1)-c1cc2nc3CCCCc3c(NCC(C)(C)CN(C)C)n2n1	0	16	12	5	11	0.5815	9	0	3	12	0	-0.1406	1.4191	5.23778	2.901	4	0
251	5.064	8620	CC1CC(C)CN(CCCNC(=O)C2CCN(CC2)c2nc3c(C)cc(C)cc3s2)C1	0	17	7	5	6	0.2863	6	0	1	7	0	-0.1694	0.8035	4.98522	3.282	10	1
252	5.007	9851	OC(=O)c1cccc(NC(=S)NC(NC(=O)c2cccc(c2)[N+]([O-])=O)C(Cl)(Cl)Cl)c1	0	12	12	1	11	0.4542	6	1	0	0	1	-0.2777	3.3993	3.50999	2.499	2	3
253	5.793	1612	CC(=O)Nc1ccc(NC2=CC(=NS(=O)(=O)c3cccs3)c3ccccc3C2=O)cc1	0	20	16	5	12	0.2602	9	1	0	0	0	-0.4818	-0.0353	4.13627	1.639	1	1
254	5.601	2504	CS(=O)(=O)c1ccc(cc1)-c1cn2cc(ccc2n1)C(O)=O	0	13	13	6	11	0.4558	9	0	0	13	0	-0.2349	-0.666	3.07048	0.664	0	0
255	5.708	1961	COc1ccc(cc1)N(N=C1Sc2ccccc2C1=O)C(C)=O	0	14	12	5	12	0.2439	10	1	0	0	0	-0.3247	0.9556	3.43056	1.716	1	1
256	6.056	880	CCOC(=O)c1csc(NC(=O)c2ccc(OCC)cc2)n1	0	9	9	5	9	0.4913	9	0	1	6	0	-0.1308	1.2301	2.53548	1.623	4	1
257	5.179	6625	CC(=O)Oc1ccc(Nc2ccccc2)cc1	0	12	12	7	10	0.1945	8	0	0	0	0	-0.3718	0.9648	4.45638	1.793	1	0
258	4.943	11403	COCC(C)n1c(C)cc(C(=O)Cn2nc(C(O)=O)c3ccccc3c2=O)c1C	0	12	12	5	8	0.6062	6	0	0	12	0	-0.2527	0.3659	2.04523	1.023	5	0
259	5.879	1321	COc1cc(CN=Nc2ccc(Cl)c(c2)C(O)=O)ccc1OC(=O)c1cccs1	0	16	16	5	8	0.6533	6	1	0	0	0	-0.3112	1.407	5.67038	2.879	1	0
260	5.429	3728	COCCn1c(C)cc(C(=O)Cn2nc(C(O)=O)c3ccccc3c2=O)c1C	0	12	12	5	10	0.6056	8	0	0	12	0	-0.2527	0.3766	1.48423	0.563	5	0
261	4.631	23372	Cc1cc(C(=O)Cn2nc(C(O)=O)c3ccccc3c2=O)c(C)n1C	0	12	12	4	9	0.6048	7	0	0	12	0	-0.2527	0.5075	1.32012	0.753	3	0
262	4.989	10262	CCOC(=O)c1ccc(cc1)-c1ccc(C=O)o1	0	10	10	7	10	0.3796	8	0	0	0	0	-0.2226	0.9693	2.9842	1.36	2	0
263	5.47	3390	Nc1cc(ccc1O)-c1ccccc1	0	12	12	9	12	0.2046	11	0	0	0	0	-0.4239	0.6558	3.79809	2.508	0	0
264	5.641	2288	CCC(C)c1ccc(OCc2ccc(o2)C(=O)OC)cc1	0	10	10	5	9	0.4761	9	0	0	0	0	-0.2188	0.4143	3.8	3.552	3	0
265	5.296	5053	Cc1ccc2oc(=O)c(CC(=O)c3cccs3)nc2c1	0	12	12	4	11	0.8118	7	0	0	10	0	-0.2717	1.0218	3.33009	3.094	1	0
266	5.29	5130	Cc1ccc2oc(=O)c(CC(=O)c3ccco3)nc2c1	0	12	12	4	11	1.0199	7	0	0	10	0	-0.1862	0.2771	2.86159	2.732	1	0
267	5.243	5721	OC(=O)c1cc(ccc1Cl)N=NCc1cccnc1	0	11	11	5	8	0.2809	8	1	0	5	0	-0.1963	0.0654	3.61325	1.334	1	0
268	5.049	8931	OC(=O)c1cccc(c1)N1C(=S)S\C(=C/c2nc3ccccc3[nH]2)C1=O	0	16	13	3	8	0.3932	5	0	0	7	1	-0.3623	1.7185	3.02687	0.834	0	1
269	5.094	8052	CNC(=S)NN=Cc1ccc(o1)-c1ccc(cc1)C(O)=O	0	10	10	7	10	0.3599	10	1	0	0	0	-0.2243	0.9998	2.01869	1.696	0	2
270	5.658	2200	Clc1ccc2oc(=O)c(CC(=O)c3cccs3)nc2c1	0	12	12	6	11	0.8562	9	0	0	10	0	-0.1916	0.9441	3.34726	3.279	0	0
271	5.563	2733	Clc1ccc2oc(=O)c(CC(=O)c3ccco3)nc2c1	0	12	12	5	11	1.0643	9	0	0	10	0	-0.1061	0.1994	2.87876	2.917	0	0
272	5.857	1390	O=C(CN1C(=O)c2ccccc2S1(=O)=O)c1ccc2OCCOc2c1	0	15	12	3	10	0.5334	8	1	0	0	0	-0.2717	-0.7354	2.98047	-0.185	3	1
273	4.918	12072	Cc1nc(CS(=O)(=O)c2ccc(Cl)cc2)sc1C(O)=O	0	9	9	7	9	0.4089	9	0	0	6	0	-0.1542	1.0975	2.64321	0.309	2	0
274	5.333	4640	Cc1ccc(cc1)C(=O)CN1C(=O)c2ccccc2S1(=O)=O	0	13	12	4	12	0.205	8	1	0	0	0	-0.4716	0.8896	2.76811	0.57	2	1
275	5.095	8030	CCOC(=O)c1csc(COc2ccc(OC)cc2)n1	0	9	9	5	9	0.5231	9	0	1	6	0	-0.066	0.489	2.58099	1.894	3	0
276	5.797	1596	Cc1c(-c2nc(no2)-c2ccc(cc2)C(F)(F)F)n(C)oc1=O	0	11	11	3	8	1.1365	6	0	0	11	0	-0.1996	2.1255	2.77168	2.262	2	0
277	5.555	2785	ON(C=c1c(=C)[nH]n(-c2ccccc2)c1=O)c1ccccc1	0	15	15	7	14	0.5635	11	0	0	10	0	-0.5064	-0.7595	3.31937	1.38	0	0
278	5.428	3733	COC(=O)c1ccc(cc1)N=CCC(=O)c1ccccc1	0	12	12	6	12	0.1404	12	0	0	0	0	-0.4493	1.7168	3.34619	1.49	0	0
279	5.493	3214	COC(=O)c1cc(C)nc2C(=CC(=O)C(=O)c12)N1CCOCC1	0	13	5	7	10	0.2771	9	1	0	5	0	-0.0259	-0.4	0.07276	0.312	5	0
280	5.092	8088	CC(=O)CSc1ccc(cn1)-c1nc2ccccc2[nH]1	0	12	12	6	9	0.4689	7	0	1	12	0	-0.2659	-0.3749	2.92083	1.089	2	0
281	4.679	20942	Cc1[nH]n(-c2ccccc2)c(=O)c1N=Nc1ccc(cc1)C(N)=O	0	15	15	3	8	0.7239	5	1	0	10	0	-0.4164	0.1415	2.24196	1.719	1	1
282	5.264	5444	Cc1cccc(c1)N(O)C(=O)Nc1cccc(Cl)c1	0	12	12	3	11	0.1448	7	0	0	0	2	-0.4042	1.7334	2.7648	1.321	1	2
283	5.357	4400	CC(=O)c1ccc(cc1)N=Nc1c(C)[nH]n(-c2ccccc2)c1=O	0	15	15	3	7	0.7045	5	0	0	10	0	-0.4198	0.5224	3.50268	2.709	2	0
284	5.483	3286	COc1ccc(\C=C\c2noc(n2)-c2ccccc2OC(C)=O)cc1	0	14	14	1	7	0.8033	4	0	0	11	0	-0.3491	1.2057	4.02457	2.572	1	0
285	6.363	433.36	Fc1ccc-2c(c1)C(=O)c1nc3ccccc3c(=O)n-21	0	15	14	6	12	0.8388	9	0	0	14	0	-0.2757	-0.1124	0.05317	0.391	0	0
286	5.527	2975	[O-][N+](=O)\C=C\c1ccc2n(Cc3ccccc3)ccc2c1	0	14	14	8	11	0.0559	9	0	0	14	0	-0.5157	1.7966	3.88559	2.691	1	0
287	5.275	5309	CC(=O)Oc1ccccc1\C=C\c1nc2ccccc2c(=O)o1	0	14	14	1	8	0.895	5	0	0	11	0	-0.3906	1.0328	1.19047	2.127	1	0
288	5.204	6252	CN(C)c1ccc(cc1)C1Nc2cccc3cccc(N1)c23	0	17	16	8	17	0.1297	13	0	0	0	0	-0.5183	1.3244	5.22808	2.501	1	0
289	5.823	1504	COc1ccc(cc1)C(=O)Oc1ccc(CN=Nc2ccc(Cl)c(c2)C(O)=O)cc1OC	0	18	18	6	8	0.7363	7	1	0	0	0	-0.3202	1.5578	6.11827	2.769	1	0
290	5.097	8006	CC1CCN(CC1)c1ccc(nn1)-c1cccc(NC(=O)C(F)(F)F)c1	0	15	10	5	10	0.2755	10	0	0	10	0	-0.232	0.4771	4.07558	3.92	4	1
291	5.418	3822	COC(=O)c1ccc2nc(NC(=O)C3CC3)sc2c1	0	10	7	6	9	0.3475	8	0	2	7	0	-0.112	1.2008	1.50838	0.319	0	1
292	4.991	10206	[O-][N+](=O)c1ccc(cc1)\[NH+]=N\c1ncc[n-]1	0	9	9	4	5	0.7105	5	0	0	6	0	-0.1543	0	2.50703	0	0	0
293	5.881	1314	O=C1NC(=O)\C(N1)=C\c1cn(CC#C)c2ccccc12	0	11	8	5	9	0.0736	7	0	0	8	0	-0.2105	0.2537	2.25384	1.443	1	2
294	4.968	10764	Cc1ccc(cc1)C(=O)CSc1ccccc1C(O)=O	0	12	12	5	12	0.1127	8	0	0	0	0	-0.4846	2.3004	2.82091	2.09	2	0
295	5.261	5479	CCN(CC)c1ccc(cc1)-c1sc(Nc2ccc(CC)cc2)n[n+]1-c1ccccc1	0	20	20	3	13	0.9106	6	0	0	19	0	-0.5854	4.0363	8.00245	5.339	5	0
296	5.892	1283	CCc1ccc(cc1)S(=O)(=O)N=C1C=C(Nc2ccc(O)cc2)C(=O)c2ccccc12	0	22	18	6	12	0.3066	7	1	0	0	0	-0.5652	0.5267	5.36507	2.733	1	0
297	5.775	1677	Cc1cc(C)c(c(C)c1)S(=O)(=O)N=C1C=C(Nc2ccc(cc2)C(O)=O)C(=O)c2ccccc12	0	22	18	6	12	0.2541	8	1	0	0	0	-0.5997	1.8823	4.83173	2.245	3	0
298	5.899	1261	COC(=O)c1ccccc1NC1=CC(=NS(=O)(=O)c2ccc(cc2)C(O)=O)c2ccccc2C1=O	0	22	18	4	12	0.3424	7	1	0	0	0	-0.5907	0.3587	3.98178	1.774	0	0
299	5.31	4898	COc1ccccc1Nc1nn2c(nc3cc(ccc3c2=O)C(=O)NCc2cccnc2)s1	0	20	20	4	7	1.1309	7	1	0	19	0	-0.4015	-0.9319	1.36652	0.449	1	1
300	5.977	1054	COC(=O)C1CCN(CC1)C(=O)c1ccc2nc(oc2c1)-c1cccc(OC)c1	0	18	13	6	10	0.6965	7	1	0	13	0	-0.2188	-0.2306	3.85357	1.258	2	1
301	5.166	6823	COc1ccc(cc1)-c1cc2n(cnn(CC(=O)NCCCN3CCC(Cc4ccccc4)CC3)c2=O)n1	0	22	17	2	6	0.7832	3	0	0	11	1	-0.4889	-0.9803	3.62479	2.867	5	1
302	5.758	1746	Cc1ccc(OCc2ccc(o2)C(O)=O)cc1C	0	10	10	4	9	0.4762	9	0	0	0	0	-0.2083	1.355	2.25414	2.086	3	0
303	6.044	904	CCCc1ccc(OCc2ccc(o2)C(=O)N2CCSCC2)cc1	0	14	10	5	14	0.4542	11	1	1	0	0	-0.2241	0.3343	3.58669	3.42	6	1
304	6.037	919	Cc1ccc(c(C)c1)S(=O)(=O)N=C1C=C(Nc2cccc(c2)C(O)=O)C(=O)c2ccccc12	0	22	18	6	12	0.2537	9	1	0	0	0	-0.6169	1.4359	4.80371	2.064	2	0
305	5.376	4203	Clc1ccccc1C(=O)CN1C(=O)c2ccccc2S1(=O)=O	0	13	12	4	11	0.2747	7	1	0	0	0	-0.4166	0.8119	2.78528	0.333	1	1
306	5.319	4795	[O-][N+](=O)c1ccc(cc1)S(=O)(=O)N1CCN=C1SCc1ccc(F)cc1	0	15	12	5	14	0.5407	9	1	0	0	0	-0.257	2.3053	2.95868	1.492	3	0
307	5.91	1231	CCOC(=O)c1csc(NC(=O)c2ccc3OCCOc3c2)n1	0	11	9	6	11	0.6992	8	0	1	6	0	-0.0657	0.2997	2.40877	1.23	4	1
308	8.301	5	COc1cccc(n1)-c1cc(F)ccc1[C@H]1Cc2nc(N)nc(C)c2C(NOC2C[C@H](O)[C@H](O)C2)=N1	0	23	15	8	20	0.8852	15	2	2	15	0	-0.1841	-1.7215	1.16937	-0.281	1	0
309	6.921	120	NC(=O)c1ccc(cc1N[C@H]1CC[C@H](O)CC1)-n1nc(c2c(ccnc12)-c1cnc2ccccc2c1)C(F)(F)F	0	27	21	8	15	0.7071	10	1	1	21	0	-0.3855	-0.1715	5.95186	2.717	1	1
310	6.886	130	Cc1nn(-c2ccc(C(N)=O)c(N[C@H]3CC[C@H](O)CC3)c2)c2nccc(-c3cnc4ccccc4c3)c12	0	27	21	6	13	0.5926	10	1	1	21	0	-0.3858	-1.2597	5.30218	2.018	1	1
311	6.77	170	CCc1nn(-c2ccc(C(N)=O)c(N[C@H]3CC[C@H](O)CC3)c2)c2nccc(-c3cnc4ccccc4c3)c12	0	27	21	6	13	0.5956	11	1	1	21	0	-0.3858	-1.1835	5.78185	2.271	1	1
312	6.367	430	CC(C)c1nn(-c2ccc(C(N)=O)c(N[C@H]3CC[C@H](O)CC3)c2)c2nccc(-c3cnc4[nH]ccc4c3)c12	0	25	19	6	12	0.6898	11	1	1	19	0	-0.2104	-2.6026	5.65306	3.598	2	1
313	6.745	180	CC(C)c1nn(-c2ccc(C(N)=O)c(NCCN3CCCC3)c2)c2nccc(-c3cnc4ccccc4c3)c12	0	25	21	7	13	0.5985	10	1	0	21	0	-0.3858	0.6614	6.13515	2.336	6	1
314	6.31	490	CSCCCNc1cc(ccc1C(N)=O)-n1nc(C(C)C)c2c(ccnc12)-c1cnc2ccccc2c1	0	21	21	5	14	0.5985	8	1	1	21	0	-0.3858	-0.4614	6.246	5.978	4	1
315	6.638	230	CC(C)c1nn(-c2ccc(C(N)=O)c(NC3CCN(C)CC3)c2)c2nccc(-c3cnc4ccccc4c3)c12	0	26	21	6	13	0.5987	11	1	0	21	0	-0.3858	-1.3772	4.98701	4.98	4	1
316	5.896	1270	CC(C)c1nn(-c2ccc(C(N)=O)c(NCC(C)(C)C)c2)c2nccc(-c3cnc4ccccc4c3)c12	0	21	21	5	14	0.5985	8	1	1	21	0	-0.3858	2.7456	7.08545	3.45	6	1
317	6.62	240	CC(C)c1nn(-c2ccc(C(N)=O)c(NCCN(C)C)c2)c2nccc(-c3cnc4ccccc4c3)c12	0	21	21	7	13	0.5985	9	1	1	21	0	-0.3858	1.4188	5.60095	1.83	4	1
318	6.398	400	CC(C)c1nn(-c2ccc(C(N)=O)c(NCCc3ccccn3)c2)c2nccc(-c3cnc4ccccc4c3)c12	0	26	26	6	13	0.6692	10	1	0	26	0	-0.5283	0.7365	6.9208	2.178	3	1
319	6.495	320	CC(C)c1nn(-c2ccc(C(N)=O)c(NCCCN(C)C)c2)c2nccc(-c3cnc4ccccc4c3)c12	0	21	21	7	13	0.5985	9	1	1	21	0	-0.3858	-0.9365	4.84451	4.795	4	1
320	6.481	330	CC(C)c1nn(-c2ccc(C(N)=O)c(NCCN3CCOCC3)c2)c2nccc(-c3cnc4ccccc4c3)c12	0	25	21	6	13	0.5985	10	1	0	21	0	-0.3858	-0.9608	4.22501	4.037	8	1
321	5.943	1140	CC(C)c1nn(-c2ccc(C(N)=O)c(Nc3ccc(cc3)N3CCOCC3)c2)c2nccc(-c3cnc4ccccc4c3)c12	0	31	27	5	12	0.6643	9	1	0	22	0	-0.5409	1.5931	7.80774	2.916	6	1
322	6.244	570	CC(C)c1nn(-c2ccc(C(N)=O)c(Nc3ccc(cc3)C(=O)N3CCCC3)c2)c2nccc(-c3cnc4ccccc4c3)c12	0	31	27	6	13	0.6714	8	2	0	22	0	-0.5609	0.7512	8.15243	2.633	4	2
323	5.824	1500	CC(C)c1nn(-c2ccc(C(N)=O)c(Nc3ccc(CN4CCCC4)cc3)c2)c2nccc(-c3cnc4ccccc4c3)c12	0	31	27	5	13	0.6343	9	2	0	22	0	-0.6103	-1.4175	7.0809	6.964	5	1
324	6.292	510	CC(C)c1nn(-c2ccc(cc2Cl)C(N)=O)c2nccc(-c3cnc4ccccc4c3)c12	0	21	21	7	12	0.6213	11	1	0	21	0	-0.4007	2.4137	6.28085	2.154	2	1
325	6.569	270	Cc1cn(-c2ccc(C(N)=O)c(N[C@H]3CC[C@H](O)CC3)c2)c2nccc(-c3cnc4ccccc4c3)c12	0	28	22	7	14	0.4798	12	1	1	22	0	-0.4133	-2.5335	4.35545	4.995	1	1
326	6.921	120	CCc1cn(-c2ccc(C(N)=O)c(N[C@H]3CC[C@H](O)CC3)c2)c2nccc(-c3cnc4ccccc4c3)c12	0	28	22	7	14	0.4804	11	1	1	22	0	-0.4105	-2.8686	4.83512	5.564	1	1
327	7	100	NC(=O)c1ccc(cc1N[C@H]1CC[C@H](O)CC1)-n1cc(c2c(ccnc12)-c1cnc2ccccc2c1)C(F)(F)F	0	28	22	9	15	0.5802	10	1	1	22	0	-0.3904	-0.3147	6.09696	3.243	1	1
328	7.046	90	CCCc1cn(-c2ccc(C(N)=O)c(N[C@H]3CC[C@H](O)CC3)c2)c2nccc(-c3cnc4ccccc4c3)c12	0	28	22	7	14	0.4804	9	1	2	22	0	-0.4102	-3.3498	5.22522	6.133	1	1
329	6.824	150	NC(=O)c1ccc(cc1N[C@H]1CC[C@H](O)CC1)-n1cc(C=C)c2c(ccnc12)-c1cnc2ccccc2c1	0	28	22	9	17	0.4909	11	1	1	22	0	-0.3903	-2.468	4.73301	5.564	0	1
330	6.456	350	Cc1cn(-c2ccc(C(N)=O)c(NC3CCOCC3)c2)c2nccc(-c3cnc4ccccc4c3)c12	0	27	22	8	15	0.4798	10	1	1	22	0	-0.4133	0.185	5.37749	2.31	3	1
331	6.337	460	Cc1cn(-c2ccc(C(N)=O)c(NCC(C)(C)O)c2)c2nccc(-c3cnc4ccccc4c3)c12	0	22	22	8	14	0.4797	11	1	1	22	0	-0.4133	1.0877	4.96939	2.125	4	1
332	5.863	1370	CC(C)NCCCNc1cc(ccc1C(N)=O)-n1cc(C)c2c(ccnc12)-c1cnc2ccccc2c1	0	22	22	6	14	0.4796	9	1	1	22	0	-0.4133	-1.4534	4.98543	5.263	5	1
333	6.222	600	Cc1cn(-c2ccc(C(N)=O)c(N[C@H]3CC[C@H](N)CC3)c2)c2nccc(-c3cnc4ccccc4c3)c12	0	28	22	6	14	0.4798	11	1	1	22	0	-0.4133	-1.0604	5.46839	2.477	1	1
334	6.215	610	CC(=O)N[C@H]1CC[C@@H](CC1)Nc1cc(ccc1C(N)=O)-n1cc(C)c2c(ccnc12)-c1cnc2ccccc2c1	0	28	22	6	13	0.4798	10	1	1	22	0	-0.4133	-0.9354	6.19117	2.753	2	2
335	6.328	470	Cc1cn(-c2ccc(C(N)=O)c(N[C@H]3CC[C@@H](CC3)NS(C)(=O)=O)c2)c2nccc(-c3cnc4ccccc4c3)c12	0	28	22	3	16	0.4798	10	1	1	22	0	-0.4133	-2.9074	4.99315	4.912	1	1
336	6.377	420	Cc1cn(-c2ccc(C(N)=O)c(N[C@@H]3CCCC[C@H]3N)c2)c2nccc(-c3cnc4ccccc4c3)c12	0	28	22	8	14	0.4799	12	1	1	22	0	-0.4133	-2.8231	4.32185	4.928	1	1
337	6.444	360	Cc1cn(-c2ccc(C(N)=O)c(S[C@H]3CC[C@H](O)CC3)c2)c2nccc(-c3cnc4ccccc4c3)c12	0	28	22	8	16	0.4524	11	1	1	22	0	-0.4214	0.2402	6.18219	2.613	1	1
338	6.638	230	CCc1cn(-c2ccc(C(N)=O)c(NC3CCCCC3N)c2)c2nccc(-c3cnc4ccccc4c3)c12	0	28	22	7	14	0.4805	12	1	1	22	0	-0.4105	-1.3955	5.94806	2.941	1	1
339	6.602	250	CCc1cn(-c2ccc(C(N)=O)c(NC3CCN(C)CC3)c2)c2nccc(-c3cnc4ccccc4c3)c12	0	27	22	7	14	0.4804	10	1	0	22	0	-0.4105	-1.6432	4.62582	5.373	3	1
340	6.585	260	CCc1cn(-c2ccc(C(N)=O)c(N[C@H]3CC[C@H](N)CC3)c2)c2nccc(-c3cnc4ccccc4c3)c12	0	28	22	7	14	0.4804	11	1	1	22	0	-0.4105	-3.1582	4.80152	5.497	1	1
341	6.229	590	CCc1cn(-c2ccc(C(N)=O)c(NCCN3CCOCC3)c2)c2nccc(-c3cnc4ccccc4c3)c12	0	26	22	7	15	0.4803	11	1	0	22	0	-0.4105	-1.2268	3.86382	4.43	7	1
342	6.469	340	CCc1cn(-c2ccc(C(N)=O)c(NCCCCO)c2)c2nccc(-c3cnc4ccccc4c3)c12	0	22	22	9	15	0.4802	10	1	1	22	0	-0.4105	-2.1686	4.30412	4.984	3	1
343	6.509	310	CCNCCNc1cc(ccc1C(N)=O)-n1cc(CC)c2c(ccnc12)-c1cnc2ccccc2c1	0	22	22	7	15	0.4803	11	1	1	22	0	-0.4105	-1.2	4.74121	5.014	5	1
344	6.721	190	CC(C)c1nn(-c2ccc(C(N)=O)c(NC3CCNCC3)c2)c2nccc(-c3cnc4ccccc4c3)c12	0	26	21	5	13	0.5987	9	1	0	21	0	-0.3858	-1.9131	4.64481	4.741	4	1
345	6.745	180	CC(C)c1nn(-c2ccc(C(N)=O)c(c2)N(C2CCNCC2)C(C)=O)c2nccc(-c3cnc4ccccc4c3)c12	0	26	21	6	13	0.6083	11	1	0	21	0	-0.3852	-2.1176	4.2052	4.34	5	2
346	6.602	250	CC(C)c1nn(-c2ccc(C(N)=O)c(NC3CCN(CC3)C(=O)CN)c2)c2nccc(-c3cnc4ccccc4c3)c12	0	26	21	6	12	0.5987	9	1	0	21	0	-0.3858	-3.0792	3.84251	3.665	5	2
347	6.328	470	CC(C)c1nn(-c2ccc(cc2C)C(N)=O)c2nccc(-c3cnc4ccccc4c3)c12	0	21	21	6	12	0.5377	9	1	0	21	0	-0.4418	2.4914	5.71018	1.758	3	1
348	5.987	1030	CC(C)c1nn(-c2ccc(C(N)=O)c(C)c2)c2nccc(-c3cnc4ccccc4c3)c12	0	21	21	5	13	0.5377	11	1	0	21	0	-0.4419	2.4914	5.71018	1.969	3	1
349	6.081	830	Cc1cc(ccc1-n1nc(c2c(ccnc12)-c1cnc2ccccc2c1)C(F)(F)F)C(N)=O	0	21	21	4	13	0.6461	9	1	0	21	0	-0.4415	2.8552	5.26448	1.911	2	1
350	6.398	400	COc1ccc(cc1)-c1cn(cn1)-c1ccnc2n(nc(C(C)C)c12)-c1ccc(C(N)=O)c(c1)N(O)C1CCCCC1	0	27	21	6	11	0.9624	8	1	1	21	1	-0.2466	-3.4819	6.69184	5.06	2	1
351	7	100	CC(C)c1nn(-c2ccc(C(N)=O)c(c2)N(O)C2CCCCC2)c2nccc(-n3cnc(c3)-c3cccnc3)c12	0	26	20	7	14	0.926	9	1	1	20	1	-0.2024	-4.5691	4.65561	2.314	2	1
352	7	100	CC(C)c1nn(-c2ccc(C(N)=O)c(c2)N(O)C2CCCCC2)c2nccc(-n3cnc(c3)-c3ccncc3)c12	0	26	20	6	14	0.9014	9	1	1	20	1	-0.1786	-4.5691	4.65303	2.314	2	1
353	6.62	240	CC(C)c1nn(-c2ccc(C(N)=O)c(c2)N(O)C2CCCCC2)c2nccc(-n3cnc(c3)-c3cncnc3)c12	0	25	19	7	13	1.0771	9	1	1	19	1	-0.1098	-5.4757	4.78146	1.016	2	1
354	6.854	140	CC(C)c1nn(-c2ccc(C(N)=O)c(c2)N(O)C2CCCCC2)c2nccc(-n3cnc(c3C)-c3cccnc3)c12	0	26	20	5	13	0.9404	9	1	1	20	1	-0.2024	-4.0554	5.14353	2.55	3	1
355	6.167	680	CC(C)c1nn(-c2ccc(C(N)=O)c(NC3CCC(O)CC3)c2)c2nccc(-n3cnc(c3)-c3ccco3)c12	0	25	19	6	12	1.0832	10	1	1	19	0	-0.1522	-2.3231	6.06156	3.709	2	1
356	7.155	70	CC(C)c1nn(-c2ccc(C(N)=O)c(c2)N(O)C2CCCCC2)c2nccc(-n3cnc(c3)-c3cnn(C)c3)c12	0	24	18	7	14	0.9755	9	1	1	18	1	-0.1098	-3.3146	4.91595	2.905	2	1
357	6.638	230	CC(C)c1nn(-c2ccc(C(N)=O)c(NC3CCC(O)CC3)c2)c2nccc(-n3cnc(c3)-c3ccoc3)c12	0	25	19	6	12	1.034	10	1	1	19	0	-0.1294	-2.3231	6.06156	3.324	2	1
358	6.886	130	CC(C)c1nn(-c2ccc(C(N)=O)c(NC3CCC(O)CC3)c2)c2nccc(-n3cnc(c3)-n3ccnc3)c12	0	24	18	6	12	1.0626	10	1	1	18	0	-0.1147	-2.1558	4.96306	2.919	2	1
359	6.495	320	CC(C)c1nn(-c2ccc(C(N)=O)c(c2)N(O)C2CCCCC2)c2nccc(-n3cnc(c3)-c3cnn(Cc4ccccc4)c3)c12	0	30	24	4	12	0.9762	9	1	1	24	1	-0.434	-3.4053	6.29436	5.813	3	1
360	6.328	470	CC(C)c1nn(-c2ccc(C(N)=O)c(NC3CCC(O)CC3)c2)c2nccc(-n3cnc(c3)-c3cnn(CCOCc4ccccc4)c3)c12	0	30	24	4	12	0.9339	8	1	1	19	0	-0.4339	-2.2751	6.94755	5.221	5	1
361	7.222	60	CC(C)c1nn(-c2ccc(C(N)=O)c(NC3CCC(O)CC3)c2)c2nccc(-n3cnc(c3)-c3cn[nH]c3)c12	0	24	18	7	13	0.9301	9	1	1	18	0	-0.1147	-2.5894	4.70976	2.927	2	1
362	6.62	240	Cc1cn(-c2ccc(C(N)=O)c(NC3CCC(O)CC3)c2)c2nccc(-n3cnc(c3)-c3ccccc3)c12	0	28	22	6	14	0.6782	10	1	1	22	0	-0.4282	-1.7238	5.57299	3.219	1	1
363	6.284	520	CC(C)c1nn(-c2ccc(cc2Cl)C(N)=O)c2nccc(-n3cnc(c3)-c3cnn(C)c3)c12	0	18	18	4	12	0.9562	9	1	0	18	0	-0.1296	0.0854	5.54525	1.977	2	1
364	6.658	220	CC(C)c1nn(-c2ccc(cc2C=C)C(N)=O)c2nccc(-n3cnc(c3)-c3cnn(C)c3)c12	0	18	18	4	12	0.8776	9	1	0	18	0	-0.1419	0.2286	5.35214	2.044	2	1
365	6.921	120	CCCc1cc(ccc1-n1nc(C(C)C)c2c(ccnc12)-n1cnc(c1)-c1cnn(C)c1)C(N)=O	0	18	18	6	11	0.8728	8	1	1	18	0	-0.1673	-0.6532	5.84435	2.614	3	1
366	6.921	120	CC(C)c1nn(-c2ccc(cc2C(C)C)C(N)=O)c2nccc(-n3cnc(c3)-c3cnn(C)c3)c12	0	18	18	4	12	0.8731	9	1	0	18	0	-0.1645	0.094	6.01525	2.549	4	1
367	6.854	140	CC(C)c1nn(-c2ccc(cc2C2CC2)C(N)=O)c2nccc(-n3cnc(c3)-c3cnn(C)c3)c12	0	21	18	4	14	0.8731	10	1	0	18	0	-0.164	-0.2738	5.76925	2.209	2	1
368	6.469	340	CC(C)c1nn(-c2ccc(C(N)=O)c(N)c2)c2nccc(-n3cnc(c3)-c3cnn(C)c3)c12	0	18	18	4	12	0.9305	9	1	0	18	0	-0.115	-1.48	4.47405	1.337	2	1
369	6.699	200	CC(C)c1nn(-c2ccc(cc2N)C(N)=O)c2nccc(-n3cnc(c3)-c3cnn(C)c3)c12	0	18	18	4	12	0.9429	9	1	0	18	0	-0.127	-1.48	4.47405	0.908	2	1
370	6.745	180	CCNc1cc(ccc1C(N)=O)-n1nc(C(C)C)c2c(ccnc12)-n1cnc(c1)-c1cnn(C)c1	0	18	18	5	11	0.9333	8	1	1	18	0	-0.1147	-0.7978	5.92374	2.223	4	1
371	6.721	190	CC(C)Nc1cc(ccc1C(N)=O)-n1nc(C(C)C)c2c(ccnc12)-n1cnc(c1)-c1cnn(C)c1	0	18	18	7	11	0.9335	10	1	1	18	0	-0.1147	-1.0983	6.31224	2.683	4	1
372	6.602	250	CC(C)c1nn(-c2ccc(C(N)=O)c(NC(C)(C)C)c2)c2nccc(-n3cnc(c3)-c3cnn(C)c3)c12	0	18	18	5	12	0.9337	9	1	1	18	0	-0.1147	0.6932	6.10225	3.216	5	1
373	6.585	260	CC(C)c1nn(-c2ccc(C(N)=O)c(NCC(F)F)c2)c2nccc(-n3cnc(c3)-c3cnn(C)c3)c12	0	18	18	5	13	0.9334	9	1	1	18	0	-0.1147	-0.5351	5.56885	2.709	4	1
374	6.31	490	CC(C)c1nn(-c2ccc(C(N)=O)c(NCC(F)(F)F)c2)c2nccc(-n3cnc(c3)-c3cnn(C)c3)c12	0	18	18	6	13	0.9335	9	1	1	18	0	-0.1147	-0.0408	5.86605	3.225	4	1
375	6.796	160	CC(C)c1nn(-c2ccc(C(N)=O)c(NCCN3CCCC3)c2)c2nccc(-n3cnc(c3)-c3cnn(C)c3)c12	0	22	18	6	13	0.9333	9	1	0	18	0	-0.1147	-0.8568	5.39955	2.275	6	1
376	6.678	210	CC(C)c1nn(-c2cnc(cc2C)C(N)=O)c2nccc(-n3cnc(c3)-c3cnn(C)c3)c12	0	17	17	4	12	1.0334	8	1	0	17	0	-0.0665	-0.725	4.37681	1.571	3	1
377	6.699	200	CC(C)Nc1cc(ccc1-n1nc(C(C)C)c2c(ccnc12)-n1cnc(c1)-c1cnn(C)c1)C(N)=O	0	18	18	6	11	0.9459	8	1	2	18	0	-0.1268	-1.0983	6.31224	2.254	4	1
378	6.745	180	CCNc1cc(ccc1-n1nc(C(C)C)c2c(ccnc12)-n1cnc(c1)-c1cnn(C)c1)C(N)=O	0	18	18	6	12	0.9457	8	1	1	18	0	-0.1268	-0.7978	5.92374	1.794	4	1
379	6.745	180	CCCNc1cc(ccc1-n1nc(C(C)C)c2c(ccnc12)-n1cnc(c1)-c1cnn(C)c1)C(N)=O	0	18	18	6	12	0.9457	9	1	1	18	0	-0.1268	-0.5655	6.31384	2.268	4	1
380	6.721	190	CC(C)c1nn(-c2ccc(cc2NCC(F)F)C(N)=O)c2nccc(-n3cnc(c3)-c3cnn(C)c3)c12	0	18	18	6	11	0.9458	10	1	1	18	0	-0.1268	-0.5351	5.56885	2.28	4	1
381	6.456	350	CC(C)c1nn(-c2ccc(cc2C#N)C(N)=O)c2nccc(-n3cnc(c3)-c3cnn(C)c3)c12	0	18	18	4	12	0.9659	9	2	0	18	0	-0.1309	-0.4442	4.76353	1.041	2	1
382	6.638	230	CC(C)c1nn(-c2ccc(cc2CN(C)C)C(N)=O)c2nccc(-n3cnc(c3)-c3cnn(C)c3)c12	0	18	18	5	12	0.874	10	2	2	18	0	-0.1521	0.3094	4.66866	1.669	3	1
383	6.638	230	CC(C)c1nn(-c2ccc(cc2CN2CCOCC2)C(N)=O)c2nccc(-n3cnc(c3)-c3cnn(C)c3)c12	0	22	18	5	14	0.874	11	2	0	18	0	-0.1521	-0.0029	4.43926	1.269	7	1
384	7.046	90	COc1cc(ccc1-n1nc(C(C)C)c2c(ccnc12)-n1cnc(c1)-c1cnn(C)c1)C(N)=O	0	18	18	6	12	1.0606	9	1	0	18	0	-0.1039	-0.7819	5.40124	1.64	2	1
385	6.538	290	CC(C)c1nn(-c2ccc(C(N)=O)c(C)c2C)c2nccc(-n3cnc(c3)-c3cnn(C)c3)c12	0	18	18	4	12	0.8757	9	1	0	18	0	-0.1563	0.6095	5.05731	1.973	4	1
386	6.161	690	CC(C)c1nn(-c2ccc(C(N)=O)c(F)c2C)c2nccc(-n3cnc(c3)-c3cnn(C)c3)c12	0	18	18	4	12	1.0617	9	1	0	18	0	-0.0987	0.0729	5.11368	1.697	3	1
387	6.155	700	CCc1c(F)c(ccc1-n1nc(C(C)C)c2c(ccnc12)-n1cnc(c1)-c1cnn(C)c1)C(N)=O	0	18	18	4	12	1.0649	9	1	0	18	0	-0.0987	0.8666	5.59335	2.767	3	1
388	6.921	120	CCNc1c(C)c(ccc1C(N)=O)-n1nc(C(C)C)c2c(ccnc12)-n1cnc(c1)-c1cnn(C)c1	0	18	18	5	11	0.9393	9	1	1	18	0	-0.1032	-0.3514	6.00647	2.404	5	1
389	6.796	160	CCNc1c(CC)c(ccc1C(N)=O)-n1nc(C(C)C)c2c(ccnc12)-n1cnc(c1)-c1cnn(C)c1	0	18	18	5	11	0.9399	10	1	1	18	0	-0.1004	-0.6865	6.48614	2.868	5	1
390	6.699	200	CCc1c(N)c(ccc1-n1nc(C(C)C)c2c(ccnc12)-n1cnc(c1)-c1cnn(C)c1)C(N)=O	0	18	18	6	11	0.9371	8	1	0	18	0	-0.1006	-1.3687	6.14474	1.982	3	1
391	6.398	400	CC(C)c1nn(-c2ccc(cc2C)C(N)=O)c2nccc(-n3cnc(c3)-c3cccnc3)c12	0	20	20	4	12	0.823	9	1	0	20	0	-0.2633	-0.2813	4.50004	1.384	3	1
392	6.886	130	CCc1cc(ccc1-n1nc(C(C)C)c2c(ccnc12)-n1cnc(c1)-c1cccnc1)C(N)=O	0	20	20	6	12	0.8233	9	1	0	20	0	-0.2602	-0.6164	4.97971	1.848	3	1
393	6.553	280	CC(C)c1nn(-c2ccc(cc2C(C)C)C(N)=O)c2nccc(-n3cnc(c3)-c3cccnc3)c12	0	20	20	4	12	0.8236	9	1	0	20	0	-0.2571	-0.3504	5.54071	2.352	4	1
394	6.721	190	CC(C)c1nn(-c2ccc(cc2C2CC2)C(N)=O)c2nccc(-n3cnc(c3)-c3cccnc3)c12	0	23	20	4	15	0.8236	9	1	0	20	0	-0.2566	-0.7182	5.29471	2.012	2	1
395	6.244	570	CCNc1cc(ccc1C(N)=O)-n1nc(C(C)C)c2c(ccnc12)-n1cnc(c1)-c1cccnc1	0	20	20	5	11	0.8838	8	1	1	20	0	-0.2073	-1.2422	5.4492	2.026	4	1
396	6.119	760	CC(C)Nc1cc(ccc1C(N)=O)-n1nc(C(C)C)c2c(ccnc12)-n1cnc(c1)-c1cccnc1	0	20	20	6	11	0.884	9	1	1	20	0	-0.2073	-1.5427	5.8377	2.486	4	1
397	6.387	410	CC(C)c1nn(-c2ccc(C(N)=O)c(NC(C)(C)C)c2)c2nccc(-n3cnc(c3)-c3cccnc3)c12	0	20	20	5	12	0.8842	9	1	1	20	0	-0.2073	-0.5613	5.62771	2.903	5	1
398	6.921	120	COc1cc(ccc1-n1nc(C(C)C)c2c(ccnc12)-n1cnc(c1)-c1cccnc1)C(N)=O	0	20	20	6	12	1.0111	9	1	0	20	0	-0.1965	-1.2263	4.9267	1.443	2	1
399	6.77	170	CC(C)Nc1cc(ccc1C(N)=O)-n1nc(C(C)C)c2c(ccnc12)-n1cnc(c1)-c1cn[nH]c1	0	18	18	5	13	0.9301	9	1	1	18	0	-0.1147	-1.6342	5.41475	2.878	4	1
400	6.377	420	CCNc1cc(ccc1C(N)=O)-n1nc(C(C)C)c2c(ccnc12)-n1cnc(c1)-c1cn[nH]c1	0	18	18	7	11	0.9299	10	1	1	18	0	-0.1147	-1.3337	5.02625	2.418	4	1
401	6.201	630	CCn1cc(cn1)-c1cn(cn1)-c1ccnc2n(nc(C(C)C)c12)-c1ccc(cc1Cl)C(N)=O	0	18	18	7	12	0.9565	9	1	0	18	0	-0.1296	0.3358	6.02815	2.4	4	1
402	6.114	770	CCNc1cc(ccc1C(N)=O)-n1nc(C(C)C)c2c(ccnc12)-n1cnc(c1)-c1cnn(CC)c1	0	18	18	6	12	0.9336	8	1	1	18	0	-0.1147	-0.5474	6.40664	2.646	6	1
403	6.092	810	CCNc1cc(ccc1C(N)=O)-n1nc(C(C)C)c2c(ccnc12)-n1cnc(c1)-c1cnn(c1)C(F)F	0	18	18	4	12	0.9397	9	1	1	18	0	-0.1147	0.0241	6.49545	2.937	4	1
404	6.398	400	CC(C)c1nn(-c2ccc(C(N)=O)c(c2)C(C)C)c2nccc(-n3cnc(c3)-c3cnn(CCO)c3)c12	0	18	18	4	12	0.8734	9	1	2	18	0	-0.1645	0.1135	5.47055	2.818	6	1
405	6.409	390	CC(C)c1nn(-c2ccc(cc2C)C(N)=O)c2nccc(-n3cnc(c3)-c3ccncc3)c12	0	20	20	4	12	0.7984	8	1	0	20	0	-0.2395	-0.2813	4.49746	1.384	3	1
406	6.032	930	CC(C)NC(=O)c1ccc(cc1)-c1cn(cn1)-c1ccnc2n(nc(C(C)C)c12)-c1ccc(cc1Cl)C(N)=O	0	21	21	7	10	0.8595	9	2	0	21	0	-0.3312	0.6825	6.89524	2.402	4	2
407	6.18	660	CC(C)c1nn(-c2ccc(cc2Cl)C(N)=O)c2nccc(-n3cnc(c3)-c3ccc(cc3)C(=O)N(C)C)c12	0	21	21	5	13	0.8597	7	2	0	21	0	-0.3312	0.8349	6.05365	1.661	2	2
408	5.996	1010	CC(C)c1nn(-c2ccc(cc2Cl)C(N)=O)c2nccc(-n3cnc(c3)-c3ccc(cc3)C(N)=O)c12	0	21	21	7	11	0.8593	8	2	0	21	0	-0.3312	0.6303	5.45075	1.001	2	2
409	6.886	130	Cn1cc(cn1)-c1cn(cn1)-c1ccnc2n(nc(c12)C(F)(F)F)-c1ccc(cc1Cl)C(N)=O	0	18	18	6	12	1.0648	8	1	0	18	0	-0.1296	0.4492	5.15426	2.13	1	1
410	6.854	140	Cc1cc(ccc1-n1nc(c2c(ccnc12)-n1cnc(c1)-c1cnn(C)c1)C(F)(F)F)C(N)=O	0	18	18	6	12	0.9812	9	1	0	18	0	-0.1707	0.5269	4.52888	1.734	2	1
411	6.959	110	CCc1cc(ccc1-n1nc(c2c(ccnc12)-n1cnc(c1)-c1cnn(C)c1)C(F)(F)F)C(N)=O	0	18	18	6	12	0.9815	9	1	0	18	0	-0.1676	0.1918	5.06326	2.198	2	1
412	7.155	70	CCCc1cc(ccc1-n1nc(c2c(ccnc12)-n1cnc(c1)-c1cnn(C)c1)C(F)(F)F)C(N)=O	0	18	18	6	12	0.9815	9	1	1	18	0	-0.1673	-0.2894	5.45336	2.767	2	1
413	6.886	130	Cn1cc(cn1)-c1cn(cn1)-c1ccnc2n(nc(c12)C(F)(F)F)-c1ccc(C(N)=O)c(N)c1	0	18	18	6	12	1.0392	9	1	0	18	0	-0.115	-1.1162	4.08306	1.49	1	1
414	7	100	Cn1cc(cn1)-c1cn(cn1)-c1ccnc2n(nc(c12)C(F)(F)F)-c1ccc(cc1N)C(N)=O	0	18	18	6	12	1.0516	9	1	0	18	0	-0.127	-1.1162	4.08306	1.061	1	1
415	6.678	210	CN(C)c1cc(ccc1-n1nc(c2c(ccnc12)-n1cnc(c1)-c1cnn(C)c1)C(F)(F)F)C(N)=O	0	18	18	6	12	1.0567	9	1	0	18	0	-0.1266	-0.1485	5.09395	2.087	1	1
416	6.796	160	CC(C)Nc1cc(ccc1C(N)=O)-n1nc(c2c(ccnc12)-n1cnc(c1)-c1cnn(C)c1)C(F)(F)F	0	18	18	5	11	1.0422	10	1	1	18	0	-0.1147	-0.7345	5.92125	2.836	3	1
417	6.77	170	CCNc1cc(ccc1C(N)=O)-n1nc(c2c(ccnc12)-n1cnc(c1)-c1cnn(C)c1)C(F)(F)F	0	18	18	6	11	1.042	9	1	1	18	0	-0.1147	-0.434	5.53275	2.376	3	1
418	6.959	110	CCNc1cc(ccc1-n1nc(c2c(ccnc12)-n1cnc(c1)-c1cnn(C)c1)C(F)(F)F)C(N)=O	0	18	18	6	12	1.0544	9	1	1	18	0	-0.1268	-0.434	5.53275	1.947	3	1
419	7	100	CCCNc1cc(ccc1-n1nc(c2c(ccnc12)-n1cnc(c1)-c1cnn(C)c1)C(F)(F)F)C(N)=O	0	18	18	6	12	1.0544	9	1	1	18	0	-0.1268	-1.0118	5.92285	2.305	3	1
420	6.959	110	CC(C)Nc1cc(ccc1-n1nc(c2c(ccnc12)-n1cnc(c1)-c1cnn(C)c1)C(F)(F)F)C(N)=O	0	18	18	6	11	1.0546	8	1	2	18	0	-0.1268	-0.7345	5.92125	2.407	3	1
421	6.921	120	Cn1cc(cn1)-c1cn(cn1)-c1ccnc2n(nc(c12)C(F)(F)F)-c1ccc(cc1NC1CCC1)C(N)=O	0	22	18	4	11	1.0546	8	1	2	18	0	-0.1268	-1.7011	5.46526	2.425	1	1
422	6.854	140	Cn1cc(cn1)-c1cn(cn1)-c1ccnc2n(nc(c12)C(F)(F)F)-c1ccc(cc1NC1CCCC1)C(N)=O	0	23	18	4	11	1.0546	9	1	2	18	0	-0.1268	-1.9891	5.85536	2.783	1	1
423	7	100	Cn1cc(cn1)-c1cn(cn1)-c1ccnc2n(nc(c12)C(F)(F)F)-c1ccc(cc1NCC(F)F)C(N)=O	0	18	18	4	11	1.0545	9	1	1	18	0	-0.1268	-0.1713	5.17786	2.433	3	1
424	7.155	70	COCCNc1cc(ccc1-n1nc(c2c(ccnc12)-n1cnc(c1)-c1cnn(C)c1)C(F)(F)F)C(N)=O	0	18	18	6	11	1.0544	8	1	1	18	0	-0.1268	-0.8153	5.15925	1.334	3	1
425	6.638	230	Cn1cc(cn1)-c1cn(cn1)-c1ccnc2n(nc(c12)C(F)(F)F)-c1ccc(cc1C#N)C(N)=O	0	18	18	6	12	1.0745	8	2	0	18	0	-0.1309	-0.0804	4.37254	1.194	1	1
426	6.678	210	Cn1cc(cn1)-c1cn(cn1)-c1ccnc2n(nc(c12)C(F)(F)F)-c1ccc(cc1Br)C(N)=O	0	18	18	4	11	1.0371	8	1	0	18	0	-0.1345	0.5332	5.26336	2.306	1	1
427	7	100	Cn1cc(cn1)-c1cn(cn1)-c1ccnc2n(nc(c12)C(F)(F)F)-c1ccc(cc1F)C(N)=O	0	18	18	6	12	1.1653	9	1	0	18	0	-0.1113	-0.0097	4.63996	1.669	1	1
428	5.971	1070	Cn1cc(cn1)-c1cn(cn1)-c1ccnc2n(nc(c12)C(F)(F)F)-c1ccc(cc1-c1ccccc1)C(N)=O	0	24	24	4	14	0.9946	9	1	0	23	0	-0.4492	1.0927	6.21626	3.178	1	1
429	6.495	320	CC(=C)c1cc(ccc1-n1nc(c2c(ccnc12)-n1cnc(c1)-c1cnn(C)c1)C(F)(F)F)C(N)=O	0	18	18	6	12	0.9895	9	1	0	18	0	-0.1416	1.0388	5.35125	2.589	2	1
430	6.432	370	Cc1cc(ccc1-n1nc(c2c(ccnc12)-n1cnc(c1)-c1cccnc1)C(F)(F)F)C(N)=O	0	20	20	6	12	0.9317	9	1	0	20	0	-0.2633	0.0825	4.05434	1.537	2	1
431	6.377	420	NC(=O)c1ccc(cc1N)-n1nc(c2c(ccnc12)-n1cnc(c1)-c1cccnc1)C(F)(F)F	0	20	20	6	12	0.9897	9	1	0	20	0	-0.2076	-1.5606	3.60852	1.293	1	1
432	6.569	270	NC(=O)c1ccc(c(N)c1)-n1nc(c2c(ccnc12)-n1cnc(c1)-c1cccnc1)C(F)(F)F	0	20	20	6	12	1.0021	9	1	0	20	0	-0.2196	-1.5606	3.60852	0.864	1	1
433	6.276	530	CCNc1cc(ccc1C(N)=O)-n1nc(c2c(ccnc12)-n1cnc(c1)-c1cccnc1)C(F)(F)F	0	20	20	4	11	0.9925	8	1	1	20	0	-0.2073	-0.8784	5.05821	2.179	3	1
434	6.42	380	CC(C)Nc1cc(ccc1C(N)=O)-n1nc(c2c(ccnc12)-n1cnc(c1)-c1cccnc1)C(F)(F)F	0	20	20	5	11	0.9927	10	1	1	20	0	-0.2073	-1.1789	5.44671	2.639	3	1
435	6.721	190	CCNc1cc(ccc1-n1nc(c2c(ccnc12)-n1cnc(c1)-c1cccnc1)C(F)(F)F)C(N)=O	0	20	20	6	11	1.0049	8	1	1	20	0	-0.2194	-0.8784	5.05821	1.75	3	1
436	6.854	140	CC(C)Nc1cc(ccc1-n1nc(c2c(ccnc12)-n1cnc(c1)-c1cccnc1)C(F)(F)F)C(N)=O	0	20	20	6	11	1.0051	8	1	2	20	0	-0.2194	-1.1789	5.44671	2.21	3	1
437	6.699	200	NC(=O)c1ccc(c(NC2CCC2)c1)-n1nc(c2c(ccnc12)-n1cnc(c1)-c1cccnc1)C(F)(F)F	0	24	20	6	16	1.0051	11	1	2	20	0	-0.2194	-2.1455	4.99072	2.228	1	1
438	6.481	330	NC(=O)c1ccc(c(NC2CCCC2)c1)-n1nc(c2c(ccnc12)-n1cnc(c1)-c1cccnc1)C(F)(F)F	0	25	20	8	17	1.0051	12	1	2	20	0	-0.2194	-2.4335	5.38082	2.586	1	1
439	6.638	230	CCn1cc(cn1)-c1cn(cn1)-c1ccnc2n(nc(c12)C(F)(F)F)-c1ccc(cc1N)C(N)=O	0	18	18	7	11	1.0519	8	1	0	18	0	-0.127	-0.8658	4.56596	1.484	3	1
440	6.721	190	CCNc1cc(ccc1-n1nc(c2c(ccnc12)-n1cnc(c1)-c1cnn(CC)c1)C(F)(F)F)C(N)=O	0	18	18	6	12	1.0547	9	1	1	18	0	-0.1268	-0.1836	6.01565	2.37	5	1
441	6.097	800	CC(C)n1cc(cn1)-c1cn(cn1)-c1ccnc2n(nc(c12)C(F)(F)F)-c1ccc(cc1N)C(N)=O	0	18	18	7	10	1.0522	8	1	0	18	0	-0.127	-1.1663	5.12696	1.944	3	1
442	6.208	620	CCNc1cc(ccc1-n1nc(c2c(ccnc12)-n1cnc(c1)-c1cnn(c1)C(C)C)C(F)(F)F)C(N)=O	0	18	18	5	12	1.055	8	1	1	18	0	-0.1268	-0.4841	6.57665	2.83	5	1
443	7	100	COCCC(=O)n1ccc2cc(ccc12)-n1c(O)nnc1-c1cc(C(C)C)c(O)cc1O	0	16	16	8	14	0.96	13	0	2	16	0	-0.1783	0.0399	4.68888	3.183	3	0
444	6.721	190	CCNc1cc(ccc1C(N)=O)-c1nccc2c(cccc12)-n1cnc(c1)-c1cnn(C)c1	0	21	21	8	14	0.6453	12	1	0	21	0	-0.3119	-1.6335	4.8759	1.788	2	1
445	7.222	60	NC(=O)c1ccc(cc1NC1CCC(O)CC1)-c1nccc2c(cccc12)-c1cncc(N)c1	0	26	20	7	22	0.3461	16	1	0	20	0	-0.3765	-3.343	2.13038	1.55	0	1
446	6.721	190	CCNc1cc(ccc1C(N)=O)-c1cc(nc2c(cccc12)-n1cnc(c1)-c1cnn(C)c1)C(F)(F)F	0	21	21	8	14	0.7842	12	1	0	18	0	-0.3249	0.0939	5.21081	3.248	3	1
447	6.469	340	Cn1cc(cn1)-c1cn(cn1)-c1cccc2c(nc(nc12)C(F)(F)F)-c1ccc(C(N)=O)c(N)c1	0	20	20	7	13	0.9787	9	1	0	20	0	-0.2752	-1.3371	4.17318	1.259	1	1
448	5.842	1440	CC(C)(C)Nc1cc(ccc1C(N)=O)-c1cc(nc2c(cccc12)-c1cnc2ccccc2c1)C(F)(F)F	0	24	24	6	16	0.4515	10	1	0	21	0	-0.5949	3.1031	6.72501	4.513	4	1
449	6.77	170	NC(=O)c1ccc(cc1NC1CCC(O)CC1)-c1nccc2c(cccc12)-c1cnc2ccccc2c1	0	30	24	11	21	0.3259	15	1	0	24	0	-0.5985	-0.777	4.26402	2.957	0	1
450	6.824	150	Cc1cc2c(cccc2c(n1)-c1ccc(C(N)=O)c(NC2CCC(O)CC2)c1)-c1cnc2ccccc2c1	0	30	24	8	17	0.3368	14	1	0	24	0	-0.5953	-3.1696	3.76197	6.557	1	1
451	7	100	Cc1cc2c(cccc2c(-c2ccc(C(N)=O)c(NC3CCC(O)CC3)c2)[n+]1[O-])-c1cnc2ccccc2c1	0	30	24	8	15	0.7574	13	1	0	24	0	-0.5432	-3.1963	3.86357	5.908	1	1
452	6.569	270	Cc1ccc2ncc(cc2c1)-c1cccc2c(nccc12)-c1ccc(C(N)=O)c(NC2CCC(O)CC2)c1	0	30	24	8	16	0.3261	11	1	1	24	0	-0.5812	-2.9671	3.39989	6.383	1	1
453	6.319	480	Cc1ccc2cc(cnc2c1)-c1cccc2c(nccc12)-c1ccc(C(N)=O)c(NC2CCC(O)CC2)c1	0	30	24	9	16	0.3261	11	1	0	24	0	-0.5812	-2.9671	3.39989	6.383	1	1
454	7.155	70	NC(=O)c1ccc(cc1NC1CCC(O)CC1)-c1nccc2c(cccc12)-c1cnc2nc[nH]c2c1	0	27	21	8	19	0.6167	14	1	0	21	0	-0.3716	-3.6091	3.22362	3.941	0	1
455	6.347	450	NC(=O)c1ccc(cc1NC1CCC(O)CC1)-c1nccc2c(cccc12)-c1cnc2nccnc2c1	0	28	22	8	18	0.6388	13	1	0	22	0	-0.3696	-1.0491	5.03618	1.19	0	1
456	5.824	1500	NC(=O)c1ccc(cc1NC1CCC(O)CC1)-c1nccc2c(cccc12)-c1cnc2[nH]ccc2c1	0	28	22	7	18	0.417	13	1	0	22	0	-0.4231	-2.1892	4.60522	1.749	0	1
457	6.854	140	NC(=O)c1ccc(cc1NC1CCC(O)CC1)-c1nccc2c(cccc12)-c1cccnc1	0	26	20	7	19	0.2802	14	1	0	20	0	-0.4402	-2.253	2.84398	2.042	0	1
458	7	100	NC(=O)c1ccc(cc1NC1CCC(O)CC1)-c1nccc2c(cccc12)-c1cncc(CO)c1	0	26	20	7	19	0.2858	15	1	0	20	0	-0.3954	-2.7906	2.20648	1.615	1	1
459	6.187	650	COc1cncc(c1)-c1cccc2c(nccc12)-c1ccc(C(N)=O)c(NC2CCC(O)CC2)c1	0	26	20	7	15	0.4642	12	1	0	20	0	-0.3553	-3.2389	4.21449	1.876	0	1
460	6.886	130	NC(=O)c1ccc(cc1NC1CCC(O)CC1)-c1nccc2c(cccc12)-n1cnc(c1)-c1ccncc1	0	29	23	8	15	0.5714	11	1	0	23	0	-0.3807	-3.5497	3.0513	2.161	0	1
461	6.824	150	CC(=O)Nc1cncc(c1)-c1cccc2c(nccc12)-c1ccc(C(N)=O)c(NC2CCC(O)CC2)c1	0	26	20	9	15	0.3555	10	1	1	20	0	-0.3759	-4.234	1.76647	3.678	1	2
462	6.638	230	NC(=O)c1ccc(cc1NC1CCC(O)CC1)-c1nccc2c(cccc12)-c1cncc(NC(=O)CO)c1	0	26	20	7	17	0.3556	11	1	1	20	1	-0.3759	-4.906	0.73887	2.641	1	2
463	7.097	80	NC(=O)c1ccc(cc1NC1CCC(O)CC1)-c1nccc2c(cccc12)-n1cnc(c1)-c1cccnc1	0	29	23	9	19	0.596	13	1	0	23	0	-0.4045	-3.5497	3.05388	2.161	0	1
464	6.347	450	NCC(=O)OC1CCC(CC1)Nc1cc(ccc1C(N)=O)-c1nccc2c(cccc12)-c1cnc2ccccc2c1	0	30	24	7	14	0.3259	12	1	0	24	0	-0.5985	-4.1916	3.48156	5.696	1	1
465	6.854	140	CNc1cncc(c1)-c1cccc2c(nccc12)-c1ccc(C(N)=O)c(NC2CCC(O)CC2)c1	0	26	20	7	15	0.3486	12	1	0	20	0	-0.3763	-3.5052	3.78749	1.607	0	1
466	5.827	1490	CCCNc1cncc(c1)-c1cccc2c(nccc12)-c1ccc(C(N)=O)c(NC2CCC(O)CC2)c1	0	26	20	9	15	0.3489	11	1	1	20	0	-0.3763	-4.2546	2.62997	4.573	2	1
467	6.886	130	NC(=O)c1ccc(cc1NC1CCC(O)CC1)-c1nccc2c(cccc12)-c1cnc2cc[nH]c2c1	0	28	22	8	19	0.4137	13	1	0	22	0	-0.3915	-3.0314	4.14121	2.438	0	1
468	6.824	150	Cc1nc2ncc(cc2[nH]1)-c1cccc2c(nccc12)-c1ccc(C(N)=O)c(NC2CCC(O)CC2)c1	0	27	21	9	15	0.6278	13	1	0	21	0	-0.3716	-2.4335	4.67085	1.534	1	1
469	6.409	390	CCc1nc2ncc(cc2[nH]1)-c1cccc2c(nccc12)-c1ccc(C(N)=O)c(NC2CCC(O)CC2)c1	0	27	21	9	16	0.6307	12	1	0	21	0	-0.3716	-2.3573	4.74533	1.787	1	1
470	6.161	690	NC(=O)c1ccc(cc1NC1CCC(O)CC1)-c1nccc2c(cccc12)-c1cncnc1	0	25	19	7	19	0.4283	14	1	0	19	0	-0.3445	-3.1596	2.56464	0.744	0	1
471	6.658	220	NC(=O)c1ccc(cc1NC1CCC(O)CC1)-c1nccc2c(cccc12)-c1cnc2cc(C=O)ccc2c1	0	30	24	8	18	0.3428	12	1	0	24	0	-0.5178	-1.759	5.10751	1.954	0	1
472	7.155	70	Cn1cc(cn1)-c1cn(cn1)-c1cccc2c(nccc12)-c1ccc(C(N)=O)c(NC2CCC(O)CC2)c1	0	27	21	8	15	0.6455	12	1	0	21	0	-0.3119	-3.06	3.37762	2.97	0	1
473	6.553	280	CC(C)Cn1cc(cn1)-c1cn(cn1)-c1cccc2c(nccc12)-c1ccc(C(N)=O)c(NC2CCC(O)CC2)c1	0	27	21	7	14	0.6458	11	1	0	21	0	-0.3119	-2.5778	4.49662	4.048	3	1
474	6.921	120	CC(C)n1cc(cn1)-c1cn(cn1)-c1cccc2c(nccc12)-c1ccc(C(N)=O)c(NC2CCC(O)CC2)c1	0	27	21	10	15	0.6461	12	1	0	21	0	-0.3119	-3.7494	5.38083	2.835	2	1
475	6.328	470	NC(=O)c1ccc(cc1NC1CCC(O)CC1)-c1nccc2c(cccc12)-n1cnc(Br)c1	0	24	18	9	15	0.5525	11	1	0	18	0	-0.3119	-2.4811	4.06263	2.317	0	1
476	6.432	370	CNC(=O)c1ccc(cn1)-c1cccc2c(nccc12)-c1ccc(C(N)=O)c(NC2CCC(O)CC2)c1	0	26	20	9	16	0.3787	12	2	0	20	0	-0.4271	-4.1416	1.41887	3.847	0	2
477	6.602	250	CNc1cc(ccc1C(N)=O)-c1nccc2c(cccc12)-n1cnc(c1)-c1cnn(C)c1	0	21	21	9	14	0.645	12	1	0	21	0	-0.3119	-1.8839	4.4858	1.365	0	1
478	7	100	Cn1cc(cn1)-c1cn(cn1)-c1cccc2c(nccc12)-c1ccc(C(N)=O)c(NCC2CCCO2)c1	0	25	21	8	16	0.6453	12	1	0	21	0	-0.3119	-2.7435	4.21243	1.718	2	1
479	6.77	170	Cn1cc(cn1)-c1cn(cn1)-c1cccc2c(nccc12)-c1ccc(C(N)=O)c(NCCc2ccccn2)c1	0	26	26	9	15	0.716	11	1	0	26	0	-0.4544	-2.4275	4.91488	1.566	1	1
480	6.721	190	CC(C)Nc1cc(ccc1C(N)=O)-c1nccc2c(cccc12)-n1cnc(c1)-c1cnn(C)c1	0	21	21	10	15	0.6455	11	1	0	21	0	-0.3119	-1.34	4.23341	2.654	2	1
481	6.678	210	COCCNc1cc(ccc1C(N)=O)-c1nccc2c(cccc12)-n1cnc(c1)-c1cnn(C)c1	0	21	21	8	15	0.6453	12	1	0	21	0	-0.3119	-1.4208	3.47141	1.581	2	1
482	6.569	270	Cn1cc(cn1)-c1cn(cn1)-c1cccc2c(nccc12)-c1ccc(C(N)=O)c(NC2CCCCCC2)c1	0	28	21	7	15	0.6455	13	1	0	21	0	-0.3119	-3.7646	5.75623	3.762	0	1
483	6.77	170	CC(C)Nc1cc(ccc1C(N)=O)-c1cc(nc2c(cccc12)-n1cnc(c1)-c1cnn(C)c1)C(F)(F)F	0	21	21	8	15	0.7844	12	1	0	18	0	-0.3249	-0.2066	5.59931	3.708	3	1
484	6.658	220	Cn1cc(cn1)-c1cn(cn1)-c1cccc2c(cc(nc12)C(F)(F)F)-c1ccc(C(N)=O)c(NCC2CC2)c1	0	24	21	9	16	0.7842	12	1	0	18	0	-0.3249	-0.1488	5.51912	3.6	2	1
485	6.824	150	CCNc1cc(ccc1C(N)=O)-c1nc(C)cc2c(cccc12)-n1cnc(c1)-c1cnn(C)c1	0	21	21	9	14	0.6565	12	1	0	21	0	-0.3089	-0.5647	5.266	2.338	3	1
486	6.678	210	CC(C)Nc1cc(ccc1C(N)=O)-c1nc(C)cc2c(cccc12)-n1cnc(c1)-c1cnn(C)c1	0	21	21	10	15	0.6567	11	1	0	21	0	-0.3089	-0.8652	5.6545	2.798	3	1
487	6.721	190	Cc1cc2c(cccc2c(n1)-c1ccc(C(N)=O)c(NCC2CC2)c1)-n1cnc(c1)-c1cnn(C)c1	0	24	21	9	15	0.6565	12	1	0	21	0	-0.3089	-1.237	4.0276	2.69	2	1
488	6.824	150	Cn1cc(cn1)-c1cn(cn1)-c1cccc2c(cc(nc12)C(F)(F)F)-c1ccc(C(N)=O)c(N)c1	0	21	21	9	14	0.7815	11	1	0	18	0	-0.3251	-0.695	4.27942	2.399	1	1
489	6.678	210	Cn1cc(cn1)-c1cn(cn1)-c1cccc2c(cc(nc12)C(F)(F)F)-c1ccc(C(N)=O)c(F)c1	0	21	21	9	14	0.8946	11	1	0	18	0	-0.3084	0.4115	4.83632	2.578	1	1
490	6.77	170	Cc1cc2c(cccc2c(n1)-c1ccc(C(N)=O)c(N)c1)-n1cnc(c1)-c1cnn(C)c1	0	21	21	9	14	0.6537	11	1	0	21	0	-0.3091	-1.2469	3.81631	1.452	1	1
491	6.131	740	CCNc1cc(ccc1C(N)=O)-c1nccc2c(ccnc12)-n1cnc(c1)-c1cnn(C)c1	0	20	20	7	14	0.8052	11	1	0	20	0	-0.1813	-2.0343	4.25578	2.184	2	1
492	6.721	190	Cn1cc(cn1)-c1cn(cn1)-c1cccc2c(cc(nc12)C(F)(F)F)-c1ccc(cc1N)C(N)=O	0	21	21	9	15	0.762	11	1	0	18	0	-0.3037	-0.695	4.27942	1.759	1	1
493	6.357	440	Cc1cc2c(cccc2c(n1)-c1ccc(cc1N)C(N)=O)-n1cnc(c1)-c1cnn(C)c1	0	21	21	9	15	0.6528	12	1	0	21	0	-0.3064	-1.7832	2.7879	1.06	1	1
494	6.678	210	Cn1cc(cn1)-c1cn(cn1)-c1cccc2c(nc(nc12)C(F)(F)F)-c1ccc(cc1N)C(N)=O	0	20	20	6	13	0.9778	9	1	0	20	0	-0.2725	-1.3371	4.17318	0.83	1	1
495	6.699	200	CC(C)(C)Nc1cc(ccc1C(N)=O)-c1cc(nc2c(cccc12)-n1cnc(c1)-c1cccnc1)C(F)(F)F	0	23	23	8	16	0.7352	12	1	0	20	0	-0.4175	0.3304	5.51487	3.928	4	1
496	6.77	170	CCNc1cc(ccc1C(N)=O)-c1cc(nc2c(cccc12)-n1cnc(c1)-c1cccnc1)C(F)(F)F	0	23	23	7	14	0.7348	12	1	0	20	0	-0.4175	-0.3505	4.73627	3.051	3	1
497	6.745	180	NC(=O)c1ccc(cc1N)-c1cc(nc2c(cccc12)-n1cnc(c1)-c1cccnc1)C(F)(F)F	0	23	23	9	14	0.7321	11	1	0	20	0	-0.4177	-1.0327	3.28658	2.165	1	1
498	6.495	320	Cn1cc(cn1)-c1cn(cn1)-c1cccc2c(nc(nc12)C(F)(F)F)-c1ccc(C(N)=O)c(NC(C)(C)C)c1	0	20	20	6	12	0.9819	10	1	0	20	0	-0.275	0.026	5.80138	3.022	4	1
499	6.854	140	CCNc1cc(ccc1C(N)=O)-c1nc(nc2c(cccc12)-n1cnc(c1)-c1cnn(C)c1)C(F)(F)F	0	20	20	5	12	0.9815	10	1	0	20	0	-0.275	-0.6549	6.43325	2.145	3	1
500	6.06	870	Cn1cc(cn1)-c1cn(cn1)-c1cccc2c(cc(nc12)C(F)(F)F)-c1ccc(C(N)=O)c(Cl)c1	0	21	21	8	14	0.7954	11	1	0	18	0	-0.3282	0.8704	5.35062	3.039	1	1
501	6.678	210	Cn1cc(cn1)-c1cn(cn1)-c1cccc2c(cc(nc12)C(F)(F)F)-c1ccc(nc1)C(N)=O	0	20	20	9	15	0.8493	12	1	0	20	0	-0.2562	-1.1938	4.00629	1.835	1	1
502	6.658	220	Cc1cc(ccc1-c1cc(nc2c(cccc12)-n1cnc(c1)-c1cnn(C)c1)C(F)(F)F)C(N)=O	0	21	21	9	15	0.7239	12	1	0	18	0	-0.3808	1.0548	4.26165	3.239	2	1
503	6.509	310	Cc1cc(ccc1-c1nc(nc2c(cccc12)-n1cnc(c1)-c1cnn(C)c1)C(F)(F)F)C(N)=O	0	20	20	7	13	0.9224	9	1	0	20	0	-0.3324	0.306	5.42938	1.714	2	1
504	7	100	Cn1cc(cn1)-c1cn(cn1)-c1cccc2c(cc(nc12)C(F)(F)F)-c1ccc(C(N)=O)c(NC(C)(C)C)c1	0	21	21	8	14	0.7846	12	1	0	18	0	-0.3249	0.6681	5.90762	4.162	4	1
505	6.553	280	CCCNc1cc(ccc1-c1cc(nc2c(cccc12)-n1cnc(c1)-c1cnn(C)c1)C(F)(F)F)C(N)=O	0	21	21	9	15	0.7648	13	1	0	18	0	-0.3036	-0.4839	5.60091	2.966	3	1
506	6.456	350	NC(=O)c1ccc(cn1)-c1cc(nc2c(cccc12)-n1cnc(c1)-c1cccnc1)C(F)(F)F	0	22	22	9	15	0.7999	11	1	0	22	0	-0.3488	-1.5315	3.01345	1.601	1	1
507	6.658	220	CCNc1cc(ccc1C(N)=O)-c1cc(nc2c(cccc12)-n1cnc(c1)-c1cnn(CC)c1)C(F)(F)F	0	21	21	9	14	0.7845	11	1	0	18	0	-0.3249	0.3443	5.69371	3.671	5	1
508	6.237	580	CCn1cc(cn1)-c1cn(cn1)-c1cccc2c(cc(nc12)C(F)(F)F)-c1ccc(C(N)=O)c(NC(C)(C)C)c1	0	21	21	7	15	0.7849	11	1	0	18	0	-0.3249	0.9185	6.39052	4.585	6	1
509	6.638	230	CCNc1cc(ccc1C(N)=O)-c1cc(nc2c(cccc12)-n1cnc(c1)-c1cnn(c1)C(F)F)C(F)(F)F	0	21	21	9	15	0.7906	12	1	0	18	0	-0.3249	0.9158	5.78252	3.962	3	1
510	6.102	790	CC(C)(C)Nc1cc(ccc1C(N)=O)-c1cc(nc2c(cccc12)-n1cnc(c1)-c1cnn(c1)C(F)F)C(F)(F)F	0	21	21	8	15	0.791	12	1	0	18	0	-0.3249	1.49	7.48203	4.876	4	1
511	7	100	Cc1cc2c(cccc2c(n1)-c1ccc(C(N)=O)c(NC(C)(C)C)c1)-n1cnc(c1)-c1cnn(C)c1	0	21	21	10	16	0.6569	12	1	0	21	0	-0.3089	0.1162	5.44451	3.215	4	1
512	6.301	500	Cc1cc(ccc1-c1cc(nc2c(cccc12)-n1cnc(c1)-c1cnn(c1)C(F)F)C(F)(F)F)C(N)=O	0	21	21	7	14	0.7303	9	1	0	18	0	-0.3808	1.8767	4.83336	3.953	2	1
513	6.398	400	Cc1cc2c(cccc2c(n1)-c1ccc(cc1C)C(N)=O)-n1cnc(c1)-c1cnn(C)c1	0	21	21	9	15	0.5974	12	1	0	21	0	-0.3663	-0.1401	3.28843	1.944	2	1
514	6.854	140	Cn1cc(cn1)-c1cn(cn1)-c1cccc2c(nccc12)-c1ccc(C(N)=O)c(NC(C)(C)C)c1	0	21	21	10	15	0.6457	12	1	0	21	0	-0.3119	-0.9526	4.83193	2.665	3	1
515	6.796	160	Cc1cc(-c2ccc(C(N)=O)c(NC(C)(C)C)c2)c2cccc(-n3cnc(c3)-c3cnn(C)c3)c2n1	0	21	21	8	14	0.679	12	1	0	18	0	-0.3342	-0.4201	5.95312	3.463	4	1
516	7.097	80	COCCNc1cc(ccc1C(N)=O)-c1nc(C)cc2c(cccc12)-n1cnc(c1)-c1cnn(C)c1	0	21	21	9	14	0.6565	11	1	0	21	0	-0.3089	-0.946	4.8925	1.725	3	1
517	6.569	270	Cc1ccc(cn1)-c1cn(cn1)-c1cccc2c(cc(nc12)C(F)(F)F)-c1ccc(C(N)=O)c(NC(C)(C)C)c1	0	23	23	8	13	0.7461	12	1	0	20	0	-0.4143	0.1622	6.63356	4.146	5	1
518	6.469	340	Cc1ccc(cn1)-c1cn(cn1)-c1cccc2c(cc(nc12)C(F)(F)F)-c1ccc(cc1C)C(N)=O	0	23	23	9	14	0.6854	12	1	0	20	0	-0.4702	0.4422	5.50589	3.26	3	1
519	6.921	120	Cc1cc(-c2ccc(C(N)=O)c(N)c2)c2cccc(-n3cnc(c3)-c3cnn(C)c3)c2n1	0	21	21	9	15	0.6759	12	1	0	18	0	-0.3344	-1.7832	4.32492	1.7	1	1
520	6.602	250	Cc1cc(-c2ccc(cc2C)C(N)=O)c2cccc(-n3cnc(c3)-c3cnn(C)c3)c2n1	0	21	21	9	15	0.6182	13	1	0	18	0	-0.3902	-0.1401	4.82545	2.577	2	1
521	6.921	120	CCc1cc(-c2ccc(C(N)=O)c(NC(C)(C)C)c2)c2cccc(-n3cnc(c3)-c3cnn(C)c3)c2n1	0	21	21	9	15	0.6818	12	1	0	18	0	-0.334	-0.3439	6.34322	3.716	4	1
522	7.222	60	CCc1cc(-c2ccc(C(N)=O)c(N)c2)c2cccc(-n3cnc(c3)-c3cnn(C)c3)c2n1	0	21	21	9	14	0.6787	11	1	0	18	0	-0.3342	-1.707	4.71502	1.953	1	1
523	6.398	400	Cn1cc(cn1)-c1cn(cn1)-c1cccc2c(cc(nc12)C1CC1)-c1ccc(C(N)=O)c(NC(C)(C)C)c1	0	24	21	10	16	0.6851	12	1	0	18	0	-0.3337	-0.0635	5.75532	3.669	3	1
524	7	100	Cn1cc(cn1)-c1cn(cn1)-c1cccc2c(cc(nc12)C1CC1)-c1ccc(C(N)=O)c(N)c1	0	24	21	9	17	0.682	12	1	0	18	0	-0.3339	-1.4266	4.12712	1.906	0	1
525	6.42	380	NC(=O)c1ccc(cc1N)-c1cc(nc2c(cccc12)-c1cnc2ccccc2c1)C(F)(F)F	0	24	24	7	15	0.4484	13	1	0	21	0	-0.5951	1.6333	5.41763	2.787	1	1
526	6.076	840	CC(C)OCCNc1cc(ccc1C(N)=O)-c1cc(nc2c(cccc12)-c1cnc2ccccc2c1)C(F)(F)F	0	24	24	8	15	0.4512	11	1	0	21	0	-0.5949	1.8841	7.27242	3.943	5	1
527	6.301	500	CC(C)c1cc(-c2ccc(C(N)=O)c(NC(C)(C)C)c2)c2cccc(-n3cnc(c3)-c3cnn(C)c3)c2n1	0	21	21	9	15	0.6846	12	1	0	18	0	-0.3337	0.3043	6.58922	4.009	5	1
528	7.097	80	CC(C)c1cc(-c2ccc(C(N)=O)c(N)c2)c2cccc(-n3cnc(c3)-c3cnn(C)c3)c2n1	0	21	21	9	15	0.6815	12	1	0	18	0	-0.3339	-1.0588	4.96102	2.246	2	1
529	7.155	70	NC(=O)c1ccc(cc1NC1CCC(O)CC1)-c1nc(nc2c(cccc12)-c1cnc2ccccc2c1)C(F)(F)F	0	29	23	9	15	0.6486	10	1	0	23	0	-0.5449	-0.3924	6.85236	2.697	1	1
530	6.854	140	NC(=O)c1ccc(cc1NC1CCC(O)CC1)-c1nc(nc2c(cccc12)-c1cnc2ccccc2c1)C1CC1	0	32	23	9	18	0.5464	12	1	0	23	0	-0.5449	-1.124	6.99735	2.204	0	1
531	6.538	290	NC(=O)c1ccc(cc1NC1CCC(O)CC1)-c1ccnc2c(cccc12)-c1cnc2ccccc2c1	0	30	24	9	18	0.3347	13	1	0	21	0	-0.6074	-0.777	5.61833	2.957	0	1
532	6.602	250	Cc1ccc(cn1)-c1cn(cn1)-c1cccc2c(cc(nc12)C(F)(F)F)-c1ccc(C(N)=O)c(N)c1	0	23	23	7	15	0.743	11	1	0	20	0	-0.4145	-1.2009	5.00536	2.383	2	1
533	6.081	830	CCNc1cc(ccc1C(N)=O)-c1cccc2c(ccnc12)-n1cnc(c1)-c1cnn(C)c1	0	21	21	9	15	0.6619	11	1	0	20	0	-0.3288	-1.0395	5.41601	2.616	2	1
534	6.721	190	CCc1cc(-c2ccc(C(N)=O)c(N)c2)c2cccc(-c3cnc4ccccc4c3)c2n1	0	24	24	7	15	0.3455	13	1	0	21	0	-0.6041	0.6213	5.45062	2.341	1	1
535	6.745	180	CC(C)c1cc(-c2ccc(C(N)=O)c(N)c2)c2cccc(-c3cnc4ccccc4c3)c2n1	0	24	24	7	15	0.3483	13	1	0	21	0	-0.6038	1.2695	5.69662	2.634	2	1
536	7.046	90	CCc1cc(-c2ccc(C(N)=O)c(N)c2)c2cccc(-n3cnc(c3)-c3cccnc3)c2n1	0	23	23	9	15	0.6293	11	1	0	20	0	-0.4268	-2.1514	4.24048	1.756	1	1
537	6.796	160	CC(C)c1cc(-c2ccc(C(N)=O)c(N)c2)c2cccc(-n3cnc(c3)-c3cccnc3)c2n1	0	23	23	9	14	0.6321	11	1	0	20	0	-0.4265	-1.5032	4.48648	2.049	2	1
538	6.886	130	CCc1cc(-c2ccc(C(N)=O)c(N)c2)c2cccc(-n3cnc(c3)-c3ccc(C)nc3)c2n1	0	23	23	9	15	0.6402	12	1	0	20	0	-0.4236	-2.2129	4.63058	1.937	2	1
539	6.796	160	CC(C)c1cc(-c2ccc(C(N)=O)c(N)c2)c2cccc(-n3cnc(c3)-c3ccc(C)nc3)c2n1	0	23	23	9	15	0.643	12	1	0	20	0	-0.4233	-1.5647	4.87658	2.23	3	1
540	5.815	1530	CC(C)(C)Nc1cc(ccc1C(N)=O)-c1nccc2c(cccc12)-c1cnc2ccccc2c1	0	24	24	7	16	0.3261	12	1	0	24	0	-0.5985	1.3757	6.3901	3.264	3	1
541	6.678	210	CC(C)(C)Nc1cc(ccc1C(N)=O)-c1nccc2c(cccc12)-n1cnc(c1)-c1cccnc1	0	23	23	10	15	0.5962	12	1	0	23	0	-0.4045	-0.803	4.14897	2.874	3	1
542	6.509	310	Cn1cc(cn1)-c1cn(cn1)-c1cccc2c(nccc12)-c1ccc(C(N)=O)c(N)c1	0	21	21	8	15	0.6425	12	1	0	21	0	-0.3121	-2.3157	3.20373	0.902	0	1
543	7.046	90	CC(C)c1cc(-c2ccc(C(N)=O)c(N)c2)c2cccc(-n3cnc(c3)-c3ccc[n+]([O-])c3)c2n1	0	23	23	9	15	0.9977	12	1	0	20	0	-0.3751	-1.6195	4.29691	1.351	2	1
544	6.959	110	Cn1cc(cn1)-c1cn(cn1)-c1cccc2c(ccnc12)-c1ccc(C(N)=O)c(NC(C)(C)C)c1	0	21	21	9	16	0.668	12	1	0	18	0	-0.3375	-0.3586	4.97512	3.282	3	1
545	6.585	260	CC(C)(C)Nc1cc(ccc1C(N)=O)-c1ccnc2c(cccc12)-n1cnc(c1)-c1cccnc1	0	23	23	9	16	0.6186	12	1	0	20	0	-0.4301	-0.803	5.50328	3.085	3	1
546	6.495	320	Cn1cc(cn1)-c1cn(cn1)-c1cccc2c(ccnc12)-c1ccc(C(N)=O)c(N)c1	0	21	21	9	15	0.6649	12	1	0	18	0	-0.3377	-1.7217	3.34692	1.519	0	1
547	6.076	840	NC(=O)c1ccc(cc1N)-c1ccnc2c(cccc12)-n1cnc(c1)-c1cccnc1	0	23	23	8	14	0.6155	12	1	0	20	0	-0.4303	-2.7601	2.35408	0.916	0	1
548	6.77	170	CC(C)c1nn(-c2ccc(C(N)=O)c(NC(C)(C)C)c2)c2cccc(-n3cnc(c3)-c3cccnc3)c12	0	21	21	6	13	0.7386	10	1	1	21	0	-0.3189	0.1573	5.43701	5.203	5	1
549	6.131	740	CC(C)c1nn(-c2ccc(cc2Cl)C(N)=O)c2cccc(-n3cnc(c3)-c3cccnc3)c12	0	21	21	6	12	0.7609	9	1	0	21	0	-0.3338	-0.2064	5.67571	2.479	2	1
550	6.796	160	CC(C)c1nn(-c2ccc(cc2C)C(N)=O)c2cccc(-n3cnc(c3)-c3cccnc3)c12	0	21	21	5	13	0.6775	9	1	0	21	0	-0.3749	-0.1287	5.10504	2.083	3	1
551	6.62	240	CC(C)c1nn(-c2ccc(cc2Cl)C(N)=O)c2cccc(-n3cnc(c3)-c3cnn(C)c3)c12	0	19	19	5	13	0.8104	10	1	0	19	0	-0.2412	0.238	6.15025	2.676	2	1
552	7	100	CCc1cc(ccc1-n1nc(C(C)C)c2c(cccc12)-n1cnc(c1)-c1cnn(C)c1)C(N)=O	0	19	19	7	13	0.7272	10	1	0	19	0	-0.2793	-0.0194	6.05925	2.744	3	1
553	6.432	370	CC(C)c1nn(-c2ccc(nc2)C(N)=O)c2cccc(-n3cnc(c3)-c3cnn(C)c3)c12	0	18	18	4	13	0.8842	9	1	0	18	0	-0.1922	-1.8262	4.59171	1.683	2	1
554	6.959	110	CC(C)c1nn(-c2ccc(cc2C)C(N)=O)c2cccc(-n3cnc(c3)-c3cnn(C)c3)c12	0	19	19	4	13	0.727	9	1	0	19	0	-0.2823	0.3157	5.57958	2.28	3	1
555	6.585	260	CC(C)c1nn(-c2ccc(C(N)=O)c(NC(C)(C)C)c2)c2cccc(-n3cnc(c3)-c3cnn(C)c3)c12	0	19	19	6	13	0.7881	10	1	1	19	0	-0.2263	0.6932	6.70725	4.112	5	1
556	6.602	250	CC(C)Nc1cc(ccc1-n1nc(C(C)C)c2c(cccc12)-n1cnc(c1)-c1cccnc1)C(N)=O	0	21	21	7	12	0.7507	9	1	2	21	0	-0.3309	-1.3901	6.4427	2.756	4	1
557	6.523	300	CC(C)c1nn(-c2ccc(cc2NC2CCC2)C(N)=O)c2cccc(-n3cnc(c3)-c3cccnc3)c12	0	25	21	6	12	0.7507	11	1	2	21	0	-0.3309	-2.3567	5.98671	2.774	2	1
558	6.921	120	CC(C)Nc1cc(ccc1-n1nc(C(C)C)c2c(cccc12)-n1cnc(c1)-c1cnn(C)c1)C(N)=O	0	19	19	7	12	0.8002	9	1	2	19	0	-0.2383	-0.2882	6.91724	3.266	4	1
559	6.699	200	CC(C)c1nn(-c2ccc(cc2NC2CCC2)C(N)=O)c2cccc(-n3cnc(c3)-c3cnn(C)c3)c12	0	23	19	6	12	0.8002	11	1	2	19	0	-0.2383	-1.2548	6.46125	3.284	2	1
560	6.569	270	Cn1cc(cn1)-c1cn(cn1)-c1cccc2n(nc(c12)C(F)(F)F)-c1ccc(C(N)=O)c(NC(C)(C)C)c1	0	19	19	6	12	0.8968	11	1	1	19	0	-0.2262	0.3995	5.91107	3.952	4	1
561	6.638	230	CCNc1cc(ccc1C(N)=O)-n1nc(c2c(cccc12)-n1cnc(c1)-c1cnn(C)c1)C(F)(F)F	0	19	19	6	12	0.8964	9	1	1	19	0	-0.2262	-0.2814	6.13775	3.075	3	1
562	6.538	290	CC(C)(C)Nc1cc(ccc1C(N)=O)-n1nc(c2c(cccc12)-n1cnc(c1)-c1cccnc1)C(F)(F)F	0	21	21	8	13	0.8473	10	1	1	21	0	-0.3188	-0.0449	6.44181	3.755	4	1
563	6.31	490	Cc1cc(ccc1-n1nc(c2c(cccc12)-n1cnc(c1)-c1cccnc1)C(F)(F)F)C(N)=O	0	21	21	7	13	0.7862	10	1	0	21	0	-0.3748	0.2351	4.65934	2.236	2	1
564	7.046	90	CCc1cc(ccc1-n1nc(c2c(cccc12)-n1cnc(c1)-c1cnn(C)c1)C(F)(F)F)C(N)=O	0	19	19	7	13	0.8359	10	1	0	19	0	-0.2792	0.3444	5.66826	2.897	2	1
565	6.77	170	CCc1cc(ccc1-n1nc(c2c(cccc12)-n1cnc(c1)-c1cccnc1)C(F)(F)F)C(N)=O	0	21	21	7	13	0.7864	10	1	0	21	0	-0.3718	-0.1	5.19372	2.7	2	1
566	6.854	140	CC(C)Nc1cc(ccc1-n1nc(c2c(cccc12)-n1cnc(c1)-c1cnn(C)c1)C(F)(F)F)C(N)=O	0	19	19	7	12	0.9088	10	1	2	19	0	-0.2382	-0.5819	6.52625	3.106	3	1
567	6.824	150	Cn1cc(cn1)-c1cn(cn1)-c1cccc2n(nc(c12)C(F)(F)F)-c1ccc(cc1NC1CCC1)C(N)=O	0	23	19	5	12	0.9088	9	1	2	19	0	-0.2382	-1.5485	5.66507	3.124	1	1
568	6.854	140	CC(C)Nc1cc(ccc1-n1nc(c2c(cccc12)-n1cnc(c1)-c1cccnc1)C(F)(F)F)C(N)=O	0	21	21	7	12	0.8593	9	1	2	21	0	-0.3308	-1.0263	6.05171	2.909	3	1
569	6.553	280	NC(=O)c1ccc(c(NC2CCC2)c1)-n1nc(c2c(cccc12)-n1cnc(c1)-c1cccnc1)C(F)(F)F	0	25	21	7	16	0.8593	12	1	2	21	0	-0.3308	-1.9929	5.59572	2.927	1	1
570	7.097	80	Cn1cc(cn1)-c1cn(cn1)-c1cccc2n(nc(c12)C(F)(F)F)-c1ccc(cc1N)C(N)=O	0	19	19	6	13	0.9059	10	1	0	19	0	-0.2384	-0.9636	4.28287	1.76	1	1
571	7	100	NC(=O)c1ccc(c(N)c1)-n1nc(c2c(cccc12)-n1cnc(c1)-c1cccnc1)C(F)(F)F	0	21	21	6	13	0.8564	10	1	0	21	0	-0.331	-1.408	4.21352	1.563	1	1
572	6.721	190	Cc1cn(-c2ccc(C(N)=O)c(NC(C)(C)C)c2)c2cccc(-n3cnc(c3)-c3cnn(C)c3)c12	0	20	20	7	14	0.6639	11	1	1	20	0	-0.254	-0.1998	5.81168	3.779	4	1
573	6.367	430	Cc1cn(-c2ccc(C(N)=O)c(NC(C)(C)C)c2)c2cccc(-n3cnc(c3)-c3cccnc3)c12	0	22	22	7	14	0.6144	11	1	1	22	0	-0.3466	-0.6442	5.33714	3.582	4	1
574	6.585	260	CCc1cn(-c2ccc(C(N)=O)c(NC(C)(C)C)c2)c2cccc(-n3cnc(c3)-c3cnn(C)c3)c12	0	20	20	5	14	0.6645	10	1	1	20	0	-0.2511	-0.5349	6.34606	4.243	4	1
575	6.921	120	CCCc1cn(-c2ccc(cc2CC)C(N)=O)c2cccc(-n3cnc(c3)-c3cnn(C)c3)c12	0	20	20	6	14	0.6037	10	1	1	20	0	-0.304	-0.3603	6.08816	4.666	2	1
576	6.602	250	CCCc1cn(-c2ccc(C(N)=O)c(NC(C)(C)C)c2)c2cccc(-n3cnc(c3)-c3cnn(C)c3)c12	0	20	20	7	14	0.6645	11	1	2	20	0	-0.2509	-1.0161	6.73616	4.812	4	1
577	6.796	160	CCc1cc(ccc1-n1cc(C(C)C)c2c(cccc12)-n1cnc(c1)-c1cnn(C)c1)C(N)=O	0	20	20	8	14	0.6043	11	1	0	20	0	-0.3014	0.3869	6.25906	4.605	3	1
578	6.377	420	CC(C)c1cn(-c2ccc(C(N)=O)c(NC(C)(C)C)c2)c2cccc(-n3cnc(c3)-c3cnn(C)c3)c12	0	20	20	7	14	0.6651	11	1	1	20	0	-0.2483	0.6932	6.90706	5.013	5	1
579	5.311	4890	Oc1ccccc1-c1cc(c(O)cc1O)-n1c2ccccc2[nH]c1=O	0	19	19	6	13	1.0454	10	0	0	16	0	-0.4034	-0.2566	3.45017	1.234	0	0
580	6.668	215	Oc1cc(O)c(cc1-c1ccc(Cl)cc1)-n1c2ccccc2[nH]c1=O	0	19	19	9	16	0.9311	12	0	0	16	0	-0.419	0.6752	4.39797	1.681	0	0
581	5.27	5370	COC(=O)c1cc(c(O)cc1OC)-n1c2c(Cl)cc(cc2[nH]c1=O)C(F)(F)F	0	13	13	6	12	1.1232	11	0	0	13	0	-0.0707	0.4456	3.07928	2.72	1	0
582	5.171	6750	CC(C)c1ccc(O)c(c1)-c1cc(c(O)cc1O)-n1c2ccc(cc2[nH]c1=O)C(F)(F)F	0	19	19	6	14	1.1032	10	0	0	16	0	-0.2956	1.0232	5.25127	3.474	3	0
583	6.785	164	Oc1cc(O)c(cc1CCC1CCCCC1)-n1c2ccccc2[nH]c1=O	0	19	13	8	17	0.8592	13	0	1	13	0	-0.2225	-1.2422	4.54207	4.192	0	0
584	5.181	6590	Oc1cc(O)c(cc1Cl)-n1c2cc(ccc2[nH]c1=O)-c1ccccc1	0	19	19	6	14	0.9618	12	0	0	16	0	-0.4535	0.6752	4.39797	2.947	0	0
585	5.073	8450	Oc1cc(O)c(cc1-c1ccc(OC(F)(F)F)cc1)-n1c2ccc(cc2[nH]c1=O)C(F)(F)F	0	19	19	7	17	1.0776	12	0	0	16	0	-0.2837	2.8467	5.32087	3.476	1	0
586	6.714	193	Oc1cc(O)c(cc1-c1ccc(Cl)cc1Cl)-n1c2ccc(cc2[nH]c1=O)C(F)(F)F	0	19	19	7	16	1.0457	13	0	0	16	0	-0.2488	1.9464	5.72907	3.138	1	0
587	6.394	404	Oc1cc(O)c(cc1-c1cccc(c1)C(F)(F)F)-n1c2ccc(cc2[nH]c1=O)C(F)(F)F	0	19	19	5	16	1.003	11	0	0	16	0	-0.3514	2.1115	5.09997	3.286	2	0
588	5.511	3080	Oc1cc(O)c(cc1-c1ccnc2ccccc12)-n1c2ccccc2[nH]c1=O	0	22	22	10	20	0.9993	14	0	0	22	0	-0.4616	-0.8446	3.07562	1.197	0	0
589	6.256	555	Oc1cc(O)c(cc1-c1cccc(OC(F)(F)F)c1)-n1c2ccc(cc2[nH]c1=O)C(F)(F)F	0	19	19	5	16	1.0783	11	0	0	16	0	-0.2843	2.8467	5.32087	3.687	1	0
590	6.237	579	OCc1cc(O)c(cc1Cl)-n1c2ccccc2[nH]c1=O	0	13	13	7	12	0.7583	9	0	1	13	0	-0.2184	-0.4182	1.75918	0.336	1	0
591	5.287	5170	Oc1cc(CBr)c(Cl)cc1-n1c2ccccc2[nH]c1=O	0	13	13	6	9	0.7569	8	0	1	13	0	-0.2347	0.9309	3.53237	1.948	1	0
592	5.212	6140	Oc1cc(O)c(cc1-c1cccnc1O)-n1c2ccccc2[nH]c1=O	0	18	18	9	12	1.1942	11	0	0	18	0	-0.3042	-0.5441	2.69961	0.765	0	0
593	5.721	1900	CC1c2cc(c(O)cc2OC1(C)C)-n1c2ccccc2[nH]c1=O	0	15	13	7	12	0.8674	10	0	2	13	0	-0.2184	-0.2116	3.22748	1.826	3	0
594	5.429	3720	Oc1ccc(c(O)c1)-n1c2ncccc2[nH]c1=O	0	12	12	5	11	0.9981	10	0	0	12	0	-0.1233	-0.8583	1.42417	-0.165	0	0
595	5.052	8880	Cc1cc(nc(N)n1)-c1ccccc1-c1ccccc1	0	16	16	8	15	0.3423	13	0	0	13	0	-0.5602	1.4342	4.38271	2.394	1	0
596	6.742	181	Nc1nc(Cl)cc(n1)-c1ccc(cc1)C#N	1	10	10	6	9	0.4805	9	1	0	10	0	-0.19	0.8771	3.40757	-0.038	0	0
597	5.301	5000	CCCCOc1ccccc1-c1cc(C)nc(N)n1	0	10	10	5	9	0.5088	9	0	1	10	0	-0.202	-0.2624	3.94181	1.689	3	0
598	5.173	6710	CC(C)Oc1ccccc1-c1cc(C)nc(N)n1	0	10	10	5	9	0.5092	9	0	1	10	0	-0.202	0.3029	3.55011	1.222	3	0
599	6.063	864	COc1cccc(OC)c1-c1cc(C)nc(N)n1	0	10	10	6	9	0.6898	9	0	2	10	0	-0.1072	-0.1456	2.78011	0.368	1	0
600	5.924	1190	Nc1nc(cc(n1)C(F)(F)F)-c1ccccc1Cl	0	10	10	5	9	0.5097	6	0	0	10	0	-0.2207	1.8789	5.07868	1.375	1	0
601	5.308	4920	Nc1nc(NCCO)cc(n1)-c1ccc(Cl)cc1Cl	0	10	10	6	9	0.5356	8	0	0	10	0	-0.1169	0.3414	3.99868	0.16	2	0
602	4.666	21600	Nc1nc(NCCN2CCOCC2)cc(n1)-c1ccc(Cl)cc1Cl	0	14	10	5	9	0.5356	6	0	0	10	0	-0.1169	0.7072	4.33858	0.322	6	0
603	5.338	4590	Nc1nc(cc(n1)-c1ccc(cc1Cl)C(F)(F)F)-c1ccc(cc1Cl)C(F)(F)F	0	16	16	6	13	0.6212	9	0	0	16	0	-0.2716	4.1623	7.66528	3.228	2	0
604	5.719	1910	Nc1nc(cc(n1)-c1ccc(Cl)cc1Cl)-c1ccoc1	0	14	14	6	11	0.7153	9	0	0	14	0	-0.141	0.6934	5.90288	1.361	0	0
605	4.936	11600	Cc1ccccc1-c1cc(nc(N)n1)-c1ccc(Cl)cc1Cl	0	16	16	6	12	0.4847	9	0	0	16	0	-0.4008	2.8037	5.22961	2.493	1	0
606	4.824	15000	CCOc1cccc(c1)-c1cc(nc(N)n1)-c1ccc(Cl)cc1Cl	0	16	16	6	12	0.6062	9	0	0	16	0	-0.2671	2.1091	6.10108	2.131	2	0
607	5.233	5850	COc1ccc(c(OC)c1)-c1cc(nc(N)n1)-c1ccc(Cl)cc1Cl	0	16	16	5	13	0.8056	9	0	1	16	0	-0.191	1.3601	5.71958	1.948	0	0
608	5.264	5440	Nc1nc(c(C=O)c(n1)-c1ccc(Cl)cc1Cl)-c1ccc(Cl)cc1Cl	0	16	16	5	13	0.6834	9	0	0	16	0	-0.2338	2.8134	7.37447	2.236	0	0
609	6.842	144	CCNC(=O)CO\N=C\c1c(Cl)nc(N)nc1-c1ccc(Cl)cc1Cl	1	10	10	7	9	0.6181	9	1	0	10	0	-0.1169	1.0143	3.77588	1.522	3	1
610	4.357	44000	Cc1cc(CO)n(n1)-c1cc(C)nc(N)n1	0	7	7	4	6	0.5563	6	0	0	7	0	-0.0153	-1.3573	0.80253	-0.836	3	0
611	7.115	76.7	CCOC(=O)CO\N=C\c1c(Cl)nc(N)nc1-c1ccc(Cl)cc1Cl	1	10	10	6	9	0.6181	9	1	0	10	0	-0.1169	1.558	4.20288	2.053	3	0
612	6.413	386	CN(CCc1ccccc1)C(=O)c1cc(C)n(n1)-c1cc(C)nc(N)n1	0	13	13	9	12	0.6155	11	1	1	7	0	-0.3559	0.4635	2.44982	1.157	3	1
613	5.328	4700	CN(CCc1ccccn1)C(=O)c1cc(C)n(n1)-c1cc(C)nc(N)n1	0	12	12	6	11	0.6862	10	1	0	12	0	-0.1508	-1.4528	2.08857	-0.314	3	1
614	5.533	2930	COc1ccc(Nc2ccc(NC(=O)c3cc(C)n(n3)-c3cc(C)nc(N)n3)cc2)cc1	0	19	19	5	18	0.8326	11	0	0	10	0	-0.2739	-0.5664	4.85989	0.924	2	1
615	5.32	4790	Cc1cc(CNc2nccs2)n(n1)-c1cc(C)nc(N)n1	0	10	10	5	9	0.743	9	0	0	10	0	-0.019	-1.3939	2.97892	-0.097	3	0
616	4.67	21400	Cc1cc(C=C)nc(N)n1	0	4	4	3	3	0.3257	3	0	0	4	0	-0.0151	-0.0783	1.4122	-0.212	1	0
617	5.939	1150	CC(C)(C)OC(=O)\C=C\c1c(Cl)nc(N)nc1-c1ccc(Cl)cc1Cl	1	10	10	5	9	0.5941	9	0	0	10	0	-0.1169	2.9901	5.31178	2.901	3	0
618	7.565	27.2	Nc1nc(Cl)c(C#N)c(n1)-c1ccc(Cl)cc1Cl	1	10	10	5	9	0.6915	9	1	0	10	0	-0.1168	1.7212	4.65966	1.116	0	0
619	4.301	50000	Cc1cc(NCCCCNC(=O)OC(C)(C)C)nc(N)n1	0	4	4	0	2	0.3836	1	0	1	4	0	-0.0007	-0.3533	2.66871	0.765	6	1
620	4.301	50000	Cc1cc(\C=C\CCO\C=C2/CCOC2=O)nc(N)n1	0	8	4	6	6	0.326	6	0	1	4	0	-0.0151	-0.8212	1.94609	0.039	3	0
621	4.301	50000	Cc1cc(N)n(n1)-c1cc(C)nc(N)n1	0	7	7	4	6	0.6097	6	0	0	7	0	0	-1.2024	1.23193	-0.36	2	0
622	4.301	50000	Cc1cc(CN)nc(N)n1	0	4	4	3	3	0.3167	3	1	0	4	0	-0.0179	-1.5241	0.12582	-1.605	2	0
623	4.301	50000	Cc1cc(CNC(=O)N2CCN(C2=O)S(C)(=O)=O)nc(N)n1	0	7	4	2	5	0.3202	5	1	0	4	0	-0.0176	-3.1028	-0.93328	-2.481	4	3
624	5.078	8360	Oc1ccc(Sc2ccc(O)c(Br)c2)cc1Br	0	12	12	6	12	0.4102	10	0	0	0	0	-0.186	2.283	4.57768	3.059	0	0
625	4.301	50000	O=C1c2ccccc2-c2ccccc12	0	13	12	9	13	0.06	13	0	0	0	0	-0.4644	1.7606	2.91479	2.02	0	0
626	4.301	50000	CCOC(=O)C1Cc2cc(C(=O)c3ccccc3F)c(O)c(O)c2O1	0	14	12	5	9	0.8072	8	0	0	0	0	-0.2341	0.3058	2.3345	2.293	2	0
627	5.255	5560	Oc1ccc(cc1)C(=O)c1ccc(O)c(Cl)c1Cl	0	12	12	6	12	0.493	10	0	0	0	0	-0.198	1.763	4.00619	1.992	0	0
628	4.785	16400	COc1ccc(cc1)C(=O)c1ccc(O)c(Cl)c1Cl	0	12	12	6	12	0.4962	10	0	0	0	0	-0.1976	1.8275	4.43939	2.313	0	0
629	5.9	1260	Cc1nn(C)c(O)c1-c1cc(O)c2ccccc2c1O	0	13	13	8	12	0.7069	9	0	0	8	0	-0.2311	0.811	4.03979	1.992	1	0
630	4.301	50000	CCOC(=O)COc1ccc(C(=O)c2ccc(O)c(Cl)c2)c(Cl)c1Cl	0	12	12	5	10	0.6003	8	0	0	0	0	-0.1582	2.1537	5.02609	3.016	3	0
631	4.569	27000	Oc1ccc(C(=O)c2ccc(F)cc2)c(Cl)c1Cl	0	12	12	6	12	0.4995	10	0	0	0	0	-0.212	2.2359	4.43969	2.189	0	0
632	4.728	18700	CCOc1ccc(cc1)C(=O)c1ccc(O)c(Cl)c1Cl	0	12	12	6	12	0.4966	11	0	0	0	0	-0.1976	2.0779	4.82949	2.736	2	0
633	5.297	5050	CCO\N=C(\CC)c1cc(C(=O)c2ccccc2)c(O)cc1O	0	12	12	7	10	0.4117	8	1	0	0	0	-0.3206	1.0091	3.62909	3.209	3	0
634	4.301	50000	Oc1ccc(C(=O)c2cccs2)c(Cl)c1Cl	0	10	10	7	10	0.4135	8	0	0	0	0	-0.1854	1.6767	4.36209	2.423	0	0
635	4.578	26400	Oc1ccc(C(=O)c2ccccc2C(F)(F)F)c(Cl)c1Cl	0	12	12	6	12	0.4531	10	0	0	0	0	-0.2861	3.2286	4.97829	3.375	1	0
636	5.521	3010	COc1ccc(cc1)C(=O)c1cc(Cl)c(O)cc1O	0	12	12	5	12	0.5844	10	0	0	0	0	-0.1591	0.8957	3.49159	2.084	0	0
637	4.947	11300	CCN(CC)c1nc(NCc2ccccc2)nc2[nH]cnc12	0	11	11	3	7	0.781	4	0	0	8	0	-0.3292	0.3286	3.32727	1.806	5	0
638	4.642	22800	CNc1ccc(cc1)C(=O)c1ccc(O)c(Cl)c1Cl	0	12	12	6	12	0.4029	10	0	0	0	0	-0.2428	1.5612	4.57179	2.044	0	0
639	4.301	50000	Oc1ccc(C(=O)c2ccccc2)c(O)c1O	0	12	12	5	11	0.6262	9	0	0	0	0	-0.345	0.4625	2.40499	2.677	0	0
640	4.301	50000	COc1ccc(cc1)C(=O)c1ccc(O)c(Cl)c1N1CCCCC1	0	17	12	9	17	0.4911	14	0	0	0	0	-0.1971	0.1844	4.77629	3.254	2	0
641	4.301	50000	COc1ccc(cc1)C(=O)c1ccc(O)c(Br)c1	0	12	12	6	12	0.3568	10	0	0	0	0	-0.2328	1.5428	3.89509	1.912	0	0
642	4.301	50000	O=C1NC(=O)c2ccccc2C1=O	0	9	6	4	6	0.0871	6	1	0	0	0	-0.2209	0.0903	1.75165	0.114	0	1
643	5.367	4300	Oc1ccc(Sc2ccc(O)cc2O)c(O)c1	0	12	12	6	12	0.6624	12	0	0	0	0	-0.1198	0.2514	2.46388	1.391	0	0
644	4.51	30900	Cc1cc(Sc2ccc(O)c(C)c2)ccc1O	0	12	12	6	12	0.266	11	0	0	0	0	-0.226	2.2704	3.58873	1.915	2	0
645	4.9	12600	Oc1ccc(cc1)C(=O)c1cc(Cl)c(O)c(c1)N1CCCCC1	0	17	12	8	13	0.4798	10	0	0	0	0	-0.1891	0.1199	4.71368	2.933	2	0
646	4.597	25300	Oc1ccc(cc1)C(=O)c1ccc(O)cc1Cl	0	12	12	6	12	0.3537	12	0	0	0	0	-0.2007	1.3943	3.35279	1.415	0	0
647	5.056	8800	Oc1cc(O)c(cc1Cl)C(=O)c1ccccc1	0	12	12	8	12	0.4641	10	0	0	0	0	-0.3112	1.3943	3.72338	2.477	0	0
648	4.506	31200	Oc1ccc(C(=O)c2ccccc2)c(O)c1	0	12	12	6	12	0.3597	10	0	0	0	0	-0.3489	1.0256	2.69939	1.9	0	0
649	5.558	2770	Oc1ccc(cc1)C(=O)c1cc(Cl)ccc1O	0	12	12	6	12	0.3741	10	0	0	0	0	-0.221	1.3943	3.35279	1.844	0	0
650	5.143	7200	Nc1cc(O)c(Cl)cc1C(=O)c1ccc(O)cc1	0	12	12	6	12	0.4456	10	0	0	0	0	-0.1612	0.1976	3.67269	1.352	0	0
651	4.301	50000	Oc1ccc(cc1Cl)C(=O)c1ccccc1	0	12	12	6	12	0.2643	10	0	0	0	0	-0.3802	1.9574	3.64719	2.129	0	0
652	5.201	6290	Oc1cccc(c1)C(=O)c1cc(Cl)c(O)cc1O	0	12	12	7	12	0.585	10	0	0	0	0	-0.1633	0.8312	3.05839	1.763	0	0
653	4.301	50000	Cc1c(O)c(CC=C)cc(C(=O)c2ccccc2F)c1O	0	12	12	7	10	0.5502	9	0	0	0	0	-0.2352	2.2149	3.57591	2.812	1	0
654	4.738	18270	Cc1cc(nc(N)n1)C(F)(F)F	0	4	4	3	3	0.4058	3	0	0	4	0	-0.0104	0.3123	1.68432	0.198	2	0
655	5.255	5560	Oc1cc(O)c2C(=O)c3ccccc3C(=O)c2c1O	0	14	12	8	14	0.7166	12	0	0	0	0	-0.2224	-0.1925	2.31998	0.976	0	0
656	5.061	8680	Oc1ccc(C(=O)c2cccc(O)c2)c(O)c1	0	12	12	7	12	0.4806	11	0	0	0	0	-0.201	0.4625	2.40499	1.186	0	0
657	4.301	50000	Oc1ccc(cc1)C(=O)c1ccc(O)cc1O	0	12	12	6	12	0.4768	12	0	0	0	0	-0.1972	0.4625	2.40499	1.186	0	0
658	4.301	50000	Nc1ccc(N)c2C(=O)c3c(O)c(O)cc(O)c3C(=O)c12	0	14	12	7	13	0.834	11	0	0	0	0	-0.0772	-2.5859	3.33037	-0.43	0	0
659	5.12	7590	Nc1nc(N)nc(n1)-c1ccccc1Cl	0	9	9	4	7	0.6922	7	0	0	9	0	-0.2136	-0.2438	3.32347	-0.659	0	0
660	4.301	50000	COc1cc(F)c(Cl)cc1C(=O)c1ccc(OCc2ccccc2)cc1	0	18	18	6	12	0.5822	10	0	0	0	0	-0.4655	2.5502	5.45899	3.265	1	0
661	4.693	20300	CC(C)(C)c1ccc(cc1)C(=O)c1ccc(O)cc1O	0	12	12	6	12	0.3597	10	0	0	0	0	-0.3211	2.3862	3.6263	3.672	3	0
662	4.301	50000	COC(=O)c1cc(cc(C(=O)OC)c1OC)C(=O)c1ccc(OC)cc1	0	12	12	7	10	0.5186	8	0	0	0	0	-0.2002	0.7858	2.508	1.742	0	0
663	7.222	60	CCNC(=O)c1noc(c1-c1ccc2CCCN(C)c2c1)-c1cc(C(C)C)c(O)cc1O	0	18	15	9	16	0.7892	15	1	1	13	0	-0.2218	0.2094	5.17057	3.736	5	1
664	7.222	60	CCNC(=O)c1noc(c1-c1ccc2N(C)CCCc2c1)-c1cc(C(C)C)c(O)cc1O	0	18	15	9	16	0.7886	14	1	1	13	0	-0.2212	0.2094	5.17057	3.525	5	1
665	7.222	60	CCNC(=O)c1noc(c1-c1ccc2C3CCC(N3)c2c1)-c1cc(C(C)C)c(O)cc1O	0	19	15	9	18	0.7559	16	2	1	13	0	-0.2643	-0.5381	4.05808	2.745	4	1
666	7.222	60	CCNC(=O)c1noc(c1-c1ccc2C3CCC(N3C)c2c1)-c1cc(C(C)C)c(O)cc1O	0	19	15	9	18	0.7559	16	2	1	13	0	-0.2639	-0.0022	4.40028	2.984	4	1
667	7.222	60	CCNC(=O)c1noc(c1-c1ccc2C3CCC(N3CC)c2c1)-c1cc(C(C)C)c(O)cc1O	0	19	15	9	18	0.7559	16	2	1	13	0	-0.2638	-1.0948	4.79038	4.222	6	1
668	7.222	60	CCNC(=O)c1noc(c1-c1ccc2C3CCC(N3C(C)C)c2c1)-c1cc(C(C)C)c(O)cc1O	0	19	15	9	18	0.7559	16	2	1	13	0	-0.2638	-1.3953	5.17888	4.682	6	1
669	7.222	60	CCNC(=O)c1noc(c1-c1ccc2C3CCC(N3CC(C)C)c2c1)-c1cc(C(C)C)c(O)cc1O	0	19	15	9	19	0.7559	15	2	1	13	0	-0.2638	-0.863	5.42648	4.877	7	1
670	7.222	60	CCNC(=O)c1noc(c1-c1cc2CN(C)CCc2s1)-c1cc(C(C)C)c(O)cc1O	0	16	13	8	15	0.7893	12	2	1	12	0	-0.1118	0.0302	3.48328	2.239	6	1
671	7.222	60	CCNC(=O)c1noc(c1-c1nc2CN(C)CCc2s1)-c1cc(C(C)C)c(O)cc1O	0	15	12	7	14	0.9816	11	2	1	11	0	-0.0431	-0.2073	3.82588	1.751	6	1
672	7.222	60	CCNC(=O)c1noc(c1-c1ccc2CN(C)CCc2n1)-c1cc(C(C)C)c(O)cc1O	0	17	14	7	16	0.9019	14	2	1	13	0	-0.1439	-0.4608	3.40632	2.172	6	1
673	7.222	60	CC(C)c1cc(-c2onc(-c3nnc(C)[nH]3)c2-c2ccc3CN(C)CCc3c2)c(O)cc1O	0	20	17	9	18	1.049	14	1	0	15	0	-0.2864	0.8035	4.53311	4.029	5	0
674	7.222	60	CCc1cnc([nH]1)-c1noc(c1-c1ccc2CN(C)CCc2c1)-c1cc(C(C)C)c(O)cc1O	0	21	18	9	19	0.9804	13	1	0	16	0	-0.2864	-0.5329	5.13868	3.195	5	0
675	7.222	60	CCc1cnc([nH]1)-c1noc(c1-c1ccc2CN(CCO)CCc2c1)-c1cc(C(C)C)c(O)cc1O	0	21	18	11	19	0.9804	15	1	0	16	0	-0.2864	-1.0723	4.50118	2.486	7	0
676	7.222	60	CCNC(=O)c1noc(c1-c1cnc2CCN(C)Cc2c1)-c1cc(C(C)C)c(O)cc1O	0	17	14	9	15	0.8467	15	2	1	13	0	-0.1009	-0.4783	3.40632	2.172	6	1
677	7.222	60	CCNC(=O)c1noc(c1-c1nc2CN(CC(C)C)CCc2n1C)-c1cc(C(C)C)c(O)cc1O	0	15	12	6	15	1.065	11	2	1	11	0	-0.0431	-0.3355	4.53427	2.968	9	1
678	7.222	60	CCNC(=O)c1noc(c1-c1ccc2CN(C)CCc2c1)-c1cc(Br)c(O)cc1O	0	18	15	8	16	0.8282	15	2	1	13	0	-0.2732	1.0288	3.54858	2.245	4	1
679	7.222	60	CCNC(=O)c1noc(c1-c1ccc2CN(C)CCc2c1)-c1cc(Cl)c(O)cc1O	0	18	15	8	18	0.8564	14	2	1	13	0	-0.2688	0.9448	3.43948	2.069	4	1
680	7.222	60	CCNC(=O)c1noc(c1-c1ccc2CN(C)CCc2c1)-c1cc(CC(C)C)c(O)cc1O	0	18	15	8	16	0.7556	16	2	1	13	0	-0.2889	-0.0684	3.98458	4.357	6	1
681	7.222	60	CCCNC(=O)c1noc(c1-c1ccc2CN(C)CCc2c1)-c1cc(C(C)C)c(O)cc1O	0	18	15	8	18	0.7559	14	2	1	13	0	-0.2864	-0.9674	4.29958	4.146	6	1
682	7.222	60	CC(C)NC(=O)c1noc(c1-c1ccc2CN(C)CCc2c1)-c1cc(C(C)C)c(O)cc1O	0	18	15	8	18	0.756	14	2	2	13	0	-0.2864	-0.6901	4.29798	4.248	6	1
683	7.222	60	CC(C)c1cc(-c2onc(C(=O)NCC(F)(F)F)c2-c2ccc3CN(C)CCc3c2)c(O)cc1O	0	18	15	8	16	0.7559	12	2	1	13	0	-0.2864	1.7104	4.52579	3.643	6	1
684	7.222	60	COCCCNC(=O)c1noc(c1-c1ccc2CN(C)CCc2c1)-c1cc(C(C)C)c(O)cc1O	0	18	15	9	17	0.7559	14	2	1	13	0	-0.2864	-1.0589	3.92608	3.533	6	1
685	7.222	60	CC(C)c1cc(-c2onc(C(=O)NCCN(C)C)c2-c2ccc3CN(C)CCc3c2)c(O)cc1O	0	18	15	9	15	0.7559	12	2	1	13	0	-0.2864	-0.5013	3.52509	3.218	6	1
686	7.222	60	CCNC(=O)c1noc(c1-c1ccc2CN(CCF)CCc2c1)-c1cc(C(C)C)c(O)cc1O	0	18	15	8	18	0.7559	14	2	1	13	0	-0.2864	1.354	4.24918	3.269	8	1
687	7.222	60	CCNC(=O)c1noc(c1-c1ccc2CN(CCCOC)CCc2c1)-c1cc(C(C)C)c(O)cc1O	0	18	15	11	18	0.7559	15	2	2	13	0	-0.2864	-0.8085	4.31618	3.956	8	1
688	7.222	60	CCNC(=O)c1noc(c1-c1ccc2CN(CCS(=O)(=O)CC)CCc2c1)-c1cc(C(C)C)c(O)cc1O	0	18	15	8	18	0.7559	14	2	2	13	0	-0.2864	-0.5412	4.79518	3.961	10	1
689	7.222	60	CCCN1CCc2cc(ccc2C1)-c1c(noc1-c1cc(C(C)C)c(O)cc1O)C(=O)NCC	0	18	15	10	18	0.7559	15	2	1	13	0	-0.2864	-0.717	4.68968	4.569	8	1
690	7.222	60	CCNC(=O)c1noc(c1-c1ccc2CN(CCc2c1)C(C)C)-c1cc(C(C)C)c(O)cc1O	0	18	15	8	18	0.7559	14	2	1	13	0	-0.2864	-0.4397	4.68808	4.671	8	1
691	7.222	60	CCNC(=O)c1noc(c1-c1ccc2CN(CC(C)C)CCc2c1)-c1cc(C(C)C)c(O)cc1O	0	18	15	8	18	0.7559	14	2	1	13	0	-0.2864	0.0926	4.93568	4.866	9	1
692	7.222	60	CCNC(=O)c1noc(c1-c1ccc2CN(CCNC(C)=O)CCc2c1)-c1cc(C(C)C)c(O)cc1O	0	18	15	11	18	0.7559	14	2	2	13	0	-0.2864	-1.0936	3.41578	3.288	9	2
693	7.222	60	CCNC(=O)c1noc(c1-c1ccc2CN(CCCNC(C)=O)CCc2c1)-c1cc(C(C)C)c(O)cc1O	0	18	15	9	17	0.7559	15	2	1	13	0	-0.2864	-1.3816	3.80588	3.646	9	2
694	7.222	60	CCNC(=O)c1noc(c1-c1ccc2CN(CC(=O)N(C)C)CCc2c1)-c1cc(C(C)C)c(O)cc1O	0	18	15	10	18	0.7559	15	2	1	13	0	-0.2864	-1.1239	3.36788	3.102	7	2
695	7.222	60	CCNC(=O)c1noc(c1-c1ccc2CN(CCC(=O)N(C)C)CCc2c1)-c1cc(C(C)C)c(O)cc1O	0	18	15	10	18	0.7559	14	2	3	13	0	-0.2864	-0.8757	3.75798	3.26	7	2
696	7.222	60	CCNC(=O)c1noc(c1-c1ccc2CN(CCc2c1)C(=O)CCN(C)C)-c1cc(C(C)C)c(O)cc1O	0	18	15	9	18	0.7559	14	2	3	13	0	-0.2823	-0.8757	3.75798	3.26	7	2
697	7.222	60	CCNC(=O)c1noc(c1-c1ccc2CN(CCc2c1)C(=O)CCN1CCOCC1)-c1cc(C(C)C)c(O)cc1O	0	22	15	8	21	0.7559	15	2	1	13	0	-0.2823	-1.188	3.52858	2.86	11	2
698	7.222	60	CCNC(=O)c1noc(c1-c1ccc2CN(CCc2c1)C(=O)CN(C)C)-c1cc(C(C)C)c(O)cc1O	0	18	15	10	18	0.7559	15	2	1	13	0	-0.2823	-1.1239	3.36788	3.102	7	2
699	7.222	60	CCNC(=O)c1noc(c1-c1ccc2CN(CCc2c1)C(=O)CN1CCOCC1)-c1cc(C(C)C)c(O)cc1O	0	22	15	8	21	0.7559	14	2	1	13	0	-0.2823	-1.4362	3.13848	2.702	11	2
700	5.26	5500	COc1ccc([N+]#[C-])c(Sc2nc3c(N)nccc3n2CCCC#C)c1	0	12	12	4	10	1.1167	6	0	0	11	0	-0.0304	0	3.17118	0	1	0
701	6.26	550	CC(C)(C)CNCCn1c(Sc2cc3OCOc3cc2[N+]#[C-])nc2c(N)nccc12	0	13	12	3	10	1.386	9	0	1	11	0	-0.0178	0	3.03399	0	6	0
702	6.458	348	Oc1cc(O)c(cc1Cl)C(=O)N1CCCC1	0	10	6	7	10	0.4576	8	1	0	0	1	-0.0242	-0.7373	2.30308	1.631	2	1
703	6.267	541	Oc1cc(O)c(cc1Cl)C(=O)N1CCCCC1	0	11	6	6	11	0.4576	9	1	0	0	1	-0.0242	-1.0253	2.69318	1.989	2	1
704	6.417	383	Oc1cc(O)c(cc1Cl)C(=O)N1CCOCC1	0	10	6	7	10	0.4576	9	1	0	0	1	-0.0242	-0.2922	1.53948	0.725	4	1
705	5.253	5590	Oc1cc(O)c(cc1Cl)C(=O)N1CCNCC1	0	10	6	7	10	0.4576	9	1	0	0	1	-0.0242	-0.5585	1.11248	0.529	4	1
706	5.493	3210	CC(=O)N1CCN(CC1)C(=O)c1cc(Cl)c(O)cc1O	0	10	6	6	10	0.4576	10	1	0	0	1	-0.0242	-0.763	1.00079	0.557	5	2
707	5.863	1370	Oc1cc(O)c(cc1Cl)C(=O)N1CCNC(=O)C1	0	10	6	5	9	0.4576	9	1	0	0	1	-0.0242	-0.9979	0.63908	0.087	3	2
708	5.407	3920	Oc1cc(O)c(cc1Cl)C(=O)N1CCC(=O)C1	0	10	6	5	10	0.4576	9	1	0	0	1	-0.0242	-0.6037	1.48208	0.392	2	1
709	6.174	670	Oc1cc(O)c(cc1Cl)C(=O)N1CCC(=C)CC1	0	11	6	5	11	0.4576	9	1	0	0	1	-0.0242	0.8618	2.78547	1.58	2	1
710	7.305	49.5	CC(C)c1cc(C(=O)N2CCN(C)CC2c2ccccc2)c(O)cc1O	0	16	12	8	16	0.3572	15	1	1	0	1	-0.3655	1.1318	2.95429	2.535	5	1
711	5.175	6683	Oc1cc(O)c(cc1Cl)C(=O)NCc1ccccc1	0	12	12	4	10	0.4574	8	1	0	0	1	-0.3534	1.0349	2.65758	2.504	1	1
712	5.835	1461	COc1cc(CN(C)C(=O)c2cc(Cl)c(O)cc2O)cc(OC)c1OC	0	12	12	3	10	0.9921	8	1	0	0	1	-0.07	-0.3586	3.15578	2.304	1	1
713	6.921	120	CN1CCc2c(C1)n(c1CC(C)(C)CC(=O)c21)-c1cc(F)c(C(N)=O)c(N[C@H]2CCOC2)c1	0	21	10	8	15	0.4464	12	2	1	10	0	-0.0308	0.3691	3.09428	2.435	6	1
714	6.921	120	CN1CCc2c(C1)n(c1CC(C)(C)CC(=O)c21)-c1ccc(C(N)=O)c(N[C@H]2CCOC2)c1	0	21	10	8	16	0.2666	12	2	1	10	0	-0.1122	-0.1106	2.95518	2.476	6	1
715	6.959	110	CN1CCc2c(C1)n(c1CC(C)(C)CC(=O)c21)-c1ccc(C(N)=O)c(NC2CCCC2)c1	0	22	10	8	16	0.2665	12	2	1	10	0	-0.1122	-0.8437	4.10888	3.74	4	1
716	6.721	190	CN1CCc2c(C1)n(c1CC(C)(C)CC(=O)c21)-c1ccc(C(N)=O)c(NCC2CC2)c1	0	20	10	8	16	0.2663	12	2	1	10	0	-0.1122	0.5404	3.57628	2.266	5	1
717	6.143	720	COCCNc1cc(ccc1C(N)=O)-n1c2CN(C)CCc2c2c1CC(C)(C)CC2=O	0	17	10	7	16	0.2664	12	2	1	10	0	-0.1122	0.2951	3.46748	1.338	6	1
718	7.046	90	CN1CCc2c(C1)n(c1CC(C)(C)CC(=O)c21)-c1ccc(C(N)=O)c(NC2CCSCC2)c1	0	22	10	8	18	0.2665	12	2	1	10	0	-0.1122	0.3461	4.06188	3.995	6	1
719	6.721	190	CCCNc1cc(ccc1C(N)=O)-n1c2CN(C)CCc2c2c1CC(C)(C)CC2=O	0	17	10	7	16	0.2663	13	2	1	10	0	-0.1122	0.0986	4.23108	2.309	6	1
720	6.377	420	CN1CCc2c(C1)n(c1CC(C)(C)CC(=O)c21)-c1ccc(C(N)=O)c(NC2CC2)c1	0	20	10	7	16	0.2665	12	2	1	10	0	-0.1122	-0.2677	3.32868	3.024	4	1
721	6.658	220	CN1CCc2c(C1)n(c1CC(C)(C)CC(=O)c21)-c1ccc(C(N)=O)c(NCC(F)F)c1	0	17	10	8	15	0.2665	12	2	1	10	0	-0.1122	0.9391	3.43138	2.437	6	1
722	6.347	450	CN1CCc2c(C1)n(c1CC(C)(C)CC(=O)c21)-c1ccc(C(N)=O)c(NCC2(C)COC2)c1	0	20	10	8	12	0.2663	12	2	1	10	0	-0.1122	0.4766	3.20278	1.755	8	1
723	6.854	140	CC(C)Nc1cc(ccc1C(N)=O)-n1c2CN(C)CCc2c2c1CC(C)(C)CC2=O	0	17	10	7	16	0.2665	12	2	1	10	0	-0.1122	0.3759	4.22948	2.411	6	1
724	6.032	930	CN1CCc2c(C1)n(c1CC(C)(C)CC(=O)c21)-c1ccc(C(N)=O)c(NCC(C)(C)C)c1	0	17	10	8	14	0.2663	12	2	1	10	0	-0.1122	1.8915	4.21238	3.001	8	1
725	7.137	73	CC(C)Nc1cc(cc2CCNC(=O)c12)-n1c2CN(C)CCc2c2c1CC(C)(C)CC2=O	0	20	10	7	17	0.2705	12	2	1	10	0	-0.0932	0.4475	4.41648	2.301	7	1
726	6.276	530	CC1(C)Cc2c(c3CCCCc3n2-c2ccc(C(N)=O)c(N[C@H]3CCOC3)c2)C(=O)C1	0	22	10	7	16	0.2525	12	1	1	10	0	-0.1146	-0.7629	4.18558	3.908	4	1
727	6.654	222	CC(C)Cc1cc(cc2CCNC(=O)c12)-n1cc(C)c2c1CC(C)(C)CC2=O	0	17	10	9	16	0.1802	11	1	1	10	0	-0.154	2.1345	4.5195	3.999	6	1
728	7.444	36	Cc1cn(c2CC(C)(C)CC(=O)c12)-c1cc2CCNC(=O)c2c(c1)C1CCCCC1	0	23	10	8	19	0.1805	13	1	2	10	0	-0.151	0.6351	5.3687	6.162	4	1
729	6.71	195	Cc1cn(c2CC(C)(C)CC(=O)c12)-c1cc2CCNC(=O)c2c(c1)C1CCC1	0	21	10	8	17	0.1805	12	1	2	10	0	-0.151	1.1575	4.5885	3.655	4	1
730	6	1000	CCCCc1cc(cc2CCNC(=O)c12)-n1cc(C)c2c1CC(C)(C)CC2=O	0	17	10	8	15	0.1802	12	1	1	10	0	-0.1542	0.7781	4.6636	4.06	5	1
731	5.77	1700	Cc1cn(c2CC(C)(C)CC(=O)c12)-c1cc2CCNC(=O)c2c(c1)C(C)(C)C	0	17	10	9	15	0.1807	12	1	3	10	0	-0.1484	2.7966	4.6185	3.838	7	1
732	6.319	480	Cc1cn(c2CC(C)(C)CC(=O)c12)-c1cc(Cc2ccccc2)c2C(=O)NCCc2c1	0	23	16	7	15	0.1805	11	1	0	11	0	-0.494	2.9044	4.77891	4.002	4	1
733	6.638	230	Cc1cn(c2CC(C)(C)CC(=O)c12)-c1cc2CCNC(=O)c2c(c1)-c1ccccc1	0	23	16	8	17	0.185	13	1	0	13	0	-0.4292	1.294	5.0364	6.625	4	1
734	6.553	280	COc1ccc(cc1)-c1cc(cc2CCNC(=O)c12)-n1cc(C)c2c1CC(C)(C)CC2=O	0	23	16	7	16	0.3051	12	1	0	13	0	-0.2769	1.2422	5.54579	5.126	4	1
735	4.227	59280	CCCN1CCN(CC1)c1ncc2CN(Cc3cc(Br)cs3)CCc2n1	0	15	8	6	8	0.3436	6	1	0	4	0	-0.0464	-0.2076	3.21119	1.739	9	0
736	4.611	24480	Clc1ccc(cc1)C(=O)N1CCc2nc(ncc2C1)N1CCN(CC1)c1ncccn1	0	21	14	4	9	0.6786	7	1	0	8	0	-0.2073	-1.4435	2.37496	0.079	6	1
737	7.538	29	CCNC(=O)c1noc2CCN(Cc12)C(=O)c1cc(C(C)C)c(O)cc1O	0	12	9	6	12	0.718	8	2	2	3	1	-0.0416	-1.1571	1.68928	1.686	6	2
738	7.481	33	CC(C)c1cc(C(=O)N2CCc3onc(C(=O)NCCCCCCC(=O)NO)c3C2)c(O)cc1O	0	12	9	3	7	0.718	4	2	2	3	2	-0.0416	-4.2369	2.19919	1.881	5	3
739	7.469	34	CC(C)c1cc(C(=O)N2CCc3onc(C(=O)NCCCl)c3C2)c(O)cc1O	0	12	9	4	10	0.718	8	2	2	3	1	-0.0416	-0.7423	1.98209	2.028	6	2
740	7.167	68	CC(C)c1cc(C(=O)N2CCc3onc(C(=O)NC4CCCC4)c3C2)c(O)cc1O	0	17	9	4	10	0.718	8	2	3	3	1	-0.0416	-2.7122	2.68589	2.522	4	2
741	7	100	CCOC(=O)c1noc2CCN(Cc12)C(=O)c1cc(C(C)C)c(O)cc1O	0	12	9	7	12	0.742	8	1	2	3	1	-0.0416	-0.6134	2.11628	2.217	6	1
742	6.959	110	CCNC(=O)c1noc2CCN(Cc12)C(=O)c1cc(Cl)c(O)cc1O	0	12	9	7	12	0.8184	8	2	1	3	1	-0.0242	-1.1657	1.21928	1.114	4	2
743	6.796	160	CCOC(=O)c1noc2CCN(Cc12)C(=O)c1cc(Cl)c(O)cc1O	0	12	9	7	11	0.8424	9	1	1	3	1	-0.0242	-0.622	1.64628	1.645	4	1
744	5.921	1200	CCNC(=O)c1noc2CCN(Cc12)C(=O)c1ccc(O)cc1O	0	12	9	6	10	0.7142	9	2	1	3	1	-0.0618	-1.5344	0.56588	0.537	4	2
745	5.854	1400	CCNC(=O)c1noc2CCN(Cc3cc(Cl)c(O)cc3O)Cc12	0	12	9	10	12	0.7356	12	2	1	3	0	-0.032	-0.5061	1.71959	0.926	5	1
746	5.409	3900	CCOC(=O)c1noc2CCN(Cc12)C(=O)c1ccc(O)cc1O	0	12	9	6	10	0.7382	8	1	1	3	1	-0.0618	-0.9907	0.99288	1.068	4	1
747	7.824	15	CCNC(=O)c1nnn(c1-c1ccc(CNCCN2CCOCC2)cc1)-c1cc(C(C)C)c(O)cc1O	0	18	14	9	16	0.6877	13	3	3	14	0	-0.2781	-1.0967	2.72398	2.269	11	1
748	7.824	15	CCNC(=O)c1nnn(c1-c1ccc(CNCCN(CC)CC)cc1)-c1cc(C(C)C)c(O)cc1O	0	14	14	9	14	0.6877	11	3	3	14	0	-0.2781	0.7545	3.73358	2.243	11	1
749	7.921	12	CCNC(=O)c1nnn(c1-c1ccc(CNCCCN(CC)CC)cc1)-c1cc(C(C)C)c(O)cc1O	0	14	14	9	14	0.6877	13	3	3	14	0	-0.2781	-0.5716	4.12368	3.873	11	1
750	7.495	32	CCNC(=O)c1nnn(c1-c1ccc(CNC2CCN(C)CC2)cc1)-c1cc(C(C)C)c(O)cc1O	0	19	14	9	14	0.6877	10	3	4	14	0	-0.2781	-1.5131	3.48598	3.212	7	1
751	7.77	17	CC(C)c1cc(c(O)cc1O)-n1nnc(C(=O)NCCCl)c1-c1ccc(CN2CCOCC2)cc1	0	18	14	8	14	0.6877	10	3	3	14	0	-0.2779	0.7534	3.35328	1.725	9	1
752	7.481	33	CCCCCCCNC(=O)c1nnn(c1-c1ccc(CN2CCOCC2)cc1)-c1cc(C(C)C)c(O)cc1O	0	18	14	8	13	0.6877	11	3	3	14	0	-0.2779	-2.4293	5.08488	5.289	9	1
753	7.569	27	CC(C)c1cc(c(O)cc1O)-n1nnc(C(=O)NC2CCCC2)c1-c1ccc(CN2CCOCC2)cc1	0	23	14	8	20	0.6877	15	3	4	14	0	-0.2779	-2.2546	4.05708	3.491	7	1
754	6.569	270	CC(C)c1cc(c(O)cc1O)-n1nnc(C(=O)N2CCOCC2)c1-c1ccc(CN2CCOCC2)cc1	0	22	14	8	13	0.6879	10	3	2	14	0	-0.2779	-1.1599	2.85708	1.974	11	1
755	7.509	31	CC(C)c1cc(c(O)cc1O)-n1nnc(C(=O)NCCCCCCC(=O)NO)c1-c1ccc(CN2CCOCC2)cc1	0	18	14	7	15	0.6877	11	3	3	14	1	-0.2779	-3.2529	3.57038	2.767	8	2
756	6.495	320	CC(C)c1cc(c(O)cc1O)-n1cc(nn1)-c1ccc(CN2CCN(CC2)c2ccccc2)cc1	0	24	20	5	10	0.6077	8	2	2	14	0	-0.541	1.6704	5.05129	3.203	7	0
757	6.53	295	CC(C)c1cc(c(O)cc1O)-n1cc(nn1)-c1ccc(CN2CCN(Cc3ccccc3)CC2)cc1	0	24	20	6	10	0.578	8	3	2	14	0	-0.6107	1.9332	4.1803	2.677	8	0
758	7.444	36	CC(C)c1cc(c(O)cc1O)-n1nncc1-c1ccc(CN2CCN(CC2)c2ccccc2)cc1	0	24	20	5	18	0.6067	10	2	2	14	0	-0.5409	1.1153	5.45648	2.892	7	0
759	7.569	27	CC(C)c1cc(c(O)cc1O)-n1nncc1-c1ccc(CN2CCN(Cc3ccccc3)CC2)cc1	0	24	20	5	16	0.577	10	3	2	14	0	-0.6106	1.3781	4.58549	2.366	8	0
760	7.456	35	CC(C)c1cc(c(O)cc1O)-n1nncc1-c1ccc(CN2CCOCC2)cc1	0	18	14	7	15	0.577	12	2	2	14	0	-0.2779	-0.0086	3.43939	1.231	7	0
761	7.432	37	CC(C)c1cc(c(O)cc1O)-n1nncc1-c1ccc(CN2CCCC(O)C2)cc1	0	19	14	7	16	0.577	12	2	2	14	0	-0.2779	-0.9644	3.56389	1.465	5	0
762	7.638	23	CCNC(=O)c1nnn(c1-c1ccc(CN2CCCC(O)C2)cc1)-c1cc(C(C)C)c(O)cc1O	0	19	14	10	15	0.6877	13	3	3	14	0	-0.2779	-1.6553	3.25888	2.889	7	1
763	7.523	30	CCNC(=O)c1nnn(c1-c1ccc(CN2CCC[C@@H](O)C2)cc1)-c1cc(C(C)C)c(O)cc1O	0	19	14	9	15	0.6877	12	3	3	14	0	-0.2779	-1.6553	3.25888	2.889	7	1
764	7.638	23	CCNC(=O)c1nnn(c1-c1ccc(CN2CCC[C@H](O)C2)cc1)-c1cc(C(C)C)c(O)cc1O	0	19	14	10	15	0.6877	12	3	3	14	0	-0.2779	-1.6553	3.25888	2.889	7	1
765	7.678	21	CCNC(=O)c1nnn(c1-c1ccc(CN2CCCCC2)cc1)-c1cc(C(C)C)c(O)cc1O	0	19	14	7	15	0.6877	12	3	3	14	0	-0.2779	-1.4326	4.28808	3.919	7	1
766	7.638	23	CCNC(=O)c1nnn(c1-c1ccc(Cn2ccnc2)cc1)-c1cc(C(C)C)c(O)cc1O	0	17	17	8	15	0.8537	13	2	3	17	0	-0.2713	-1.2417	3.69888	1.986	5	1
767	8	10	CCNC(=O)c1nnn(c1-c1ccc(CN2CCCCC2CCO)cc1)-c1cc(C(C)C)c(O)cc1O	0	19	14	10	15	0.6877	13	3	3	14	0	-0.2779	-2.2313	4.03908	3.605	7	1
768	7.602	25	CCNC(=O)c1nnn(c1-c1ccc(CN(CC)CC)cc1)-c1cc(C(C)C)c(O)cc1O	0	14	14	8	14	0.6877	13	3	3	14	0	-0.2779	0.1136	4.14398	3.901	9	1
769	7.886	13	CCNC(=O)c1nnn(c1-c1ccc(CN2CC[C@@H](C2)N(C)C)cc1)-c1cc(C(C)C)c(O)cc1O	0	18	14	8	16	0.6877	13	3	3	14	0	-0.2779	-0.6892	3.43808	3.093	7	1
770	8.167	6.8	CCNC(=O)c1nnn(c1-c1ccc(CNC2CCCCC2)cc1)-c1cc(C(C)C)c(O)cc1O	0	20	14	9	14	0.6877	13	3	3	14	0	-0.2781	-2.5158	4.72448	4.644	5	1
771	4.469	34000	Oc1cc(O)c2C[C@@H](OC(=O)c3cc(O)c(O)c(O)c3)[C@@H](Oc2c1)c1cc(O)c(O)c(O)c1	0	21	18	8	17	1.587	12	0	0	0	0	-0.0236	-1.6118	3.13407	2.984	0	0
772	4.387	41000	Oc1cc(O)c2C[C@@H](OC(=O)c3ccc(F)cc3)[C@H](Oc2c1)c1cc(O)c(O)c(O)c1	0	21	18	7	18	1.1773	13	0	0	0	0	-0.1606	-0.0127	4.15637	2.485	0	0
773	4.237	58000	Oc1cc(O)c2C[C@@H](OC(=O)c3ccc(F)c(F)c3)[C@H](Oc2c1)c1cc(O)c(O)c(O)c1	0	21	18	7	18	1.3742	13	0	0	0	0	-0.0963	-0.1029	4.29547	2.601	0	0
774	4.187	65000	Oc1cc(O)c2C[C@@H](OC(=O)[C@@H]3CC[C@H](F)CC3)[C@H](Oc2c1)c1ccc(O)c(O)c1	0	21	12	5	17	0.7829	11	0	0	0	0	-0.0773	-0.3474	4.52617	3.016	0	0
775	4.161	69000	Oc1cc(O)c2C[C@@H](OC(=O)[C@H]3CC[C@H](F)CC3)[C@H](Oc2c1)c1ccc(O)c(O)c1	0	21	12	6	17	0.7829	12	0	0	0	0	-0.0773	-0.3474	4.52617	3.016	0	0
776	4.201	63000	Oc1cc(O)c2C[C@@H](OC(=O)c3ccccc3)[C@H](Oc2c1)c1ccccc1	0	21	18	9	19	0.5251	12	0	0	0	0	-0.5776	1.7668	4.90047	3.02	0	0
777	4.456	35000	Oc1cc(cc(O)c1O)C(=O)O[C@@H]1Cc2ccccc2O[C@@H]1c1ccccc1	0	21	18	6	16	0.7171	11	0	0	0	0	-0.4992	1.2037	3.73469	3.375	0	0
778	3.921	120000	Oc1cc(O)c2C[C@H](OC(=O)c3ccccc3)[C@H](Oc2c1)c1ccccc1	0	21	18	7	16	0.5251	9	0	0	0	0	-0.5776	1.7668	4.90047	3.02	0	0
779	6.201	630	CN1CCN(CC1)C(=O)c1cc(c(O)cc1O)-n1ccc2ccccc12	0	18	14	6	13	0.5355	9	1	0	14	1	-0.2655	-0.1171	2.80398	1.787	4	1
780	6.886	130	Oc1cc(O)c(cc1C(=O)N1CCc2ccccc2C1)-n1ccc2ccccc12	0	23	20	4	14	0.5355	8	1	0	14	1	-0.5715	1.012	5.01656	3.037	2	1
781	6.481	330	Oc1cc(O)c(cc1C(=O)N1CCc2sccc2C1)-n1ccc2ccccc12	0	21	18	4	12	0.5355	8	1	0	14	1	-0.3631	-0.181	5.07806	2.717	2	1
782	6.886	130	Oc1cc(O)c(cc1C(=O)N1Cc2ccccc2C1)-n1ccc2ncccc12	0	21	19	6	12	0.6725	7	1	0	13	1	-0.3995	-0.2384	4.32235	2.447	2	1
783	6.602	250	Oc1cc(O)c(cc1C(=O)N1Cc2ccccc2C1)-n1ccc2cnccc12	0	21	19	6	12	0.6226	8	1	0	13	1	-0.3595	-0.9566	3.99903	2.041	2	1
784	5.824	1500	COc1ccc2n(cc(CCN)c2c1)-c1cc(C(=O)N2Cc3ccccc3C2)c(O)cc1O	0	22	20	7	19	0.6667	13	1	0	14	1	-0.3886	-0.4205	3.90397	1.932	3	1
785	7.155	70	Oc1cc(O)c(cc1C(=O)N1Cc2ccccc2C1)-n1ccc2c(Br)cccc12	0	22	20	7	13	0.5774	9	1	0	14	1	-0.4838	1.2091	5.39706	3.21	2	1
786	6.886	130	COC(=O)c1cccc2n(ccc12)-c1cc(C(=O)N2Cc3ccccc3C2)c(O)cc1O	0	22	20	6	18	0.6183	11	1	0	14	1	-0.4844	0.572	3.67998	2.311	2	1
787	6.208	620	CNC(=O)c1cccc2n(ccc12)-c1cc(C(=O)N2Cc3ccccc3C2)c(O)cc1O	0	22	20	7	19	0.5941	12	2	0	14	1	-0.4863	0.0283	3.19827	1.78	2	2
788	7.108	78	Oc1cc(O)c(cc1C(=O)N1Cc2ccccc2C1)-n1ccc2cc(Br)ccc12	0	22	20	5	14	0.5551	10	1	0	14	1	-0.4624	1.2091	5.39706	3.21	2	1
789	7.42	38	Cc1ccc2n(ccc2c1)-c1cc(C(=O)N2Cc3ccccc3C2)c(O)cc1O	0	22	20	6	19	0.5357	10	1	1	14	1	-0.5352	1.2028	3.9214	3.06	3	1
790	6.721	190	Oc1cc(O)c(cc1Nc1ccc(Cl)cc1Cl)C(=O)N1Cc2ccccc2C1	0	20	18	7	17	0.6082	14	1	0	0	1	-0.4109	1.309	5.54117	3.311	2	1
791	7.276	53	COc1ccc(cc1)-c1c(NC(=O)C2CC2)onc1-c1cc(Cl)c(O)cc1O	0	18	15	7	14	0.9726	12	0	1	14	1	-0.177	0.913	5.05247	2.491	0	1
792	7.056	88	COc1ccc(cc1)-c1c(NC(=O)C2CCC2)onc1-c1cc(Cl)c(O)cc1O	0	19	15	8	14	0.9726	10	0	1	14	1	-0.177	0.625	5.44257	3.06	0	1
793	6.745	180	COc1ccc(cc1)-c1c(NC(=O)C2CCCCC2)onc1-c1cc(Cl)c(O)cc1O	0	21	15	7	14	0.9726	10	0	1	14	1	-0.177	0.049	6.22277	4.198	0	1
794	7.357	44	COc1ccc(cc1)-c1c(NC(C)=O)onc1-c1cc(Br)c(O)cc1O	0	15	15	8	14	0.9447	12	0	1	14	1	-0.1814	0.6404	4.77147	2.461	1	1
795	6.854	140	COc1ccc(cc1)-c1c(NC(C)=O)onc1-c1ccc(O)cc1O	0	15	15	7	14	0.8684	12	0	1	14	1	-0.2148	0.1877	4.00897	1.708	1	1
796	7.377	42	CCc1cc(-c2noc(NC(C)=O)c2-c2ccc(OC)cc2)c(O)cc1O	0	15	15	8	14	0.872	13	0	2	14	1	-0.1977	0.299	3.66539	2.353	2	1
797	6.523	300	COc1ccc(cc1)-c1c(NC(C)=O)onc1-c1cc(c(O)cc1O)C(C)(C)C	0	15	15	7	14	0.8728	12	0	2	14	1	-0.1918	1.5483	5.67706	3.269	4	1
798	7.638	23	COc1ccc(cc1)-c1c(NC(=O)C2CC2)onc1-c1cc(C(C)C)c(O)cc1O	0	18	15	8	14	0.8723	12	0	2	14	1	-0.1945	0.9216	5.52247	3.063	2	1
799	7.569	27	CC(C)c1cc(-c2noc(NC(=O)C3CC3)c2-c2ccc(CN3CCOCC3)cc2)c(O)cc1O	0	22	15	7	15	0.7522	11	1	2	14	1	-0.3092	-0.853	4.10059	3.665	7	1
800	7.77	17	CC(C)c1cc(-c2noc(NC(=O)C3CC3)c2-c2ccc(CN3CCCCC3)cc2)c(O)cc1O	0	23	15	7	17	0.7522	11	1	2	14	1	-0.3092	-1.5861	5.25429	4.929	5	1
801	7.678	21	CCN(CC)Cc1ccc(cc1)-c1c(NC(=O)C2CC2)onc1-c1cc(C(C)C)c(O)cc1O	0	18	15	8	14	0.7522	12	1	2	14	1	-0.3092	-0.0399	5.51538	4.911	7	1
802	7.569	27	CC(C)c1cc(-c2noc(NC(=O)C3CC3)c2-c2ccc(CN3CCN(C)CC3)cc2)c(O)cc1O	0	22	15	7	17	0.7522	11	1	2	14	1	-0.3092	-0.5834	4.01579	3.708	7	1
803	7.444	36	CC(C)c1cc(-c2noc(NC(=O)C3CC3)c2-c2ccc(CN3CCc4ccccc4C3)cc2)c(O)cc1O	0	27	21	6	13	0.7522	10	1	2	14	1	-0.6193	-0.4665	5.48719	6.81	5	1
804	7.538	29	CC(C)c1cc(-c2noc(NC(=O)C3CC3)c2-c2ccc(CN3CC(C)OC(C)C3)cc2)c(O)cc1O	0	22	15	7	15	0.7522	11	1	2	14	1	-0.3092	-0.8744	4.87759	4.585	7	1
805	7.337	46	CC(C)c1cc(-c2noc(NC(=O)C3CC3)c2-c2ccc(CN3CC(C)CC(C)C3)cc2)c(O)cc1O	0	23	15	7	16	0.7522	11	1	2	14	1	-0.3092	-0.3929	5.74629	5.523	7	1
806	7.456	35	CC(C)c1cc(-c2noc(NC(=O)C3CC3)c2-c2ccc(CN3CCCCC3C)cc2)c(O)cc1O	0	23	15	7	17	0.7522	11	1	2	14	1	-0.3092	-1.5968	5.64279	5.389	5	1
807	7.155	70	CC(C)c1cc(-c2noc(NC(=O)C3CC3)c2-c2ccc(CN3CCC(CC3)N(C)C)cc2)c(O)cc1O	0	23	15	7	17	0.7522	11	1	4	14	1	-0.3092	-1.1307	4.79439	4.461	5	1
808	7.26	55	CC(C)c1cc(-c2noc(NC(=O)C3CC3)c2-c2ccc(CN(C)CCN(C)C)cc2)c(O)cc1O	0	18	15	8	14	0.7522	12	1	2	14	1	-0.3092	-0.402	4.26179	3.918	5	1
809	7.237	58	CC(C)c1cc(-c2noc(NC(=O)C3CC3)c2-c2ccc(CN(C)C3CCCCC3)cc2)c(O)cc1O	0	24	15	7	16	0.7522	11	1	2	14	1	-0.3092	-2.1334	6.03289	5.893	3	1
810	7.357	44	CC(C)c1cc(-c2noc(NC(=O)C3CC3)c2-c2ccc(CN3CCC(CC3)N3CCCC3)cc2)c(O)cc1O	0	27	15	6	18	0.7522	13	1	2	14	1	-0.3092	-1.8881	5.32859	4.967	7	1
811	7.523	30	CC(C)c1cc(-c2noc(NC(=O)C3CC3)c2-c2ccc(CN3CCC(CC3)N3CCOCC3)cc2)c(O)cc1O	0	27	15	5	18	0.7522	14	1	2	14	1	-0.3092	-1.443	4.56499	4.061	9	1
812	7.222	60	CCCC(=O)Nc1onc(c1-c1ccc(OC)cc1)-c1cc(Cl)c(O)cc1O	0	15	15	8	14	0.9726	11	0	1	14	1	-0.177	0.3446	4.94178	3.107	1	1
813	7.432	37	CCC(=O)Nc1onc(c1-c1ccc(OC)cc1)-c1cc(Cl)c(O)cc1O	0	15	15	8	14	0.9726	13	0	1	14	1	-0.177	0.6326	4.55168	2.538	1	1
814	7.155	70	COc1ccc(cc1)-c1c(NC(C)=O)onc1-c1cc(Cl)c(O)cc1O	0	15	15	8	14	0.9726	11	0	1	14	1	-0.177	0.5564	4.66237	2.285	1	1
815	7.244	57	CC(C)c1cc(-c2noc(NC(=O)C3CC3)c2-c2ccc(CN3CCSCC3)cc2)c(O)cc1O	0	22	15	7	16	0.7522	11	1	2	14	1	-0.3092	-0.1083	4.81719	4.826	7	1
816	7.456	35	CC(C)N(Cc1ccc(cc1)-c1c(NC(=O)C2CC2)onc1-c1cc(C(C)C)c(O)cc1O)C(C)C	0	18	15	8	12	0.7522	10	1	2	14	1	-0.3092	1.3538	6.29238	4.717	7	1
817	6.854	140	CC(C)c1cc(-c2noc(NC(=O)C3CC3)c2-c2ccc(CN(C)CCc3ccccc3)cc2)c(O)cc1O	0	24	21	8	16	0.7522	12	1	2	14	1	-0.6571	2.8267	5.94289	4.623	4	1
818	6.854	140	COc1ncc(s1)-c1cc(F)ccc1[C@H]1Cc2nc(N)nc(C)c2C(=O)N1	0	16	13	7	13	0.8781	11	1	0	12	0	-0.1179	-0.159	3.40369	-0.91	1	1
819	4.523	30000	COc1cc(Cl)c(Cc2nc3c(N)nc(F)nc3n2CCCC#C)cc1OC	0	11	11	4	10	1.2704	9	0	0	10	0	-0.0294	0.3478	4.42556	1.857	1	0
820	5.708	1960	Nc1ncnc2n(CCCC#C)c(Sc3ccc(Cl)c(Cl)c3)nc12	0	11	11	4	9	0.8947	8	0	0	10	0	-0.1154	1.7506	5.71125	1.909	1	0
821	4.604	24900	Nc1ncnc2n(CCCC#C)c(nc12)[S+]([O-])c1ccc(Cl)cc1Cl	0	11	11	2	8	1.2451	6	0	0	10	0	-0.0622	0.6997	5.45225	1.187	1	0
822	6.187	650	Nc1nc(Cl)c2c(Cc3ccccc3)cn(Cc3cc4OCOc4cc3Br)c2n1	1	19	18	7	14	0.938	11	0	0	15	0	-0.3799	2.1016	6.49098	3.547	1	0
823	6.125	750	Nc1nc(Cl)c2c(Cc3ccccc3)cn(Cc3cc4OCOc4cc3I)c2n1	1	19	18	6	14	0.9334	9	0	0	15	0	-0.3816	1.9314	6.33308	3.817	1	0
824	7.319	48	COc1c(C)cnc(Cn2cc(Cc3ccc(Cl)cc3)c3c(Cl)nc(N)nc23)c1C	1	17	17	5	10	0.8735	8	0	1	14	0	-0.2563	1.8059	5.77695	2.095	3	0
825	7.027	94	COc1ccc(Cc2cn(Cc3ncc(C)c(OC)c3C)c3nc(N)nc(Cl)c23)cc1	1	17	17	5	14	0.9526	10	0	1	14	0	-0.2052	1.8527	5.63294	2.127	3	0
826	6.318	481	Oc1cc(O)c(cc1Cl)C(=O)N1CCN(CC1)c1ccccc1	0	16	12	6	12	0.4874	8	1	0	0	1	-0.2872	0.8317	3.55657	2.386	4	1
827	5.854	1400	Nc1ncnc2n(CCCCC#C)c(Sc3cc4OCOc4cc3Br)nc12	0	12	11	5	9	1.1615	9	0	0	10	0	-0.0023	-0.0184	5.78654	2.484	1	0
828	6.31	490	Nc1ncnc2n(CCCc3cn(CCCO)nn3)c(Sc3cc4OCOc4cc3Br)nc12	0	14	13	7	11	1.293	9	1	0	12	0	-0.0023	-1.6177	4.91534	0.896	3	0
829	6.292	510	Nc1ncnc2n(CCCCc3cn(CCCO)nn3)c(Sc3cc4OCOc4cc3Br)nc12	0	14	13	7	11	1.2929	9	1	0	12	0	-0.0023	-1.9057	5.30544	1.254	3	0
830	5.907	1240	CC1CCc2c(C)c3c(CC(C)(C)CC3=O)n2-c2ccc(C(N)=O)c(NCCN1)c2	0	14	10	7	13	0.2518	11	1	2	10	0	-0.1177	0.1427	3.4702	2.435	6	1
831	7.046	90	C[C@@H]1CCc2c(C)c3c(CC(C)(C)CC3=O)n2-c2ccc(C(N)=O)c(NC[C@@H](C)N1)c2	0	14	10	6	13	0.2518	11	1	2	10	0	-0.1177	0.167	3.8587	3.943	6	1
832	6.367	430	C[C@H]1CCc2c(C)c3c(CC(C)(C)CC3=O)n2-c2ccc(C(N)=O)c(NC[C@@H](C)N1)c2	0	14	10	6	13	0.2518	11	1	2	10	0	-0.1177	0.167	3.8587	3.943	6	1
833	6.824	150	C[C@H]1CN(C)CCCc2c(C)c3c(CC(C)(C)CC3=O)n2-c2ccc(C(N)=O)c(N1)c2	0	14	10	8	14	0.252	12	1	1	10	0	-0.1177	0.6786	3.8124	2.674	6	1
834	6.959	110	C[C@H]1CCN(CCc2c(C)c3c(CC(C)(C)CC3=O)n2-c2ccc(C(N)=O)c(N1)c2)C(C)=O	0	14	10	8	14	0.2533	12	1	2	10	0	-0.1177	-0.6054	3.7291	2.463	7	2
835	6.398	400	Cc1c2CCNCCCNc3cc(ccc3C(N)=O)-n2c2CC(C)(C)CC(=O)c12	0	14	10	7	13	0.2528	11	1	2	10	0	-0.1177	-0.3902	3.68179	1.975	6	1
836	6.538	290	Cc1c2CCCNCC(C)(C)CNc3cc(ccc3C(N)=O)-n2c2CC(C)(C)CC(=O)c12	0	14	10	9	14	0.2517	13	1	1	10	0	-0.1177	1.1026	4.70799	4.073	8	1
837	6.854	140	Cc1c2CCCNC(C)(C)CNc3cc(ccc3C(N)=O)-n2c2CC(C)(C)CC(=O)c12	0	14	10	7	14	0.2518	11	1	1	10	0	-0.1177	0.7709	4.46039	3.9	7	1
838	6.036	920	Cc1c2CCCNCCNc3cc(ccc3C(N)=O)-n2c2CC(C)(C)CC(=O)c12	0	14	10	11	14	0.2518	13	1	1	10	0	-0.1177	0.1534	3.68179	1.975	6	1
839	6.081	830	Cc1c2CCCNCC(C)(C)Nc3cc(ccc3C(N)=O)-n2c2CC(C)(C)CC(=O)c12	0	14	10	7	14	0.2522	11	1	1	10	0	-0.1177	0.7709	4.46039	3.9	7	1
840	6.444	360	CC1CNCCc2c(C)c3c(CC(C)(C)CC3=O)n2-c2ccc(C(N)=O)c(NC1)c2	0	14	10	7	13	0.2528	11	1	2	10	0	-0.1177	0.0312	3.3277	2.272	7	1
841	6.495	320	Cc1c2CCNCC(O)CNc3cc(ccc3C(N)=O)-n2c2CC(C)(C)CC(=O)c12	0	14	10	8	14	0.2529	11	1	2	10	0	-0.1177	-0.5779	2.65259	2.851	6	1
842	6.244	570	Cc1c2CCNCCOCCNc3cc(ccc3C(N)=O)-n2c2CC(C)(C)CC(=O)c12	0	14	10	7	14	0.2529	11	1	2	10	0	-0.1177	-0.2331	3.30829	1.427	8	1
843	6.9	126	Cc1c2CCCN3CCCC[C@@H]3CNc3cc(ccc3C(N)=O)-n2c2CC(C)(C)CC(=O)c12	0	19	10	7	15	0.2518	13	1	0	10	0	-0.1177	-0.3274	4.94669	3.115	6	1
844	5.478	3324	Cc1c2CCCN3CCNC[C@H]3CNc3cc(ccc3C(N)=O)-n2c2CC(C)(C)CC(=O)c12	0	18	10	8	18	0.22	13	1	0	10	0	-0.1221	0.1394	3.36599	1.655	8	1
845	6.697	201	Cc1c2CCCN3CC[C@@H](C3)CNc3cc(ccc3C(N)=O)-n2c2CC(C)(C)CC(=O)c12	0	18	10	6	17	0.2517	11	1	0	10	0	-0.1177	0.0045	4.41409	2.594	7	1
846	6.815	153	Cc1c2CCCN3C[C@H](O)C[C@@H]3CNc3cc(ccc3C(N)=O)-n2c2CC(C)(C)CC(=O)c12	0	18	10	8	16	0.2518	13	1	0	10	0	-0.1177	-0.2621	3.52739	1.727	6	1
847	6.198	634	CC(=O)N[C@H]1C[C@@H]2CNc3cc(ccc3C(N)=O)-n3c4CC(C)(C)CC(=O)c4c(C)c3CCCN2C1	0	18	10	6	15	0.2518	10	1	1	10	0	-0.1177	-0.3917	3.67119	2.984	7	2
848	6.305	496	Cc1c2CCCN3C[C@H](C[C@@H]3CNc3cc(ccc3C(N)=O)-n2c2CC(C)(C)CC(=O)c12)N1CCCC1	0	22	10	5	15	0.2518	10	1	0	10	0	-0.1177	-0.3414	4.63089	2.795	8	1
849	6.054	883	Cc1c2CCN3CCC[C@@H]3CNc3cc(ccc3C(N)=O)-n2c2CC(C)(C)CC(=O)c12	0	18	10	9	18	0.2529	15	1	0	10	0	-0.1177	-0.295	4.16649	2.399	6	1
850	6.521	301	Cc1c2CCCCN3CCC[C@@H]3CNc3cc(ccc3C(N)=O)-n2c2CC(C)(C)CC(=O)c12	0	18	10	8	17	0.2517	12	1	0	10	0	-0.1177	-0.3274	4.94669	3.115	6	1
851	6.726	188	Cc1c2CCC(=O)N3CCC[C@@H]3CNc3cc(ccc3C(N)=O)-n2c2CC(C)(C)CC(=O)c12	0	18	10	9	17	0.2522	14	1	0	10	0	-0.1177	-0.3412	4.08319	3.066	5	2
852	6.008	982	Cc1c2CCCN3CC[C@@H](C3)Nc3cc(ccc3C(N)=O)-n2c2CC(C)(C)CC(=O)c12	0	18	10	7	18	0.252	15	1	0	10	0	-0.1177	0.2486	4.16649	2.399	6	1
853	7.194	64	C[C@@H]1CNCCc2c(C)c3c(CC(C)(C)CC3=O)n2-c2ccc(C(N)=O)c(N[C@H]1C)c2	0	14	10	9	14	0.253	12	1	2	10	0	-0.1177	0.0555	3.7162	3.78	7	1
854	6.936	116	C[C@@H]1Nc2cc(ccc2C(N)=O)-n2c3CC(C)(C)CC(=O)c3c(C)c2CCCN(C)[C@H]1C	0	14	10	7	12	0.252	11	1	1	10	0	-0.1177	0.6679	4.80099	3.134	6	1
855	7.056	88	C[C@@H]1CN(C)CCc2c(C)c3c(CC(C)(C)CC3=O)n2-c2ccc(C(N)=O)c(N[C@H]1C)c2	0	14	10	7	14	0.253	10	1	3	10	0	-0.1177	0.5564	4.0584	2.971	7	1
856	6.848	142	C[C@@H]1Nc2cc(ccc2C(N)=O)-n2c3CC(C)(C)CC(=O)c3c(C)c2CCCN(CCO)[C@H]1C	0	14	10	8	11	0.252	11	1	1	10	0	-0.1177	0.1635	4.16349	3.473	8	1
857	7.076	84	C[C@@H]1CN(CCO)CCc2c(C)c3c(CC(C)(C)CC3=O)n2-c2ccc(C(N)=O)c(N[C@H]1C)c2	0	14	10	6	13	0.253	9	1	3	10	0	-0.1177	0.052	3.4209	3.31	9	1
858	7.071	85	C[C@@H]1Nc2cc(ccc2C(N)=O)-n2c3CC(C)(C)CC(=O)c3c(C)c2CCCN([C@H]1C)C(C)=O	0	14	10	8	11	0.252	11	1	1	10	0	-0.1177	-0.0725	4.71769	2.923	7	2
859	7.237	58	C[C@@H]1CN(CCc2c(C)c3c(CC(C)(C)CC3=O)n2-c2ccc(C(N)=O)c(N[C@H]1C)c2)C(C)=O	0	14	10	6	14	0.2533	11	1	2	10	0	-0.1177	-0.184	3.9751	2.76	8	2
860	7.131	74	C[C@@H]1CN(CCc2c(C)c3c(CC(C)(C)CC3=O)n2-c2ccc(C(N)=O)c(N[C@H]1C)c2)C(=O)CN	0	14	10	5	14	0.2533	11	1	2	10	0	-0.1177	-1.1106	2.9139	2.704	8	2
861	7.114	77	C[C@@H]1Nc2cc(ccc2C(N)=O)-n2c3CC(C)(C)CC(=O)c3c(C)c2CCCN([C@H]1C)C(=O)CO	0	14	10	7	11	0.252	11	1	1	10	1	-0.1177	-0.7445	3.69009	1.886	7	2
862	7.18	66	C[C@@H]1CN(CCc2c(C)c3c(CC(C)(C)CC3=O)n2-c2ccc(C(N)=O)c(N[C@H]1C)c2)C(=O)CO	0	14	10	7	14	0.2533	12	1	2	10	1	-0.1177	-0.821	2.9475	2.771	8	2
863	6.883	131	COCCC(=O)N1CCCc2c(C)c3c(CC(C)(C)CC3=O)n2-c2ccc(C(N)=O)c(N[C@@H](C)[C@@H]1C)c2	0	14	10	5	11	0.252	10	1	1	10	0	-0.1177	-0.0878	4.1342	2.563	7	2
864	7.081	83	COCCC(=O)N1CCc2c(C)c3c(CC(C)(C)CC3=O)n2-c2ccc(C(N)=O)c(N[C@@H](C)[C@H](C)C1)c2	0	14	10	6	14	0.2533	9	1	2	10	0	-0.1177	-0.1643	3.9917	3.448	8	2
865	7.081	83	C[C@H](N)C(=O)N1CCc2c(C)c3c(CC(C)(C)CC3=O)n2-c2ccc(C(N)=O)c(N[C@@H](C)[C@H](C)C1)c2	0	14	10	6	11	0.2533	11	1	2	10	0	-0.1177	-1.0496	3.3024	2.182	8	2
866	7.187	65	CC[C@H](N)C(=O)N1CCc2c(C)c3c(CC(C)(C)CC3=O)n2-c2ccc(C(N)=O)c(N[C@@H](C)[C@H](C)C1)c2	0	14	10	5	13	0.2533	11	1	2	10	0	-0.1177	-1.3026	3.6925	3.588	8	2
867	7.155	70	CC(C)[C@H](N)C(=O)N1CCc2c(C)c3c(CC(C)(C)CC3=O)n2-c2ccc(C(N)=O)c(N[C@@H](C)[C@H](C)C1)c2	0	14	10	5	13	0.2533	11	1	2	10	0	-0.1177	-0.493	3.9385	3.885	9	2
868	7.222	60	C[C@@H]1CN(CCc2c(C)c3c(CC(C)(C)CC3=O)n2-c2ccc(C(N)=O)c(N[C@H]1C)c2)C(=O)C(C)(C)N	0	14	10	5	14	0.2533	11	1	2	10	0	-0.1177	-0.3497	3.6925	2.292	9	2
869	6.936	116	C[C@@H]1CN(CCc2c(C)c3c(CC(C)(C)CC3=O)n2-c2ccc(C(N)=O)c(N[C@H]1C)c2)C(=O)C1(N)CC1	0	17	10	6	17	0.2533	13	1	2	10	0	-0.1177	-0.6825	3.4465	3	7	2
870	7.081	83	C[C@@H]1CN(CCc2c(C)c3c(CC(C)(C)CC3=O)n2-c2ccc(C(N)=O)c(N[C@H]1C)c2)C(=O)C1(N)CCCC1	0	19	10	8	19	0.2533	14	1	2	10	0	-0.1177	-1.2585	4.2267	3.716	7	2
871	7.167	68	C[C@@H]1CN(CCc2c(C)c3c(CC(C)(C)CC3=O)n2-c2ccc(C(N)=O)c(N[C@H]1C)c2)C(=O)[C@@H]1CCCN1	0	18	10	7	18	0.2533	15	1	2	10	0	-0.1177	-1.3008	3.7072	3.703	8	2
872	6.642	228	C[C@@H]1CN(CCc2c(C)c3c(CC(C)(C)CC3=O)n2-c2ccc(C(N)=O)c(N[C@H]1C)c2)C(=O)[C@H]1CCCN1	0	18	10	8	18	0.2533	12	1	2	10	0	-0.1177	-1.3008	3.7072	3.703	8	2
873	7.097	80	C[C@@H]1CN(CCc2c(C)c3c(CC(C)(C)CC3=O)n2-c2ccc(C(N)=O)c(N[C@H]1C)c2)C(=O)[C@@H]1C[C@H](F)CN1	0	18	10	7	18	0.2533	13	1	2	10	0	-0.1177	-0.5835	3.6552	3.847	8	2
874	6.738	183	C[C@H](O)C(=O)N1CCc2c(C)c3c(CC(C)(C)CC3=O)n2-c2ccc(C(N)=O)c(N[C@@H](C)[C@H](C)C1)c2	0	14	10	6	12	0.2533	11	1	2	10	1	-0.1177	-0.76	3.336	2.249	8	2
875	7.041	91	CC(C)[C@H](O)C(=O)N1CCc2c(C)c3c(CC(C)(C)CC3=O)n2-c2ccc(C(N)=O)c(N[C@@H](C)[C@H](C)C1)c2	0	14	10	6	12	0.2533	8	1	2	10	1	-0.1177	-0.2034	3.9721	3.952	9	2
876	6.839	145	C[C@H](N)C(=O)N1CC[C@H](C)Nc2cc(ccc2C(N)=O)-n2c3CC(C)(C)CC(=O)c3c(C)c2CC1	0	14	10	6	12	0.2533	11	1	2	10	0	-0.1177	-1.436	3.65649	2.933	7	2
877	4.839	14500	CCc1cc(\C=N\c2ccc3OCCOc3c2)c(O)cc1O	0	14	12	4	12	0.7126	8	0	0	0	0	-0.0953	-0.0633	3.58048	1.96	3	0
878	4.656	22100	CCc1cc(\C=N\c2ccc3OCOc3c2)c(O)cc1O	0	13	12	6	12	0.721	6	0	0	0	0	-0.0951	-0.081	3.53798	2.097	1	0
879	5.523	3000	CSc1nc(N)nc(n1)-c1c(Cl)cc2COCc3cccc1c23	0	15	13	7	13	0.6756	11	0	0	12	0	-0.2445	0.9827	3.34708	0.556	2	0
880	4.62	24000	CSc1nc(N)nc(SCc2ccc(Cl)cc2)n1	0	9	9	5	8	0.6455	8	0	0	6	0	-0.236	2.081	3.02537	0.814	1	0
881	5.018	9600	Cc1ccc(cc1)S(=O)(=O)c1cc(C)nc(N)n1	0	10	10	4	9	0.5451	7	0	0	9	0	-0.2367	0.7619	1.92143	-0.401	2	0
882	4.481	33000	CSc1nc(N)nc(SCCN2CCOCC2)n1	0	7	3	3	6	0.6042	5	0	0	3	0	0	0.4216	0.84347	-0.569	6	0
883	4.796	16000	CSc1nc(N)nc(SCc2ccccc2)n1	0	9	9	4	8	0.6045	6	0	0	6	0	-0.3374	1.7123	2.37197	0.87	1	0
884	5.161	6900	Cc1cc(nc(N)n1)-c1ccc2COCc3cccc1c23	0	16	14	8	15	0.3423	12	0	0	13	0	-0.3335	0.4443	3.17171	-0.049	3	0
885	5.886	1300	O=C(NC1c2ccccc2-c2c1cccc2-c1nc2ccncc2[nH]1)c1ccncc1	0	24	23	8	16	0.5213	14	1	1	20	0	-0.5212	-1.1481	3.98003	1.298	0	1
886	5.886	1300	O=C(NC1c2ccccc2-c2c1cccc2-c1nc2ccccc2[nH]1)c1cccc2ncccc12	0	29	28	11	21	0.4796	14	1	1	25	0	-0.8688	1.9342	6.14666	2.418	0	1
887	6.046	900	Nc1cc(ccn1)C(=O)NC1c2ccccc2-c2c1cccc2-c1nc2ccncc2[nH]1	0	24	23	10	17	0.6137	12	1	1	20	0	-0.4995	-1.5905	3.03512	0.806	0	1
888	7.523	30	O=C(N[C@@H]1c2ccccc2-c2c1cccc2-c1nc2ccncc2[nH]1)c1ccnc2[nH]ccc12	0	26	25	9	18	0.6781	14	1	1	22	0	-0.5234	-0.597	4.28444	1.411	0	1
889	6.815	153	CCNC(=O)c1noc(c1NC(=O)c1ccc(Br)cc1)-c1cc(Cl)c(O)cc1O	0	15	15	11	15	0.9921	14	1	1	9	1	-0.2167	0.5084	3.65516	2.76	2	2
890	6.735	184	CCNC(=O)c1noc(c1NC(=O)c1ccc(OC)cc1)-c1cc(Cl)c(O)cc1O	0	15	15	10	15	1.0945	13	1	1	9	1	-0.1563	-0.4429	2.90126	2.247	2	2
891	6.788	163	CCNC(=O)c1noc(c1NC(=O)c1ccc(OC)c(OC)c1)-c1cc(Cl)c(O)cc1O	0	15	15	11	15	1.3015	15	1	1	9	1	-0.0912	-0.9415	2.90986	2.487	2	2
892	6.886	130	CCNC(=O)c1noc(c1NC(=O)c1cc(OC)c(OC)c(OC)c1)-c1cc(Cl)c(O)cc1O	0	15	15	9	14	1.5166	14	1	1	9	1	-0.0333	-1.4401	2.91846	2.727	2	2
893	7.131	74	CCNC(=O)c1noc(c1NC(=O)c1sccc1C)-c1cc(Cl)c(O)cc1O	0	13	13	9	13	1.0142	13	1	1	9	1	-0.1311	-0.1473	3.03689	2.538	3	2
894	7.432	37	CCNC(=O)c1noc(c1NC(C)=O)-c1cc(Cl)c(O)cc1O	0	9	9	6	9	0.9368	9	1	2	8	1	-0.0255	-1.1422	1.65347	1.578	3	2
895	7.071	85	CCNC(=O)c1noc(c1NC(=O)C(C)(C)C)-c1cc(Cl)c(O)cc1O	0	9	9	6	9	0.9368	9	1	2	8	1	-0.0255	0.4041	2.67967	2.325	5	2
896	6.777	167	CCNC(=O)c1noc(c1NC(=O)C=C)-c1cc(Cl)c(O)cc1O	0	9	9	6	9	0.937	9	1	1	8	1	-0.0255	-0.5513	1.74576	1.87	2	2
897	6.796	160	COc1ccc(cc1)C(=O)Nc1c(noc1-c1cc(Cl)c(O)cc1O)C(=O)NCC(F)(F)F	0	15	15	8	15	1.0945	12	1	1	9	1	-0.1563	0.3141	4.01836	3.249	2	2
898	6.775	168	CCNC(=O)c1noc(c1NC(=O)CCN1CCOCC1)-c1cc(Cl)c(O)cc1O	0	13	9	9	13	0.9368	11	1	1	8	1	-0.0255	-1.2002	1.35587	0.861	7	2
899	7.26	55	CCNC(=O)c1noc(c1NC(C)=O)-c1cc(C(C)C)c(O)cc1O	0	9	9	6	9	0.8364	9	1	2	8	1	-0.043	-1.1336	2.12347	2.15	5	2
900	7.387	41	CCNC(=O)c1noc(c1NC(=O)C(C)(C)C)-c1cc(C(C)C)c(O)cc1O	0	9	9	6	9	0.8364	9	1	2	8	1	-0.043	0.4127	3.14967	2.897	7	2
901	6.721	190	CCNC(=O)c1noc(c1NC(=O)C1CCCCC1)-c1cc(C(C)C)c(O)cc1O	0	15	9	8	15	0.8364	13	1	2	8	1	-0.043	-1.641	3.68387	4.063	4	2
902	6.585	260	CCCCC[C@H]1CC[C@@H](CC1)C(=O)Nc1c(noc1-c1cc(C(C)C)c(O)cc1O)C(=O)NCC	0	15	9	11	15	0.8364	13	1	2	8	1	-0.043	-1.4042	5.56418	6.395	5	2
903	6.62	240	CCNC(=O)c1noc(c1NC(=O)C1CCC(CC1)C(F)(F)F)-c1cc(C(C)C)c(O)cc1O	0	15	9	8	15	0.8364	15	1	2	8	1	-0.043	0.5262	4.47227	4.729	5	2
904	7.62	24	CCNC(=O)c1noc(c1NC(=O)[C@@H]1CC[C@@H](CC1)OC)-c1cc(C(C)C)c(O)cc1O	0	15	9	8	15	0.8364	14	1	2	8	1	-0.043	-1.4552	3.30877	2.919	4	2
905	7.523	30	CCNC(=O)c1noc(c1NC(=O)C1CCC(CC1)C(C)(C)C)-c1cc(C(C)C)c(O)cc1O	0	15	9	8	15	0.8364	14	1	2	8	1	-0.043	0.7091	4.95607	5.802	7	2
906	7.553	28	CCNC(=O)c1noc(c1NC(=O)[C@H]1CC[C@H](N)CC1)-c1cc(C(C)C)c(O)cc1O	0	15	9	7	15	0.8364	13	1	2	8	1	-0.043	-2.1533	2.62107	2.333	4	2
907	7.398	40	CCNC(=O)c1noc(c1NC(=O)[C@H]1CC[C@H](CN)CC1)-c1cc(C(C)C)c(O)cc1O	0	15	9	7	15	0.8364	13	1	2	8	1	-0.043	-1.5854	2.86867	2.076	5	2
908	8.268	5.4	CCNC(=O)c1noc(c1NC(=O)[C@H]1CC[C@H](CNS(=O)(=O)c2ccc(F)cc2)CC1)-c1cc(C(C)C)c(O)cc1O	0	21	15	9	14	1.0653	13	2	2	8	1	-0.1574	-1.2923	4.54146	3.871	5	2
909	7.409	39	CCNC(=O)c1noc(c1NC(=O)[C@@H]1CC[C@@H](C1)C(O)=O)-c1cc(C(C)C)c(O)cc1O	0	14	9	7	14	0.8364	14	1	2	8	1	-0.043	-1.0991	2.60447	2.124	4	2
910	7.9	12.6	CCNC(=O)c1noc(c1NC(=O)[C@@H]1CC[C@H](CO)C1)-c1cc(C(C)C)c(O)cc1O	0	14	9	8	14	0.8364	13	1	2	8	1	-0.043	-1.4694	2.51217	2.237	5	2
911	7.824	15	CCNC(=O)c1noc(c1NC(=O)[C@@H]1CC[C@H](CO)CC1)-c1cc(C(C)C)c(O)cc1O	0	15	9	7	15	0.8364	15	1	2	8	1	-0.043	-1.0206	2.90227	2.595	5	2
912	7.708	19.6	CCNC(=O)c1noc(c1NC(=O)[C@@H]1CC[C@H](CN2CCOCC2)CC1)-c1cc(C(C)C)c(O)cc1O	0	19	9	11	16	0.8364	14	1	2	8	1	-0.043	-0.93	3.24217	2.305	9	2
913	6.67	214	CCNC(=O)c1noc(c1NC(=O)CCN1CCOCC1)-c1cc(C(C)C)c(O)cc1O	0	13	9	9	13	0.8364	12	1	1	8	1	-0.043	-1.1916	1.82587	1.433	9	2
914	6.921	120	CCNC(=O)c1noc(c1NC(=O)CCN1CCN(C)CC1)-c1cc(C(C)C)c(O)cc1O	0	13	9	9	13	0.8364	12	1	1	8	1	-0.043	-1.1972	1.74107	1.024	9	2
915	7.585	26	CCNC(=O)c1noc(c1NC(=O)c1ccc(OC)cc1)-c1cc(C(C)C)c(O)cc1O	0	15	15	11	15	0.9941	13	1	1	9	1	-0.1738	-0.4343	3.37126	2.819	4	2
916	7.469	34	CCNC(=O)c1noc(c1NC(=O)c1ccc(OC)c(F)c1)-c1cc(C(C)C)c(O)cc1O	0	15	15	11	15	1.1973	15	1	1	9	1	-0.1161	-0.5245	3.51036	2.935	4	2
917	7.469	34	CCNC(=O)c1noc(c1NC(=O)c1ccc(cc1)N(C)C)-c1cc(C(C)C)c(O)cc1O	0	15	15	11	15	0.903	15	1	1	9	1	-0.2188	-0.1647	3.42866	3.113	4	2
918	7.149	71	CCNC(=O)c1noc(c1NC(=O)c1ccc(CN2CCOCC2)cc1)-c1cc(C(C)C)c(O)cc1O	0	19	15	11	17	0.8737	16	2	1	9	1	-0.2881	-1.5016	2.85536	2.953	9	2
919	7.62	24	CCNC(=O)c1noc(c1NC(=O)c1ccc(cc1)N1CCN(C)CC1)-c1cc(C(C)C)c(O)cc1O	0	19	15	13	17	0.9036	15	1	1	9	1	-0.2186	-1.2436	3.11446	3.053	8	2
920	7.495	32	CCNC(=O)c1noc(c1NC(=O)c1ccc(cc1)N1CCNCC1)-c1cc(C(C)C)c(O)cc1O	0	19	15	11	16	0.9036	14	1	1	9	1	-0.2186	-1.7795	2.77226	2.814	8	2
921	7.495	32	CCNC(=O)c1noc(c1NC(=O)c1ccc(cc1)-n1cccc1)-c1cc(C(C)C)c(O)cc1O	0	19	19	10	16	0.9395	14	1	1	18	1	-0.3002	-0.4757	4.17756	3.571	4	2
922	7.658	22	CCNC(=O)c1noc(c1NC(=O)c1ccc(cc1)N1CCCC1)-c1cc(C(C)C)c(O)cc1O	0	19	15	12	17	0.9035	15	1	1	9	1	-0.2186	-1.9583	3.96286	3.916	6	2
923	7.62	24	CCNC(=O)c1cc(on1)C(=O)Nc1c(noc1-c1cc(C(C)C)c(O)cc1O)C(=O)NCC	0	12	12	4	8	1.2496	7	2	2	11	1	-0.043	-1.771	2.11956	2.348	6	3
924	7.076	84	CCNC(=O)c1noc(c1NC(=O)c1sccc1C)-c1cc(C(C)C)c(O)cc1O	0	13	13	9	13	0.9138	13	1	1	9	1	-0.1486	-0.1387	3.50689	3.11	5	2
925	6.602	250	CCNC(=O)c1noc(c1NC(=O)c1cc(on1)-c1ccccc1)-c1cc(C(C)C)c(O)cc1O	0	18	18	10	15	1.2108	13	1	1	16	1	-0.3289	-0.2811	4.06606	3.805	4	2
926	7.569	27	CCNC(=O)c1noc(c1NC(=O)c1sc(nc1C)-c1ccncc1)-c1cc(C(C)C)c(O)cc1O	0	17	17	9	15	1.1677	13	1	1	16	1	-0.1108	-1.1164	3.68405	2.483	5	2
927	7.398	40	CCNC(=O)c1noc(c1NC(=O)c1nc(C)c(s1)-c1ccc(F)cc1)-c1cc(C(C)C)c(O)cc1O	0	18	18	10	15	1.2204	12	1	1	16	1	-0.2058	0.6131	5.16158	3.015	5	2
928	7.444	36	CCNC(=O)c1noc(c1NC(=O)c1cccc2cccnc12)-c1cc(C(C)C)c(O)cc1O	0	18	18	10	18	1.012	14	1	1	17	1	-0.2975	-0.3861	4.02352	3.507	4	2
929	6.585	260	CCNC(=O)c1noc(c1NC(=O)c1oc2ccccc2c1C)-c1cc(C(C)C)c(O)cc1O	0	17	17	10	17	1.198	15	1	1	9	1	-0.2316	-0.0692	4.11768	3.352	5	2
930	7.319	48	CCNC(=O)c1noc(c1NC(=O)c1oc2ccc(OC)cc2c1C)-c1cc(C(C)C)c(O)cc1O	0	17	17	9	17	1.3228	13	1	1	9	1	-0.0836	-0.5678	4.12628	3.381	5	2
931	7.208	62	CCNC(=O)c1noc(c1NC(=O)c1cc2ccccc2n1C)-c1cc(C(C)C)c(O)cc1O	0	17	17	10	17	0.9922	14	1	1	16	1	-0.278	-0.246	4.25955	3.585	4	2
932	7.481	33	CCNC(=O)c1noc(c1NC(=O)c1ccc2cc[nH]c2c1)-c1cc(C(C)C)c(O)cc1O	0	17	17	8	17	0.9256	15	1	1	16	1	-0.2065	-1.0517	3.76725	2.975	4	2
933	7.469	34	CCNC(=O)c1noc(c1NC(=O)c1ccc2ccn(C)c2c1)-c1cc(C(C)C)c(O)cc1O	0	17	17	8	17	0.9306	15	1	1	16	1	-0.2059	-0.5158	4.25955	3.279	4	2
934	7.699	20	CCNC(=O)c1noc(c1NC(=O)c1ccc2ccsc2c1)-c1cc(C(C)C)c(O)cc1O	0	17	17	9	17	0.8948	15	1	1	9	1	-0.2611	-0.0407	4.03495	3.227	4	2
935	7.824	15	CCNC(=O)c1noc(c1NC(=O)c1ccc2ncoc2c1)-c1cc(C(C)C)c(O)cc1O	0	16	16	11	15	1.3254	15	1	1	15	1	-0.1273	-0.8311	3.42995	2.414	4	2
936	7.398	40	CCNC(=O)c1noc(c1NC(=O)c1cc(CN2CCOCC2)on1)-c1cc(C(C)C)c(O)cc1O	0	16	12	10	13	1.1708	11	2	1	11	1	-0.043	-1.6557	1.82416	1.503	9	2
937	6.638	230	CCNC(=O)c1noc(c1NCc1sccc1C)-c1cc(Cl)c(O)cc1O	0	13	13	5	13	0.9399	10	1	1	9	0	-0.1395	0.0787	2.9501	2.923	4	1
938	6.367	430	CCNC(=O)c1noc(c1NCc1ccc(OC)cc1)-c1cc(Cl)c(O)cc1O	0	15	15	7	15	1.0503	10	1	1	9	0	-0.2021	-0.2169	3.35688	2.669	3	1
939	6.208	620	CCNC(=O)c1noc(c1NC1CCCCC1)-c1cc(Cl)c(O)cc1O	0	15	9	8	15	0.9301	13	1	3	8	0	-0.0255	-2.4281	3.82028	3.798	2	1
940	5.796	1600	CCNC(=O)c1noc(c1NC1CCN(C)CC1)-c1cc(Cl)c(O)cc1O	0	14	9	8	14	0.9301	12	1	1	8	0	-0.0255	-1.4254	2.58178	2.366	4	1
941	7.854	14	CCNC(=O)c1noc(c1NC(=O)C1CC(O)C1)-c1cc(C(C)C)c(O)cc1O	0	13	9	8	13	0.8364	13	1	2	8	1	-0.043	-1.2877	1.87447	1.684	4	2
942	5.52	3020	COc1ccc(cc1)N(C)C(=O)c1ccc(O)cc1O	0	12	12	5	12	0.5104	7	0	0	0	1	-0.1718	0.0071	2.44847	1.473	0	1
943	5.527	2970	CN(C)C(=O)c1ccc(cc1)N(C)C(=O)c1ccc(O)cc1O	0	12	12	4	9	0.427	7	1	0	0	1	-0.2368	-0.1201	1.58617	0.698	0	2
944	6.156	698	Nc1nc(Cl)c2cnn(Cc3cc4OCOc4cc3Br)c2n1	1	12	11	4	10	1.0233	9	0	0	11	0	-0.0205	0.6522	4.48278	1.296	1	0
945	6.427	374	COc1ccc(Cn2cc(c(c2)-c2ccc(O)c(O)c2)-c2ccc(O)c(O)c2)cc1OC	0	22	22	7	17	0.9987	12	0	0	20	0	-0.2793	-0.099	5.11999	3.736	1	0
946	6.07	852	COc1cc(Cn2cc(c(c2)-c2ccc(O)c(O)c2)-c2ccc(O)c(O)c2)cc(OC)c1OC	0	22	22	5	17	1.2099	11	0	0	20	0	-0.2176	-0.5976	5.12859	3.976	1	0
947	6.124	752	COc1ccc(Cn2cc(c(c2)-c2ccc(O)c(O)c2)-c2ccc(O)c(O)c2)cc1	0	22	22	7	17	0.7955	11	0	0	20	0	-0.3482	0.3996	5.11139	3.496	1	0
948	6.545	285	COC(=O)[C@@H](CC(C)C)NC(=O)[C@H](NC(=O)c1noc(c1-c1ccc(CN2CCOCC2)cc1)-c1cc(C(C)C)c(O)cc1O)C(C)C	0	19	15	5	15	0.756	11	2	1	13	0	-0.3089	-0.7559	4.46238	5.145	11	2
949	6.587	259	COC(=O)[C@H](NC(=O)[C@H](NC(=O)[C@H](NC(=O)c1noc(c1-c1ccc(CN2CCOCC2)cc1)-c1cc(C(C)C)c(O)cc1O)C(C)C)C(C)C)C(C)C	0	19	15	6	12	0.756	9	2	1	13	0	-0.3089	-1.2305	4.21308	4.718	13	3
950	6.325	473	COC(=O)[C@H](NC(=O)c1cnc(nc1)N1CCN(CC1)C(=O)c1noc(c1-c1ccc(CN2CCOCC2)cc1)-c1cc(C(C)C)c(O)cc1O)C(C)C	0	27	19	4	11	1.1366	8	3	1	17	0	-0.3089	-1.3677	4.03436	3.324	13	2
951	7.009	98	COC(=O)[C@H](NC(=O)CCCCCNC(=O)c1noc(c1-c1ccc(CN2CCOCC2)cc1)-c1cc(C(C)C)c(O)cc1O)C(C)C	0	19	15	5	13	0.7559	9	2	1	13	0	-0.3089	-2.2449	4.60808	4.416	10	2
952	6.914	122	COC(=O)[C@@H](Cc1ccccc1)NC(=O)COCCOCCOCCNC(=O)c1noc(c1-c1ccc(CN2CCOCC2)cc1)-c1cc(C(C)C)c(O)cc1O	0	25	21	3	10	0.7559	8	2	1	13	0	-0.6557	-2.5323	3.68418	5.224	14	2
953	7.102	79	COC(=O)[C@H](NC(=O)c1noc(c1-c1ccc(CN2CCOCC2)cc1)-c1cc(C(C)C)c(O)cc1O)C(C)C	0	19	15	7	13	0.756	10	2	1	13	0	-0.3089	-0.7925	3.93148	4.012	9	1
954	6.289	514	COC(=O)[C@H](CCCCNC(=O)OCc1ccccc1)NC(=O)c1noc(c1-c1ccc(CN2CCOCC2)cc1)-c1cc(C(C)C)c(O)cc1O	0	25	21	4	14	0.756	11	2	1	13	0	-0.6145	-2.2902	5.03268	6.587	9	2
955	7.143	72	COC(=O)[C@@H](CO)NC(=O)c1noc(c1-c1ccc(CN2CCOCC2)cc1)-c1cc(C(C)C)c(O)cc1O	0	19	15	9	16	0.756	12	2	1	13	1	-0.3089	-1.8141	2.26778	2.225	8	1
956	6.434	368	COC(=O)[C@@H](Cc1c[nH]c2ccccc12)NC(=O)c1noc(c1-c1ccc(CN2CCOCC2)cc1)-c1cc(C(C)C)c(O)cc1O	0	27	23	8	21	0.8116	14	2	0	21	0	-0.54	-1.7234	4.92277	5.221	7	1
957	6.724	189	CCOC(=O)[C@H](NC(=O)c1noc(c1-c1ccc(CN2CCOCC2)cc1)-c1cc(C(C)C)c(O)cc1O)C(C)C	0	19	15	8	14	0.756	12	2	1	13	0	-0.3089	-0.5421	4.32158	4.435	11	1
958	7.678	21	CNC(=O)[C@H](NC(=O)c1noc(c1-c1ccc(CN2CCOCC2)cc1)-c1cc(C(C)C)c(O)cc1O)C(C)C	0	19	15	8	16	0.756	13	2	1	13	0	-0.3089	-1.3362	3.50448	3.481	9	2
959	7.553	28	CCNC(=O)[C@H](NC(=O)c1noc(c1-c1ccc(CN2CCOCC2)cc1)-c1cc(C(C)C)c(O)cc1O)C(C)C	0	19	15	8	15	0.756	13	2	1	13	0	-0.3089	-1.0858	3.89458	3.904	11	2
960	7.409	39	CC(C)[C@@H](NC(=O)c1noc(c1-c1ccc(CN2CCOCC2)cc1)-c1cc(C(C)C)c(O)cc1O)C(=O)N1CC(F)(F)C1	0	22	15	8	17	0.756	13	2	0	13	0	-0.3089	0.6149	4.23598	3.183	11	2
961	6.368	429	CC(C)[C@@H](NC(=O)c1noc(c1-c1ccc(CN2CCOCC2)cc1)-c1cc(C(C)C)c(O)cc1O)C(=O)N1CCN(C)CC1	0	23	15	9	19	0.756	11	2	0	13	0	-0.3089	-1.2766	3.53248	3.266	13	2
962	6.686	206	CC(C)[C@@H](NC(=O)c1noc(c1-c1ccc(CN2CCOCC2)cc1)-c1cc(C(C)C)c(O)cc1O)C(=O)NCCN1CCOCC1	0	23	15	8	17	0.756	13	2	1	13	0	-0.3089	-1.5098	3.20688	2.934	15	2
963	6.686	206	COC(=O)[C@H](NC(=O)[C@H](NC(=O)c1noc(c1-c1ccc(CN2CCOCC2)cc1)-c1cc(C(C)C)c(O)cc1O)C(C)C)C(C)C	0	19	15	8	15	0.756	12	2	1	13	0	-0.3089	-1.0115	4.07228	4.365	11	2
964	6.821	151	COC(=O)[C@@H](CC(C)C)NC(=O)c1noc(c1-c1ccc(CN2CCOCC2)cc1)-c1cc(C(C)C)c(O)cc1O	0	19	15	7	17	0.756	13	2	1	13	0	-0.3089	-0.5369	4.32158	4.792	9	1
965	6.951	112	CC(C)[C@@H](NC(=O)c1noc(c1-c1ccc(CN2CCOCC2)cc1)-c1cc(C(C)C)c(O)cc1O)C(=O)OC(C)(C)C	0	19	15	9	15	0.756	11	2	1	13	0	-0.3089	0.1388	5.10018	5.312	12	1
966	6.401	397	COC(=O)[C@@H](Cc1ccccc1)NC(=O)[C@H](NC(=O)c1noc(c1-c1ccc(CN2CCOCC2)cc1)-c1cc(C(C)C)c(O)cc1O)C(C)C	0	25	21	6	16	0.756	9	2	1	13	0	-0.6557	-1.522	4.65898	6.975	9	2
967	6.513	307	COC(=O)[C@@H](Cc1ccccc1)NC(=O)CCCCCNC(=O)c1noc(c1-c1ccc(CN2CCOCC2)cc1)-c1cc(C(C)C)c(O)cc1O	0	25	21	5	12	0.7559	7	2	1	13	0	-0.6557	-2.7554	5.19478	7.026	8	2
968	6.812	154	COC(=O)[C@H](NC(=O)COCCOCCNC(=O)c1noc(c1-c1ccc(CN2CCOCC2)cc1)-c1cc(C(C)C)c(O)cc1O)C(C)C	0	19	15	5	14	0.7559	12	2	1	13	0	-0.3089	-1.8909	3.08088	2.804	14	2
969	4.699	20000	COc1ccc(cc1)N1C(O)c2ccccc2N=C1\C=C\c1cccc(OC)c1O	0	20	18	3	13	0.8514	8	0	0	0	0	-0.3606	0.9215	4.21267	2.602	1	0
970	6	1000	CCCCn1c(Cc2cc(OC)c(OC)c(OC)c2)nc2c(N)ncnc12	0	11	11	5	9	1.2314	8	0	0	10	0	-0.058	-2.3696	3.44798	1.601	2	0
971	5.208	6200	Oc1cc(O)c(Cl)c(CCc2nccn2Cc2ccccc2)c1Cl	0	15	15	5	11	0.6567	7	0	0	12	0	-0.3293	0.5297	5.07749	3.033	1	0
972	6.152	705	Cc1cn(c2CC(C)(C)CC(=O)c12)-c1ccc2cnc(N)nc2c1	0	16	12	8	15	0.4887	12	0	0	12	0	-0.1198	0.9138	4.42559	1.598	3	0
973	6.246	568	Cc1cn(c2CC(C)(C)CC(=O)c12)-c1ccc2c(N)ncnc2c1	0	16	12	8	15	0.5022	12	0	0	12	0	-0.1179	0.3954	4.0204	1.44	3	0
974	6.136	731	Cc1cn(c2CC(C)(C)CC(=O)c12)-c1ccc2c(N)nc(C)nc2c1	0	16	12	7	16	0.513	12	0	0	12	0	-0.1179	0.4742	4.50832	1.99	4	0
975	5.722	1898	Cc1cn(c2CC(C)(C)CC(=O)c12)-c1ccc2c(N)nc(N)nc2c1	0	16	12	7	15	0.6023	12	0	0	12	0	-0.1178	0.1618	4.00779	2.556	3	0
976	6.177	665	Cc1cn(c2CC(C)(C)CC(=O)c12)-c1ccc2c(N)ncnc2c1F	0	16	12	7	15	0.7492	12	0	0	12	0	-0.1031	0.3052	4.1595	1.556	3	0
977	5.133	7369	CCCCOc1c(ccc2c(N)ncnc12)-n1cc(C)c2c1CC(C)(C)CC2=O	0	16	12	7	15	0.76	12	0	1	12	0	-0.1024	-0.7186	5.70009	3.03	5	0
978	5.111	7752	CCCCNc1c(ccc2c(N)ncnc12)-n1cc(C)c2c1CC(C)(C)CC2=O	0	16	12	7	14	0.6237	12	0	1	12	0	-0.1043	-0.9849	5.83249	2.761	5	0
979	6.397	401	CCCCSc1c(ccc2c(N)ncnc12)-n1cc(C)c2c1CC(C)(C)CC2=O	0	16	12	7	16	0.588	12	0	1	12	0	-0.1051	0.0261	5.34569	3.422	5	0
980	5.437	3655	Cc1cn(c2CC(C)(C)CC(=O)c12)-c1ccc2c(N)ncnc2c1SCC=C	0	16	12	7	14	0.5883	12	0	0	12	0	-0.1051	1.2583	5.22469	2.487	4	0
981	5.001	9974	Cc1cc2c(CC(C)(C)CC2=O)n1-c1ccc2c(N)ncnc2c1	0	16	12	7	15	0.5076	12	0	0	12	0	-0.1262	0.4627	4.0204	1.495	3	0
982	5.236	5813	Cc1nn(c2CC(C)(C)CC(=O)c12)-c1ccc2c(N)ncnc2c1	0	15	11	7	14	0.6201	11	0	0	11	0	-0.0929	-0.0935	3.8753	0.914	3	0
983	6.303	498	Cc1c(C)n(c2CC(C)(C)CC(=O)c12)-c1ccc2c(N)ncnc2c1	0	16	12	8	15	0.5137	12	0	0	12	0	-0.115	0.9091	4.04842	1.676	4	0
984	5.346	4510	CCc1nn(c2CC(C)(C)CC(=O)c12)-c1ccc2c(N)ncnc2c1	0	15	11	7	13	0.6232	11	0	0	11	0	-0.0929	-0.0173	3.94978	1.167	3	0
985	4.771	16960	CC1(C)Cc2c(c(nn2-c2ccc3c(N)ncnc3c2)C(F)(F)F)C(=O)C1	0	15	11	7	13	0.7347	11	0	0	11	0	-0.0929	0.9947	4.52498	1.613	3	0
986	5.422	3783	Cc1nn(c2CC(C)(C)CC(=O)c12)-c1ccc2c(N)ncnc2c1F	0	15	11	7	14	0.8683	10	0	0	11	0	-0.0797	-0.1837	4.0144	1.03	3	0
987	5.602	2500	CCc1ccc(Cc2n[nH]c3cc(O)c(cc23)C(=O)N(C)Cc2ccccc2)cc1	0	19	19	6	9	0.3842	7	1	0	12	1	-0.6858	1.5171	4.44057	4.46	2	1
988	6.009	980	CN(Cc1ccc(Cl)c(F)c1)C(=O)c1cc2c(Cc3ccccc3)n[nH]c2cc1O	0	19	19	8	13	0.6022	10	1	0	12	1	-0.5211	1.6843	4.72538	3.664	1	1
989	6.108	780	CN(Cc1ccccc1Br)C(=O)c1cc2c(Cc3cccc(C)c3)n[nH]c2cc1O	0	19	19	7	15	0.4068	11	1	0	12	1	-0.6018	2.3049	4.7234	4.327	2	1
990	5.721	1900	CCCN(C)C(=O)c1cc2c(Cc3ccccc3)n[nH]c2cc1O	0	13	13	7	10	0.3841	8	1	0	12	1	-0.3777	-0.0387	3.48218	3.293	2	1
991	6.046	900	Cc1ccc(cc1)-c1nc(N)nc2ccc(Cl)cc12	0	14	14	8	13	0.4448	11	0	0	14	0	-0.379	1.9672	4.4192	1.644	1	0
992	5.745	1800	CCCCN(C)C(=O)c1cc2c(Cc3ccccc3)n[nH]c2cc1O	0	13	13	6	10	0.3841	8	1	0	12	1	-0.3777	-1.6051	3.87228	5.785	2	1
993	5.398	4000	COCCN(C)C(=O)c1cc2c(Cc3ccccc3)n[nH]c2cc1O	0	13	13	6	9	0.3841	7	1	0	12	1	-0.3777	0.1578	2.71858	2.322	2	1
994	6.18	660	CN(Cc1ccccc1)C(=O)c1cc2c(Cc3ccccc3)n[nH]c2cc1O	0	19	19	7	17	0.3842	15	1	0	12	1	-0.7067	1.4058	3.93288	3.604	1	1
995	6.215	610	CN(C(=O)c1cc2c(Cc3ccccc3)n[nH]c2cc1O)c1ccco1	0	17	17	6	10	0.6735	7	0	0	12	1	-0.4004	0.4562	3.48917	3.257	0	1
996	6.638	230	CN(Cc1ccccc1)C(=O)c1cc2c(CCc3ccccc3)n[nH]c2cc1O	0	19	19	5	14	0.3799	12	1	0	10	1	-0.713	1.4682	3.85498	3.984	1	1
997	6.046	900	CN(Cc1ccccc1F)C(=O)c1cc2c(Cc3ccccc3)n[nH]c2cc1O	0	19	19	7	13	0.5173	9	1	0	12	1	-0.5784	1.3156	4.07198	3.298	1	1
998	5.959	1100	CN(Cc1ccccc1Cl)C(=O)c1cc2c(Cc3ccccc3)n[nH]c2cc1O	0	19	19	6	11	0.4298	9	1	0	12	1	-0.6101	1.7745	4.58628	3.759	1	1
999	6.215	610	CN(Cc1ccccc1Br)C(=O)c1cc2c(Cc3ccccc3)n[nH]c2cc1O	0	19	19	11	15	0.4068	13	1	0	12	1	-0.6194	1.8585	4.69538	3.935	1	1
1000	6.131	740	CN(Cc1ccccc1C)C(=O)c1cc2c(Cc3ccccc3)n[nH]c2cc1O	0	19	19	7	12	0.3842	9	1	0	12	1	-0.6889	1.8522	3.9609	3.996	2	1
1001	5.77	1700	COc1ccccc1CN(C)C(=O)c1cc2c(Cc3ccccc3)n[nH]c2cc1O	0	19	19	4	9	0.5205	7	1	0	12	1	-0.5704	0.9072	4.49698	3.422	1	1
1002	6.244	570	CN(Cc1cccc(F)c1)C(=O)c1cc2c(Cc3ccccc3)n[nH]c2cc1O	0	19	19	8	17	0.5079	15	1	0	12	1	-0.5689	1.3156	4.07198	3.087	1	1
1003	5.824	1500	CN(Cc1cccc(Cl)c1)C(=O)c1cc2c(Cc3ccccc3)n[nH]c2cc1O	0	19	19	6	11	0.4255	9	1	0	12	1	-0.6056	1.7745	4.58628	3.548	1	1
1004	5.886	1300	CN(Cc1cccc(Br)c1)C(=O)c1cc2c(Cc3ccccc3)n[nH]c2cc1O	0	19	19	8	13	0.4024	11	1	0	12	1	-0.615	1.8585	4.69538	3.724	1	1
1005	6.009	980	COc1cccc(CN(C)C(=O)c2cc3c(Cc4ccccc4)n[nH]c3cc2O)c1	0	19	19	5	9	0.5046	7	1	0	12	1	-0.5544	0.9072	4.44227	3.211	1	1
1006	5.959	1100	CN(Cc1ccc(F)cc1)C(=O)c1cc2c(Cc3ccccc3)n[nH]c2cc1O	0	19	19	9	15	0.5076	10	1	0	12	1	-0.5686	1.3156	4.07198	3.087	1	1
1007	6.481	330	CN(Cc1ccc(Cl)cc1)C(=O)c1cc2c(Cc3ccccc3)n[nH]c2cc1O	0	19	19	11	17	0.4252	15	1	0	12	1	-0.6053	1.7745	4.58628	3.548	1	1
1008	5.959	1100	CN(Cc1ccc(Br)cc1)C(=O)c1cc2c(Cc3ccccc3)n[nH]c2cc1O	0	19	19	9	14	0.4021	13	1	0	12	1	-0.6147	1.8585	4.69538	3.724	1	1
1009	6.201	630	CN(Cc1ccc(C)cc1)C(=O)c1cc2c(Cc3ccccc3)n[nH]c2cc1O	0	19	19	6	16	0.3842	14	1	0	12	1	-0.6888	1.8522	3.9609	3.996	2	1
1010	6.409	390	CCc1ccc(CN(C)C(=O)c2cc3c(Cc4ccccc4)n[nH]c3cc2O)cc1	0	19	19	5	10	0.3842	6	1	0	12	1	-0.6856	1.5171	4.49528	4.46	2	1
1011	6.119	760	CCOc1ccc(CN(C)C(=O)c2cc3c(Cc4ccccc4)n[nH]c3cc2O)cc1	0	19	19	3	13	0.5047	8	1	0	12	1	-0.554	1.1576	4.83237	3.634	3	1
1012	6.328	470	COc1cccc(CN(C)C(=O)c2cc3c(Cc4ccccc4)n[nH]c3cc2O)c1OC	0	19	19	3	12	0.7272	9	1	0	12	1	-0.5052	0.4086	4.50558	3.451	1	1
1013	5.638	2300	COc1cc(CN(C)C(=O)c2cc3c(Cc4ccccc4)n[nH]c3cc2O)ccc1Cl	0	19	19	3	10	0.6053	7	1	0	12	1	-0.5131	1.2759	5.09567	3.788	1	1
1014	5.585	2600	CN(Cc1ccccc1)C(=O)c1cc2c(Cc3ccccc3Cl)n[nH]c2cc1O	0	19	19	7	12	0.4287	10	1	0	12	1	-0.609	1.7745	4.58628	3.337	1	1
1015	5.62	2400	CN(Cc1ccccc1)C(=O)c1cc2c(Cc3ccccc3C)n[nH]c2cc1O	0	19	19	7	11	0.3842	7	1	1	12	1	-0.6892	1.8522	3.9609	3.996	2	1
1016	5.886	1300	CN(Cc1ccccc1)C(=O)c1cc2c(Cc3cccc(F)c3)n[nH]c2cc1O	0	19	19	7	12	0.5079	8	1	0	12	1	-0.569	1.3156	4.07198	2.876	1	1
1017	6.398	400	CN(Cc1ccccc1)C(=O)c1cc2c(Cc3cccc(Cl)c3)n[nH]c2cc1O	0	19	19	9	17	0.4254	15	1	0	12	1	-0.6056	1.7745	4.58628	3.337	1	1
1018	5.824	1500	Cc1cccc(Cc2n[nH]c3cc(O)c(cc23)C(=O)NCc2ccccc2)c1	0	19	19	7	8	0.384	7	1	0	12	1	-0.6893	1.7499	3.56399	4.283	2	1
1019	6.602	250	CN(Cc1ccccc1)C(=O)c1cc2c(Cc3cccc(C)c3)n[nH]c2cc1O	0	19	19	5	17	0.3842	12	1	0	12	1	-0.6891	1.8522	3.9609	3.996	2	1
1020	5.854	1400	COc1cccc(Cc2n[nH]c3cc(O)c(cc23)C(=O)N(C)Cc2ccccc2)c1	0	19	19	7	10	0.5046	8	1	0	12	1	-0.5545	0.9072	4.38756	3	1	1
1021	5.886	1300	CCc1cccc(Cc2n[nH]c3cc(O)c(cc23)C(=O)N(C)Cc2ccccc2)c1	0	19	19	7	9	0.3842	7	1	0	12	1	-0.6856	1.5171	4.44057	4.46	2	1
1022	5.886	1300	CN(Cc1ccccc1)C(=O)c1cc2c(Cc3ccc(C)cc3)n[nH]c2cc1O	0	19	19	7	12	0.3842	8	1	0	12	1	-0.6892	1.8522	3.9609	3.996	2	1
1023	6.229	590	CN(Cc1ccccc1Br)C(=O)c1cc2c(Cc3cccc(Cl)c3)n[nH]c2cc1O	0	19	19	5	17	0.448	13	1	0	12	1	-0.5183	2.2272	5.34878	3.668	1	1
1024	6.149	710	CN(Cc1cccc(F)c1)C(=O)c1cc2c(Cc3cccc(Cl)c3)n[nH]c2cc1O	0	19	19	7	12	0.5491	8	1	0	12	1	-0.4678	1.6843	4.72538	2.82	1	1
1025	6.097	800	CN(Cc1ccc(F)cc1)C(=O)c1cc2c(Cc3cccc(Cl)c3)n[nH]c2cc1O	0	19	19	7	12	0.5488	10	1	0	12	1	-0.4675	1.6843	4.72538	2.82	1	1
1026	6.097	800	COc1ccc(CN(C)C(=O)c2cc3c(Cc4cccc(Cl)c4)n[nH]c3cc2O)cc1	0	19	19	4	13	0.5455	7	1	0	12	1	-0.4529	1.2759	5.09567	2.944	1	1
1027	6.137	730	COc1ccc(CN(C)C(=O)c2cc3c(Cc4cccc(Cl)c4)n[nH]c3cc2O)cc1OC	0	19	19	3	14	0.7487	7	1	0	12	1	-0.384	0.7773	5.10427	3.184	1	1
1028	6.387	410	CN(Cc1cccc(NS(C)(=O)=O)c1)C(=O)c1cc2c(Cc3cccc(Cl)c3)n[nH]c2cc1O	0	19	19	6	16	0.4734	15	1	0	12	1	-0.4956	0.4935	5.03858	2.269	1	1
1029	6.432	370	CN(Cc1cccc(F)c1)C(=O)c1cc2c(Cc3cccc(C)c3)n[nH]c2cc1O	0	19	19	6	17	0.5079	11	1	0	12	1	-0.5513	1.762	4.1	3.479	2	1
1030	6.237	580	CN(Cc1ccc(F)cc1)C(=O)c1cc2c(Cc3cccc(C)c3)n[nH]c2cc1O	0	19	19	8	18	0.5076	16	1	0	12	1	-0.551	1.762	4.1	3.479	2	1
1031	6.337	460	COc1ccc(CN(C)C(=O)c2cc3c(Cc4cccc(C)c4)n[nH]c3cc2O)cc1	0	19	19	6	9	0.5043	7	1	0	12	1	-0.5364	1.3536	4.47029	3.603	2	1
1032	6.77	170	CN(Cc1ccc(Cl)c(F)c1)C(=O)c1cc2c(Cc3cccc(C)c3)n[nH]c2cc1O	0	19	19	6	17	0.6022	11	1	0	12	1	-0.5035	0.7856	4.7534	7.088	2	1
1033	6.167	680	COc1cc(CN(C)C(=O)c2cc3c(Cc4cccc(C)c4)n[nH]c3cc2O)ccc1Cl	0	19	19	2	12	0.6053	6	1	0	12	1	-0.4955	1.7223	5.12369	4.18	2	1
1034	6.237	580	COc1ccc(CN(C)C(=O)c2cc3c(Cc4cccc(C)c4)n[nH]c3cc2O)cc1OC	0	19	19	5	9	0.7075	7	1	0	12	1	-0.4675	0.855	4.47889	3.843	2	1
1035	6.301	500	CN(Cc1ccc(F)c(F)c1)C(=O)c1cc2c(Cc3cccc(C)c3)n[nH]c2cc1O	0	19	19	11	17	0.7013	15	1	0	12	1	-0.4837	1.6718	4.2391	3.595	2	1
1036	6.699	200	CN(Cc1cccc(NS(C)(=O)=O)c1)C(=O)c1cc2c(Cc3cccc(C)c3)n[nH]c2cc1O	0	19	19	8	18	0.4322	16	1	0	12	1	-0.5791	0.5712	4.4132	2.928	2	1
1037	6.456	350	CN(Cc1ccc(NS(C)(=O)=O)cc1)C(=O)c1cc2c(Cc3cccc(C)c3)n[nH]c2cc1O	0	19	19	9	19	0.4319	14	1	0	12	1	-0.5787	0.5712	4.4132	2.928	2	1
1038	7.678	21	CCNC(=O)c1noc(c1NC(=O)c1ccc(cc1)C(=O)NC(N)=N)-c1cc(C(C)C)c(O)cc1O	0	15	15	10	15	0.9269	14	2	1	9	1	-0.2358	-0.7243	1.93122	1.617	4	3
1039	7.328	47	COc1ccc(NC(=O)CNC(=O)CN2CCN(Cc3ccc4CN(Cc4c3)C(=O)c3cc(C(C)C)c(O)cc3O)CC2)cc1Nc1ncc(Cl)c(Nc2ccccc2S(=O)(=O)C(C)C)n1	0	34	28	6	17	1.2981	14	2	1	14	1	-0.5531	-3.0694	7.69895	5.635	13	3
1040	7.398	40	COc1ccc(NC(=O)CN2CCN(Cc3ccc4CN(Cc4c3)C(=O)c3cc(C(C)C)c(O)cc3O)CC2)cc1Nc1ncc(Cl)c(Nc2ccccc2S(=O)(=O)C(C)C)n1	0	34	28	0	11	1.2981	4	2	1	14	1	-0.5531	-2.2328	8.58275	6.463	12	2
1041	6.91	123	CCNC(=O)c1noc(c1-c1ccc(cc1)C(=O)N1CCN(CC(=O)Nc2cccc(Nc3ncc(Cl)c(Nc4ccccc4S(=O)(=O)C(C)C)n3)c2)CC1)-c1cc(C(C)C)c(O)cc1O	0	35	31	5	11	1.5499	8	2	1	27	0	-0.611	-2.6652	9.61594	7.532	11	3
1042	6.432	370	CCNC(=O)c1noc(c1-c1ccc(CNCC(=O)Nc2cccc(Nc3ncc(Cl)c(Nc4ccccc4S(=O)(=O)C(C)C)n3)c2)cc1)-c1cc(C(C)C)c(O)cc1O	0	31	31	3	16	1.513	7	2	1	27	0	-0.6607	-2.4988	9.66295	8.023	8	2
1043	6.585	260	CCNC(=O)c1noc(c1-c1ccc(CNCC(=O)Nc2ccc(OC)c(Nc3ncc(Cl)c(Nc4ccccc4S(=O)(=O)C(C)C)n3)c2)cc1)-c1cc(C(C)C)c(O)cc1O	0	31	31	3	11	1.6968	5	2	1	27	0	-0.5713	-2.5506	10.1723	7.579	8	2
1044	7	100	CCNC(=O)c1noc(c1-c1ccc(CN2CCN(CC(=O)Nc3ccc(OC)c(Nc4ncc(Cl)c(Nc5ccccc5S(=O)(=O)C(C)C)n4)c3)CC2)cc1)-c1cc(C(C)C)c(O)cc1O	0	35	31	0	9	1.6968	5	2	1	27	0	-0.5711	-2.0574	10.2003	7.461	12	2
1045	4.407	39200	COC(=O)c1c(O)cc(O)c(Cl)c1CCc1ccccc1Cc1ccc(F)cc1	0	18	18	6	14	0.612	10	0	0	0	0	-0.5368	2.9767	4.8653	5.17	0	0
1046	7.31	49	CC(C)c1cc(C(=O)N2CCc3cc(NC(=O)CCC(=O)NO)ccc23)c(O)cc1O	0	14	12	7	13	0.4312	11	0	1	0	3	-0.1767	-1.2548	1.83227	0.484	3	3
1047	7.066	86	CC(C)c1cc(C(=O)N2CCc3cc(NCc4ccc(cc4)C(=O)NO)ccc23)c(O)cc1O	0	20	18	6	13	0.4638	7	1	1	0	2	-0.4194	-0.0862	3.32567	1.498	4	2
1048	4.903	12500	Cc1c(CCO)sc[n+]1Cc1cnc(C)nc1N	0	7	7	5	6	0.8397	5	0	0	7	0	0	-1.6183	2.01801	-0.303	4	0
1049	5.155	7000	O=C1c2ccccc2C(=O)c2cc(Cn3cc(COCc4cn(Cc5ccc6C(=O)c7ccccc7C(=O)c6c5)nn4)nn3)ccc12	0	32	28	3	6	0.5846	4	2	0	16	0	-0.7982	1.3137	4.52769	0.086	4	0
1050	4.87	13500	Oc1cc(O)c2c(c1)oc(-c1cc(O)c(O)c(O)c1)c(O)c2=O	0	15	15	6	12	1.7407	8	0	0	0	0	-0.011	-1.4397	2.12976	2.259	0	0
1051	5.01	9780	CC(C)(C)c1ccccc1N1CCN(CC(O)COCCOc2ccc(Br)c(Cl)c2)CC1	0	16	12	0	13	0.2504	9	0	1	0	0	-0.3013	3.3955	5.47929	4.199	11	0
1052	5.36	4370	OC(COCCOc1ccc(Br)cc1)CN1CCN(CC1)c1ccccc1N1CCCCC1	0	21	12	2	17	0.2409	12	0	1	0	0	-0.3238	0.3918	5.04578	3.368	10	0
1053	6.194	640	COc1ccc(OCCOCC(O)CN2CCN(CC2)c2ccccc2C(C)(C)C)cc1	0	16	12	5	16	0.2746	14	0	1	0	0	-0.3051	2.0755	4.59908	3.109	11	0
1054	5.845	1430	CC(C)(C)c1ccccc1N1CCN(CC(O)COCCOc2cccc(Cl)c2)CC1	0	16	12	2	13	0.1999	7	0	1	0	0	-0.3606	2.9428	4.71679	3.446	11	0
1055	5.199	6320	CN(C)c1ccccc1N1CCN(CC(O)COCCOc2ccc(Br)cc2)CC1	0	16	12	2	13	0.2404	9	0	1	0	0	-0.3239	1.4372	4.12148	2.384	8	0
1056	5.275	5310	COc1ccccc1N1CCN(CC(O)COCCOc2ccc(Br)cc2)CC1	0	16	12	3	12	0.3518	6	0	1	0	0	-0.2996	1.1676	4.03778	2.09	8	0
1057	5.917	1210	COc1ccccc1OCCOCC(O)CN1CCN(CC1)c1ccccc1C(C)(C)C	0	16	12	4	16	0.357	13	0	1	0	0	-0.3879	2.0755	4.59908	3.109	11	0
1058	4.673	21230	CC(C)(C)c1ccccc1N1CCN(CC(O)COCCOc2ccc(F)cc2F)CC1	0	16	12	2	13	0.4956	7	0	1	0	0	-0.2763	1.8159	4.34159	5.242	11	0
1059	4.928	11790	CC(C)(C)c1ccccc1N1CCN(CC(O)COCCOc2cccc(c2)[N+]([O-])=O)CC1	0	16	12	0	11	0.5101	10	0	1	0	0	-0.3105	0.7169	4.64489	5.088	11	0
1060	5.192	6420	CC(C)(C)c1ccccc1N1CCN(CC(O)COCCOc2ccc(F)cc2)CC1	0	16	12	2	13	0.2779	7	0	1	0	0	-0.3195	1.3362	4.20249	5.283	11	0
1061	5.614	2430	CCc1ccccc1N1CCN(CC(O)COCCOc2ccc(Br)cc2)CC1	0	16	12	2	12	0.1718	7	0	1	0	0	-0.3716	1.7775	4.09079	2.706	9	0
1062	5.648	2250	CC(C)(C)c1ccccc1N1CCN(CC(O)COCCOc2ccccc2Br)CC1	0	16	12	1	12	0.2275	7	0	1	0	0	-0.4208	3.0268	4.82589	3.622	11	0
1063	4.816	15290	CN(C(=O)C(C)(C)C)c1ccccc1N1CCN(CC(O)COCCOc2ccc(Br)cc2)CC1	0	16	12	1	13	0.2473	7	0	2	0	0	-0.3235	1.2128	4.15668	3.887	11	1
1064	4.646	22610	Nc1ccccc1N1CCN(CC(O)COCCOc2ccc(Br)cc2)CC1	0	16	12	3	13	0.2354	8	0	1	0	0	-0.3243	0.4695	4.21888	1.358	8	0
1065	5.435	3670	OC(COCCOc1ccc(Br)cc1)CN1CCN(CC1)c1ccccc1OCc1ccccc1	0	22	18	4	18	0.3527	9	0	1	0	0	-0.6053	2.2847	5.29498	3.182	9	0
1066	4.941	11450	CC(=O)Nc1ccccc1N1CCN(CC(O)COCCOc2ccc(Br)cc2)CC1	0	16	12	1	12	0.2447	6	0	2	0	0	-0.3237	0.5945	3.10618	1.429	9	1
1067	5.265	5430	OC(COCCOc1ccc(Br)cc1)CN1CCN(CC1)c1ccccc1N1CCCC1	0	20	12	2	16	0.2409	9	0	1	0	0	-0.3238	0.6798	4.65568	3.01	10	0
1068	5.291	5120	Cc1ccccc1N1CCN(CC(O)COCCOc2ccc(Br)cc2)CC1	0	16	12	1	12	0.1715	6	0	1	0	0	-0.3747	2.1126	4.13821	2.242	9	0
1069	5.061	8690	CC(C)(C)c1ccccc1N1CCN(CC(O)COCCOc2ccc(OC(F)(F)F)cc2)CC1	0	16	12	1	12	0.2845	11	0	1	0	0	-0.3045	2.941	4.96199	6.132	11	0
1070	4.589	25770	OC(COCCOc1ccc(Br)cc1)CN1CCN(CC1)c1ccccc1C#N	0	16	12	3	12	0.2588	7	1	1	0	0	-0.3287	1.5053	3.92716	1.702	8	0
1071	4.438	36490	OC(COCCOc1ccc(Br)cc1)CN1CCN(CC1)c1ccccc1O	0	16	12	3	12	0.3484	7	0	1	0	0	-0.2998	1.1031	3.76108	1.769	8	0
1072	4.859	13840	CS(=O)(=O)Nc1ccccc1N1CCN(CC(O)COCCOc2ccc(Br)cc2)CC1	0	16	12	1	12	0.2598	8	0	2	0	0	-0.3225	0.3852	3.41378	1.415	8	0
1073	4.152	70430	COC(COCCOc1ccc(Br)cc1)CN1CCN(CC1)c1ccccc1C(C)(C)C	0	16	12	2	13	0.1723	7	0	1	0	0	-0.3655	3.4353	6.00708	4.141	11	0
1074	4.517	30410	OC(COCCOc1ccc(Br)cc1)CN1CCN(CC1)c1ccccc1[N+]([O-])=O	0	16	12	2	11	0.5581	5	0	1	0	0	-0.2752	1.8795	3.82268	2.067	8	0
1075	5.693	2030	COc1cccc(OCCOCC(O)CN2CCN(CC2)c2ccccc2C(C)(C)C)c1	0	16	12	5	16	0.303	13	0	1	0	0	-0.3334	2.0755	4.59908	3.109	11	0
1076	5.788	1630	COc1cc2OC[C@H]3Oc4c(ccc5OC(C)(C)C=Cc45)C(=O)[C@H]3c2cc1OC	0	19	12	8	17	0.8872	13	0	0	0	0	-0.0714	0.0347	6.01106	2.341	3	0
1077	7.143	72	CCc1c2Cn3c(cc4c(COC(=O)[C@@]4(CC)OC(=O)CNC(=O)c4noc(c4-c4ccc(CN5CCOCC5)cc4)-c4cc(C(C)C)c(O)cc4O)c3=O)-c2nc2ccc(O)cc12	0	37	29	3	21	1.4621	10	2	2	27	0	-0.4294	-3.3105	4.34459	5.13	12	1
1078	7.155	70	CCc1c2Cn3c(cc4c(COC(=O)[C@@]4(CC)OC(=O)CCNC(=O)c4noc(c4-c4ccc(CN5CCOCC5)cc4)-c4cc(C(C)C)c(O)cc4O)c3=O)-c2nc2ccc(O)cc12	0	37	29	2	11	1.462	5	2	3	27	0	-0.4294	-3.0623	4.73469	5.288	12	1
1079	7.284	52	CC(C)c1nn(-c2ccc(C(N)=O)c(N[C@H]3CC[C@H](O)CC3)c2)c2nccc(-n3cnc(c3)-n3ccnc3)c12	0	24	18	6	12	1.0626	10	1	1	18	0	-0.1147	-2.1558	4.96306	2.919	2	1
1080	6.438	365	NC(=O)c1ccc(cc1N[C@H]1CC[C@H](O)CC1)-n1ncc2c(cccc12)-c1cnc2ccccc2c1	0	28	22	7	15	0.4375	11	1	1	22	0	-0.5019	-1.0456	5.41926	2.747	0	1
1081	6.69	204	CC(C)c1nn(-c2ccc(cc2)C(N)=O)c2nccc(-n3cnc(c3)-c3cnn(C)c3)c12	0	18	18	4	12	0.8693	8	1	0	18	0	-0.1851	-0.2833	4.89185	1.4	2	1
1082	7.137	73	CC(C)c1nn(-c2ccc(C(N)=O)c(N[C@H]3CC[C@H](O)CC3)c2)c2nccc(-n3cnc(c3)-c3ccoc3)c12	0	25	19	6	12	1.034	10	1	1	19	0	-0.1294	-2.3231	6.06156	3.324	2	1
1083	7.041	91	CC(C)c1nn(-c2ccc(C(N)=O)c(N[C@H]3CC[C@H](O)CC3)c2)c2nccc(-n3cnc(c3)-c3cncnc3)c12	0	25	19	6	13	1.0351	9	1	1	19	0	-0.1147	-2.169	5.25856	2.775	2	1
1084	7.26	55	CC(C)c1nn(-c2ccc(C(N)=O)c(N[C@H]3CC[C@H](O)CC3)c2)c2nccc(-n3cnc(c3)-c3ccncc3)c12	0	26	20	6	12	0.8594	11	1	1	20	0	-0.1835	-2.5894	4.33701	3.594	2	1
1085	6.192	643	CC(C)c1nn(-c2ccc(C(N)=O)c(N[C@H]3CC[C@H](O)CC3)c2)c2nccc(-n3cnc(c3)-c3ccc(Oc4ccccc4)cc3)c12	0	33	27	4	11	1.0572	7	1	1	21	0	-0.4668	-2.3231	8.76165	7.201	2	1
1086	7.027	94	Cc1nn(-c2ccc(C(N)=O)c(N[C@H]3CC[C@H](O)CC3)c2)c2cccc(-c3cnc4ccccc4c3)c12	0	28	22	7	14	0.4513	12	1	1	22	0	-0.5017	-2.736	4.76064	5.623	1	1
1087	6.233	585	Cc1cn(-c2ccc(C(N)=O)c(N[C@H]3CC[C@H](O)CC3)c2)c2cccc(-c3cnc4ccccc4c3)c12	0	29	23	8	15	0.3361	12	1	1	23	0	-0.5325	-0.6182	6.10699	3.454	1	1
1088	7.268	54	CC(C)c1nn(-c2ccc(C(N)=O)c(N[C@H]3CC[C@H](O)CC3)c2)c2nccc(-n3cnc(c3)-c3cnn(C)c3)c12	0	24	18	6	13	0.9335	9	1	1	18	0	-0.1147	-2.8636	5.60725	2.387	2	1
1089	7.174	67	CC(C)c1nn(-c2ccc(C(N)=O)c(N[C@H]3CC[C@H](O)CC3)c2)c2cccc(-c3cnc4ccccc4c3)c12	0	28	22	8	14	0.4574	11	1	1	22	0	-0.5017	-0.3827	6.94785	3.474	2	1
1090	7.06	87	CC(C)c1nn(-c2ccc(C(N)=O)c(N[C@H]3CC[C@H](O)CC3)c2)c2nccc(-n3cnc(c3)-c3ccsc3)c12	0	25	19	6	13	0.8075	11	1	1	19	0	-0.199	-1.5784	6.53006	4.425	2	1
1091	7.319	48	CC(C)c1nn(-c2ccc(C(N)=O)c(N[C@H]3CC[C@H](O)CC3)c2)c2nccc(-n3cnc(c3)-c3cccnc3)c12	0	26	20	6	12	0.884	10	1	1	20	0	-0.2073	-2.5894	4.33701	3.594	2	1
1092	7.018	96	COc1ccc(cc1)-c1cn(cn1)-c1ccnc2n(nc(C(C)C)c12)-c1ccc(C(N)=O)c(N[C@H]2CC[C@H](O)CC2)c1	0	27	21	6	12	0.9204	9	1	1	21	0	-0.2515	-2.2208	7.38314	4.658	2	1
1093	4.367	42980	C\C(CC(O)=O)=C/CC12OCC3CC(C4OC44C(=O)c5c(O)cccc5OC134)C2=O	0	16	6	7	13	0.3702	10	0	0	0	0	-0.093	-1.3023	1.56879	-1.054	2	0
1094	4.373	42410	CC(=O)Oc1cccc2OC34C5CC(C=C3C(=O)c12)C(=O)C4(CC=C(C)C)OC5(C)C	0	16	6	7	16	0.3881	13	0	0	0	0	-0.092	0.9239	4.32807	1.895	5	0
1095	4.866	13620	CC(C)=CCC12OCC3CC(C=C4C(=O)c5c(OS(C)(=O)=O)cccc5OC134)C2=O	0	16	6	8	16	0.4152	14	0	0	0	0	-0.0897	0.1321	3.54258	-0.092	3	0
1096	4.621	23930	CC(C)=CCC12OC(C)(C)C3CC(C=C4C(=O)c5ccccc5OC134)C2=O	0	16	6	10	16	0.1965	13	0	0	0	0	-0.1858	1.4519	3.90198	1.996	4	0
1097	4.844	14330	CC(C)=CCC12OCC3CC(C=C4C(=O)c5c(O)cccc5OC134)C2=O	0	16	6	10	14	0.3724	13	0	0	0	0	-0.0929	0.3063	2.82898	0.827	3	0
1098	5.07	8520	Oc1cccc2OC34C5COC3(CC=C)C(=O)C(C5)C=C4C(=O)c12	0	16	6	10	16	0.3724	14	0	0	0	0	-0.0929	-0.5424	2.41937	0.241	1	0
1099	4.65	22400	CC(C)=CCC12OC(C)(C)C3CC(C=C4C(=O)c5c(O)cc(O)cc5OC134)C2=O	0	16	6	10	16	0.5483	14	0	0	0	0	0	0.3257	3.31318	1.623	4	0
1100	4.453	35240	CC(C)=CCC12OCC3CC(C=C4C(=O)c5ccccc5OC134)C2=O	0	16	6	10	14	0.1965	13	0	0	0	0	-0.1858	0.8694	3.12338	1.119	3	0
1101	4.809	15530	CC(C)=CCC12OC(C)(C)C3CC(C=C4C(=O)c5c(O)cccc5OC134)C2=O	0	16	6	10	16	0.3724	14	0	0	0	0	-0.0929	0.2306	3.60758	1.862	4	0
1102	4.262	54680	COc1cccc2OC34C5COC3(CC=C(C)C)C(=O)C(C5)C=C4C(=O)c12	0	16	6	8	16	0.3759	13	0	0	0	0	-0.0927	0.3708	3.63277	1.148	3	0
1103	5.434	3680	C\C(CO)=C/CC12OCC3CC(C=C4C(=O)c5c(O)cccc5OC134)C2=O	0	16	6	11	15	0.3724	13	0	0	0	0	-0.0929	-0.7844	1.80138	-0.843	3	0
1104	5.208	6200	C\C(CCl)=C/CC12OCC3CC(C=C4C(=O)c5c(O)cccc5OC134)C2=O	0	16	6	8	14	0.3724	12	0	0	0	0	-0.0929	-0.238	3.04788	0.589	3	0
1105	4.645	22630	C\C(CC=O)=C/CC12OC(C)(C)C3CC(C=C4C(=O)c5c(O)cccc5OC134)C2=O	0	16	6	9	14	0.3724	12	0	0	0	0	-0.0929	0.0892	3.17668	0.897	3	0
1106	4.552	28030	C=CCC12OCC3CC(C=C4C(=O)c5ccccc5OC134)C2=O	0	16	6	11	16	0.1965	14	0	0	0	0	-0.1858	0.0207	2.34318	0.533	1	0
1107	4.278	52670	CC(=O)Oc1cccc2OC34C5COC3(CC=C(C)C)C(=O)C(C5)C=C4C(=O)c12	0	16	6	7	16	0.3881	13	0	0	0	0	-0.092	0.3414	3.54947	1.018	4	0
1108	4.563	27340	C\C(CO)=C/CC12OC(C)(C)C3CC(C=C4C(=O)c5c(O)cccc5OC134)C2=O	0	16	6	11	16	0.3724	14	0	0	0	0	-0.0929	-0.2019	2.57998	0.034	4	0
1109	4.436	36620	C\C(CC=O)=C/CC12OCC3CC(C4OC44C(=O)c5c(O)cccc5OC134)C2=O	0	16	6	8	14	0.3702	11	0	0	0	0	-0.093	-1.2549	1.68309	-0.64	2	0
1110	4.816	15290	C\C(CCl)=C/CC12OC(C)(C)C3CC(C=C4C(=O)c5c(O)cccc5OC134)C2=O	0	16	6	10	14	0.3724	12	0	0	0	0	-0.0929	1.0027	3.82648	1.308	4	0
1111	7.337	46	CC(C)c1cc(-c2nnn(Cc3ccccc3)c2-c2ccc(cc2)S(C)(=O)=O)c(O)cc1O	0	20	20	8	16	0.6331	12	1	1	20	0	-0.5427	1.6001	6.0484	2.784	3	0
1112	6.529	296	CC(C)c1cc(-c2nn[nH]c2-c2ccccc2)c(O)cc1O	0	14	14	9	14	0.5409	11	1	1	14	0	-0.3334	1.1504	3.69339	3.044	2	0
1113	6.772	169	CC(C)c1cc(-c2nn[nH]c2-c2ccc3OCCOc3c2)c(O)cc1O	0	16	14	7	14	0.8694	14	1	1	14	0	-0.1161	-0.0282	3.96538	2.681	4	0
1114	6.78	166	CC(C)c1cc(-c2nn[nH]c2-c2ccc(cc2)S(C)(=O)=O)c(O)cc1O	0	14	14	8	14	0.6289	14	1	1	14	0	-0.2185	0.3807	4.17769	1.887	2	0
1115	7.367	43	COC(=O)Cn1nnc(c1-c1ccc(cc1)S(C)(=O)=O)-c1cc(C(C)C)c(O)cc1O	0	14	14	8	14	0.6333	12	1	1	14	0	-0.2185	0.1901	4.71118	1.395	3	0
1116	7.367	43	COC(=O)Cn1nnc(c1-c1cccc(c1)S(C)(=O)=O)-c1cc(C(C)C)c(O)cc1O	0	14	14	9	14	0.6357	12	1	1	14	0	-0.2208	0.1901	4.71118	1.395	3	0
1117	7.108	78	COC(=O)Cn1nnc(c1-c1cccc(NS(C)(=O)=O)c1)-c1cc(C(C)C)c(O)cc1O	0	14	14	9	13	0.5955	11	1	1	14	0	-0.2256	-0.3212	4.67918	1.484	3	0
1118	7.319	48	COC(=O)Cn1nnc(c1-c1ccc2OCCOc2c1)-c1cc(C(C)C)c(O)cc1O	0	16	14	9	16	0.8739	13	1	1	14	0	-0.1161	-0.2188	4.49887	2.189	5	0
1119	7.244	57	COC(=O)Cn1nnc(c1-c1ccc(CN2CCCCC2)cc1)-c1cc(C(C)C)c(O)cc1O	0	19	14	9	16	0.5453	15	2	1	14	0	-0.2956	-1.3411	4.87328	3.801	6	0
1120	7.041	91	COC(=O)Cn1nnc(c1-c1ccc(CN2CCOCC2)cc1)-c1cc(C(C)C)c(O)cc1O	0	18	14	11	16	0.5453	14	2	1	14	0	-0.2956	-0.608	3.71958	2.537	8	0
1121	7.149	71	COC(=O)Cn1nnc(c1-c1ccc(OCCN(C)C)cc1)-c1cc(C(C)C)c(O)cc1O	0	14	14	9	14	0.6661	12	1	1	14	0	-0.1813	0.5999	4.16728	2.012	5	0
1122	6.815	153	COC(=O)Cn1nnc(c1-c1ccc(O)c(O)c1)-c1cc(C(C)C)c(O)cc1O	0	14	14	8	14	0.8662	14	1	1	14	0	-0.1165	-0.1664	3.63808	2.186	3	0
1123	6.728	187	CC(C)c1cc(-c2nnn(CC(O)=O)c2-c2ccc(cc2)S(C)(=O)=O)c(O)cc1O	0	14	14	8	14	0.6333	12	1	1	14	0	-0.2185	-0.0609	4.21759	1.074	3	0
1124	6.762	173	CC(C)c1cc(-c2nnn(CC(O)=O)c2-c2cccc(c2)S(C)(=O)=O)c(O)cc1O	0	14	14	6	14	0.6357	10	1	1	14	0	-0.2208	-0.0609	4.21759	1.074	3	0
1125	6.115	767	CC(C)c1cc(-c2nnn(CC(O)=O)c2-c2cccc(NS(C)(=O)=O)c2)c(O)cc1O	0	14	14	8	14	0.5955	13	1	1	14	0	-0.2256	-0.5722	4.18559	1.163	3	0
1126	6.754	176	CC(C)c1cc(-c2nnn(CC(O)=O)c2-c2ccc3OCCOc3c2)c(O)cc1O	0	16	14	8	14	0.8739	12	1	1	14	0	-0.1161	-0.4698	4.00528	1.868	5	0
1127	7.377	42	CCOC(=O)Cn1nnc(c1-c1ccc(cc1)S(C)(=O)=O)-c1cc(C(C)C)c(O)cc1O	0	14	14	10	14	0.6333	12	1	2	14	0	-0.2185	0.4405	5.10128	1.818	5	0
1128	7.276	53	CCOC(=O)Cn1nnc(c1-c1cccc(c1)S(C)(=O)=O)-c1cc(C(C)C)c(O)cc1O	0	14	14	7	14	0.6357	12	1	2	14	0	-0.2208	0.4405	5.10128	1.818	5	0
1129	7.114	77	CCOC(=O)Cn1nnc(c1-c1cccc(NS(C)(=O)=O)c1)-c1cc(C(C)C)c(O)cc1O	0	14	14	10	13	0.5955	11	1	2	14	0	-0.2256	-0.0708	5.06928	1.907	5	0
1130	7.215	61	CCOC(=O)Cn1nnc(c1-c1ccc2OCCOc2c1)-c1cc(C(C)C)c(O)cc1O	0	16	14	8	15	0.8739	12	1	2	14	0	-0.1161	0.0316	4.88897	2.612	7	0
1131	6.866	136	CC(C)c1cc(-c2nnn(CC(N)=O)c2-c2ccc(cc2)S(C)(=O)=O)c(O)cc1O	0	14	14	8	14	0.6332	12	1	1	14	0	-0.2185	-0.4559	3.61829	0.346	3	1
1132	6.873	134	CC(C)c1cc(-c2nnn(CC(N)=O)c2-c2ccc3OCCOc3c2)c(O)cc1O	0	16	14	8	14	0.8738	12	1	1	14	0	-0.1161	-0.8648	3.40598	1.14	5	1
1133	6.67	214	CCc1cc(-c2nnn(CC(=O)OC)c2-c2ccc(cc2)S(C)(=O)=O)c(O)cc1O	0	14	14	8	14	0.6329	12	1	1	14	0	-0.2217	-0.0759	3.74499	0.891	2	0
1134	6.812	154	CCc1cc(-c2nnn(CC(=O)OC)c2-c2cccc(c2)S(C)(=O)=O)c(O)cc1O	0	14	14	8	14	0.6353	12	1	1	14	0	-0.224	-0.0759	3.74499	0.891	2	0
1135	6.735	184	CCc1cc(-c2nnn(CC(=O)OC)c2-c2cccc(NS(C)(=O)=O)c2)c(O)cc1O	0	14	14	8	14	0.5951	12	1	1	14	0	-0.2288	-0.5872	3.71299	0.98	2	0
1136	6.762	173	CCc1cc(-c2nnn(CC(=O)OC)c2-c2ccc3OCCOc3c2)c(O)cc1O	0	16	14	7	14	0.8735	12	1	1	14	0	-0.1193	-0.4848	3.53268	1.685	4	0
1137	6.517	304	CCOC(=O)Cn1nnc(c1-c1ccc(cc1)S(C)(=O)=O)-c1cc(CC)c(O)cc1O	0	14	14	8	14	0.6329	12	1	2	14	0	-0.2217	0.1745	4.54028	1.314	4	0
1138	6.793	161	CCOC(=O)Cn1nnc(c1-c1cccc(c1)S(C)(=O)=O)-c1cc(CC)c(O)cc1O	0	14	14	7	14	0.6353	12	1	2	14	0	-0.224	0.1745	4.54028	1.314	4	0
1139	6.75	178	CCOC(=O)Cn1nnc(c1-c1ccc(CN2CCOCC2)cc1)-c1cc(CC)c(O)cc1O	0	18	14	8	16	0.5449	12	2	2	14	0	-0.2988	-0.6236	3.54868	2.452	9	0
1140	6.328	470	CCc1cc(-c2nnn(CC(N)=O)c2-c2ccc(cc2)S(C)(=O)=O)c(O)cc1O	0	14	14	8	14	0.6328	12	1	1	14	0	-0.2217	-0.7219	3.05729	-0.158	2	1
1141	4.018	96000	CO[C@H]1C[C@H](C)Cc2c(OC)c(O)cc3NC(=O)\C(C)=C\[C@H](O)C[C@H](OC)[C@@H](OC(N)=O)\C(C)=C\[C@H](C)[C@H]1Oc23	0	6	6	2	6	0.6074	4	0	0	0	1	0	0.1831	2.92797	1.141	4	2

## Sheet: Details Model-A
Variable	Coeff.	Std. coeff.	Std. err.	(+/-) Co. int. 95%	p-value
Intercept	3.9031		0.068	0.1335	0
aroCminus_sumpc	0.7138	0.1114	0.1089	0.2136	0
com_ringChyd_4A	0.1006	0.259	0.0065	0.0127	0
faroCN2B	0.4334	0.2994	0.0294	0.0577	0
fringNsp3C5B	0.2663	0.2054	0.0242	0.0475	0
da_amdN_6B	0.5899	0.2259	0.0418	0.0821	0
aroC_aroN_5B	0.0651	0.4598	0.0026	0.005	0
(Fitting criteria)
R2: 0.7789		R2adj: 0.7774		R2-R2adj: 0.0015		LOF: 0.2439
Kxx: 0.2193		Delta K: 0.1219		RMSE tr: 0.4873		MAE tr: 0.4036
RSS tr: 217.3213		CCC tr: 0.8757		s: 0.4892		F: 533.1336
(Internal validation criteria)
Q2loo: 0.7753		R2-Q2loo: 0.0036		RMSE cv: 0.4913		MAE cv: 0.4068
PRESS cv: 220.8387		CCC cv: 0.8737
Q2LMO: 0.7747		R2Yscr: 0.0067		Q2Yscr: -0.0087		RMSE AV Yscr: 1.0330
R2Xrnd:		Q2Xrnd:		R2Yrnd:		Q2Yrnd:
(External validation criteria)
RMSE ext: 0.4735		MAE ext: 0.3829		PRESS ext: 50.6753		R2ext: 0.7788
Q2-F1: 0.7776		Q2-F2: 0.7775		Q2-F3: 0.7913		CCC ext: 0.8764
r2m aver.: 0.6842		r2m delta: 0.1638
Calc. external data regr. angle from diagonal: -6.7271°
Predictions by LOO:
Exp(x) vs. Pred(y): R2: 0.7753	R'2o: 0.7135	k': 0.9938	Clos': 0.0798	r'2m: 0.5825
Pred(x) vs. Exp(y): R2: 0.7753	R2o: 0.7753	k: 0.9999	Clos: 0.0000	r2m: 0.7736
External predictions by model equation:
Exp(x) vs. Pred(y): R2: 0.7788	R'2o: 0.7274	k': 0.9890	Clos': 0.0660	r'2m: 0.6023
Pred(x) vs. Exp(y): R2: 0.7788	R2o: 0.7786	k: 1.0053	Clos: 0.0003	r2m: 0.7661
ID	Name	Status	Exp. endpoint	Pred. by model eq.	Pred.Mod.Eq.Res.	Pred. LOO	Pred. LOO Res.	HAT i/i (h*=0.0230)	Std.Pred.Mod.Eq. Res.	Std.Pred.LOO Res.
1	28137	Prediction	6.678	6.2433	-0.4347	-	-	0.0106	-0.8933	-0.8933
2	28138	Training	5.357	5.966	0.609	5.9698	0.6128	0.0061	1.2487	1.2564
3	28140	Training	6.824	6.1942	-0.6298	6.188	-0.636	0.0097	-1.2937	-1.3064
4	28141	Training	6.292	6.1947	-0.0973	6.1938	-0.0982	0.0097	-0.1998	-0.2018
5	28144	Training	7.155	6.6899	-0.4651	6.6885	-0.4665	0.0031	-0.9522	-0.9551
6	28146	Training	6.921	6.9593	0.0383	6.9596	0.0386	0.0063	0.0786	0.079
7	28163	Training	4.932	5.846	0.914	5.8552	0.9232	0.0099	1.8776	1.8964
8	28164	Training	5.222	5.8504	0.6284	5.8568	0.6348	0.01	1.291	1.3041
9	28178	Training	5.056	4.64	-0.416	4.6358	-0.4202	0.0099	-0.8547	-0.8632
10	28179	Training	5.658	4.614	-1.044	4.6022	-1.0558	0.0111	-2.146	-2.1701
11	28180	Training	5.215	4.5066	-0.7084	4.4988	-0.7162	0.011	-1.4559	-1.4721
12	28181	Prediction	5.18	4.6574	-0.5226	-	-	0.015	-1.0763	-1.0763
13	28182	Training	4.578	5.0646	0.4866	5.0752	0.4972	0.0213	1.0054	1.0273
14	28184	Training	4.818	4.4765	-0.3415	4.4722	-0.3458	0.0126	-0.7024	-0.7114
15	37495	Training	4.818	5.7632	0.9452	5.7678	0.9498	0.0048	1.9368	1.9461
16	37498	Training	6.097	5.8805	-0.2165	5.8793	-0.2177	0.006	-0.4438	-0.4464
17	37660	Training	6.588	6.2882	-0.2998	6.2858	-0.3022	0.0082	-0.6152	-0.6203
18	37662	Training	6.836	7.0445	0.2085	7.0456	0.2096	0.0052	0.4274	0.4296
19	37663	Prediction	6.939	7.1121	0.1731	-	-	0.0062	0.355	0.355
20	37664	Prediction	7.456	6.9438	-0.5122	-	-	0.0048	-1.0496	-1.0496
21	37665	Prediction	7.569	6.8433	-0.7257	-	-	0.0048	-1.4869	-1.4869
22	37666	Training	7.432	7.0445	-0.3875	7.0425	-0.3895	0.0052	-0.7941	-0.7982
23	37667	Training	7.244	7.3134	0.0694	7.3138	0.0698	0.0064	0.1423	0.1432
24	37668	Training	6.848	7.0445	0.1965	7.0456	0.1976	0.0052	0.4028	0.4049
25	37669	Training	6.654	7.0445	0.3905	7.0466	0.3926	0.0052	0.8003	0.8045
26	37670	Training	6	6.8431	0.8431	6.8472	0.8472	0.0048	1.7275	1.7358
27	37671	Prediction	6.636	6.6638	0.0278	-	-	0.0076	0.0571	0.0571
28	37673	Training	6.138	7.0444	0.9064	7.0491	0.9111	0.0052	1.8575	1.8672
29	37674	Training	5.889	7.0445	1.1555	7.0506	1.1616	0.0052	2.3681	2.3805
30	37675	Training	6.366	6.8431	0.4771	6.8454	0.4794	0.0048	0.9776	0.9823
31	37677	Training	5.78	6.9439	1.1639	6.9495	1.1695	0.0048	2.3848	2.3963
32	37681	Training	7.409	6.982	-0.427	6.9797	-0.4293	0.0054	-0.8752	-0.88
33	37682	Training	7.678	6.982	-0.696	6.9782	-0.6998	0.0054	-1.4266	-1.4343
34	37683	Prediction	7.194	6.982	-0.212	-	-	0.0054	-0.4346	-0.4346
35	37684	Training	7.721	6.982	-0.739	6.978	-0.743	0.0054	-1.5147	-1.5229
36	37685	Training	7.553	6.982	-0.571	6.9789	-0.5741	0.0054	-1.1704	-1.1767
37	37686	Training	7.409	6.982	-0.427	6.9797	-0.4293	0.0054	-0.8752	-0.88
38	37687	Training	7.745	6.982	-0.763	6.9778	-0.7672	0.0054	-1.5639	-1.5724
39	37688	Training	6.896	6.982	0.086	6.9824	0.0864	0.0054	0.1762	0.1772
40	37689	Training	6.465	6.8814	0.4164	6.8834	0.4184	0.005	0.8532	0.8575
41	37690	Training	6.622	6.982	0.36	6.9839	0.3619	0.0054	0.7378	0.7418
42	37691	Training	7.495	6.8193	-0.6757	6.8109	-0.6841	0.0122	-1.3897	-1.4069
43	37692	Prediction	7.538	6.9673	-0.5707	-	-	0.0054	-1.1698	-1.1698
44	37694	Prediction	7.699	6.9176	-0.7814	-	-	0.0084	-1.6038	-1.6038
45	37695	Training	7.585	6.9176	-0.6674	6.912	-0.673	0.0084	-1.3698	-1.3814
46	37696	Training	7.585	6.9176	-0.6674	6.9119	-0.6731	0.0084	-1.37	-1.3816
47	37697	Training	7.658	6.957	-0.701	6.9488	-0.7092	0.0115	-1.4413	-1.4581
48	37698	Training	7.854	6.957	-0.897	6.9465	-0.9075	0.0115	-1.8443	-1.8658
49	37699	Training	7.409	7.035	-0.374	7.0316	-0.3774	0.0089	-0.768	-0.7749
50	37700	Prediction	7.854	6.9695	-0.8845	-	-	0.011	-1.8181	-1.8181
51	37701	Training	7.444	7.0554	-0.3886	7.0521	-0.3919	0.0085	-0.7977	-0.8045
52	37702	Prediction	7.456	6.9676	-0.4884	-	-	0.0054	-1.001	-1.001
53	37708	Prediction	7.131	7.1581	0.0271	-	-	0.0146	0.0557	0.0557
54	37710	Training	6.268	6.9673	0.6993	6.9711	0.7031	0.0054	1.4332	1.441
55	37711	Training	5.807	6.9674	1.1604	6.9737	1.1667	0.0054	2.3784	2.3913
56	57697	Training	5.078	5.5734	0.4954	5.5752	0.4972	0.0036	1.0144	1.0181
57	57701	Training	4.301	5.0129	0.7119	5.0198	0.7188	0.0095	1.4622	1.4763
58	57702	Training	5.282	5.3769	0.0949	5.3776	0.0956	0.0082	0.1947	0.1963
59	57703	Prediction	4.301	4.4625	0.1615	-	-	0.0144	0.3325	0.3325
60	57704	Training	4.885	5.0742	0.1892	5.0761	0.1911	0.0096	0.3886	0.3924
61	57705	Prediction	4.301	4.3995	0.0985	-	-	0.0072	0.2022	0.2022
62	57706	Training	5.244	5.4297	0.1857	5.4322	0.1882	0.0131	0.3821	0.3872
63	57708	Training	4.805	5.2603	0.4553	5.2642	0.4592	0.0085	0.9346	0.9426
64	57709	Prediction	5.351	6.054	0.703	-	-	0.0084	1.4431	1.4431
65	57710	Training	4.301	4.7223	0.4213	4.7239	0.4229	0.004	0.8628	0.8662
66	57712	Training	4.832	4.4272	-0.4048	4.4247	-0.4073	0.006	-0.8299	-0.835
67	57713	Training	5.301	4.905	-0.396	4.9024	-0.3986	0.0064	-0.8121	-0.8173
68	57714	Training	4.564	5.0817	0.5177	5.0847	0.5207	0.0057	1.0612	1.0674
69	57715	Training	4.301	4.5363	0.2353	4.5383	0.2373	0.0082	0.483	0.487
70	57716	Training	5.112	4.7379	-0.3741	4.7354	-0.3766	0.0066	-0.7672	-0.7724
71	57717	Training	4.82	5.475	0.655	5.4829	0.6629	0.0119	1.347	1.3632
72	57718	Training	4.301	5.0913	0.7903	5.1011	0.8001	0.0121	1.6254	1.6454
73	57720	Training	4.718	3.7865	-0.9315	3.7712	-0.9468	0.0161	-1.9196	-1.951
74	57722	Training	5.035	4.8911	-0.1439	4.8903	-0.1447	0.0052	-0.295	-0.2965
75	57724	Training	5.581	4.6261	-0.9549	4.6218	-0.9592	0.0045	-1.9562	-1.965
76	57725	Prediction	4.301	4.4373	0.1363	-	-	0.0062	0.2795	0.2795
77	57726	Training	5.476	4.8897	-0.5863	4.8866	-0.5894	0.0052	-1.2015	-1.2078
78	57729	Training	4.676	4.9978	0.3218	4.9997	0.3237	0.006	0.6597	0.6637
79	57730	Prediction	5.193	4.5279	-0.6651	-	-	0.0046	-1.3627	-1.3627
80	57732	Training	4.301	4.8762	0.5752	4.8798	0.5788	0.0062	1.1794	1.1868
81	57734	Training	4.301	4.848	0.547	4.8503	0.5493	0.0041	1.1205	1.1251
82	57736	Prediction	4.676	5.1598	0.4838	-	-	0.0075	0.9926	0.9926
83	57739	Training	4.326	5.0946	0.7686	5.097	0.771	0.0031	1.5735	1.5784
84	57740	Prediction	5.806	5.5523	-0.2537	-	-	0.0039	-0.5196	-0.5196
85	57741	Prediction	5.132	5.015	-0.117	-	-	0.0069	-0.2399	-0.2399
86	57742	Prediction	4.46	4.4974	0.0374	-	-	0.0073	0.0768	0.0768
87	57744	Training	5.179	5.103	-0.076	5.1023	-0.0767	0.008	-0.1561	-0.1573
88	57745	Prediction	5.237	5.345	0.108	-	-	0.0132	0.2222	0.2222
89	57748	Training	4.301	5.14	0.839	5.1509	0.8499	0.0128	1.7261	1.7485
90	57751	Training	4.301	4.9728	0.6718	4.9811	0.6801	0.0122	1.3816	1.3987
91	57753	Prediction	5.471	5.2776	-0.1934	-	-	0.0031	-0.3958	-0.3958
92	57754	Training	4.924	4.8369	-0.0871	4.8362	-0.0878	0.008	-0.1787	-0.1801
93	57756	Training	6.553	5.778	-0.775	5.7745	-0.7785	0.0045	-1.5877	-1.5949
94	57757	Training	4.301	4.953	0.652	4.9577	0.6567	0.0071	1.3376	1.3471
95	57758	Training	4.301	5.1031	0.8021	5.1061	0.8051	0.0037	1.6427	1.6488
96	57759	Training	4.301	4.5132	0.2122	4.5172	0.2162	0.0187	0.4378	0.4461
97	57762	Training	4.301	4.7019	0.4009	4.7037	0.4027	0.0044	0.8212	0.8249
98	57763	Training	4.301	4.7955	0.4945	4.8014	0.5004	0.0119	1.0168	1.0291
99	57766	Training	4.301	4.7697	0.4687	4.7749	0.4739	0.0109	0.9634	0.974
100	57767	Prediction	5.618	5.653	0.035	-	-	0.0073	0.0719	0.0719
101	57769	Training	4.301	4.915	0.614	4.9171	0.6161	0.0035	1.2572	1.2617
102	57770	Training	5.609	5.6249	0.0159	5.625	0.016	0.0038	0.0327	0.0328
103	57773	Prediction	4.746	5.5797	0.8337	-	-	0.0049	1.7084	1.7084
104	57776	Training	4.34	4.8006	0.4606	4.8032	0.4632	0.0055	0.9441	0.9493
105	57777	Training	4.476	4.597	0.121	4.5985	0.1225	0.0119	0.2489	0.2519
106	57778	Training	4.886	5.0394	0.1534	5.0415	0.1555	0.0138	0.3157	0.3201
107	57780	Training	5.953	5.296	-0.657	5.2931	-0.6599	0.0044	-1.3459	-1.3519
108	57782	Training	4.874	5.387	0.513	5.389	0.515	0.0039	1.0505	1.0547
109	57784	Training	4.301	4.0655	-0.2355	4.0624	-0.2386	0.0132	-0.4845	-0.491
110	57785	Training	5.706	6.3942	0.6882	6.4005	0.6945	0.009	1.4131	1.426
111	57789	Training	4.876	5.4855	0.6095	5.4907	0.6147	0.0086	1.2512	1.2619
112	57791	Training	4.709	5.1691	0.4601	5.1764	0.4674	0.0156	0.9478	0.9629
113	57792	Training	5.332	5.078	-0.254	5.0763	-0.2557	0.0067	-0.521	-0.5245
114	57793	Training	4.706	4.9774	0.2714	4.9793	0.2733	0.0071	0.5567	0.5607
115	57797	Training	4.301	4.9241	0.6231	4.9279	0.6269	0.0062	1.2776	1.2855
116	57799	Prediction	4.443	4.9416	0.4986	-	-	0.0057	1.0221	1.0221
117	57801	Prediction	4.868	5.3643	0.4963	-	-	0.0071	1.018	1.018
118	57802	Training	4.95	5.4082	0.4582	5.4097	0.4597	0.0032	0.9381	0.9411
119	57805	Training	4.632	4.7993	0.1673	4.8022	0.1702	0.0167	0.3449	0.3507
120	57807	Prediction	4.491	5.162	0.671	-	-	0.0031	1.3736	1.3736
121	57810	Prediction	4.301	4.7179	0.4169	-	-	0.0057	0.8545	0.8545
122	57811	Training	5.105	4.8668	-0.2382	4.8651	-0.2399	0.0069	-0.4886	-0.492
123	57812	Training	4.301	4.9164	0.6154	4.9202	0.6192	0.0062	1.2618	1.2697
124	57813	Training	4.301	4.7915	0.4905	4.796	0.495	0.0091	1.0072	1.0164
125	57814	Prediction	4.963	4.7284	-0.2346	-	-	0.0047	-0.4806	-0.4806
126	57815	Training	4.618	5.2699	0.6519	5.2727	0.6547	0.0044	1.3354	1.3413
127	57816	Training	4.42	4.3768	-0.0432	4.3764	-0.0436	0.008	-0.0887	-0.0894
128	57817	Training	4.301	4.4082	0.1072	4.4088	0.1078	0.0059	0.2198	0.2211
129	57818	Training	4.301	5.0353	0.7343	5.0408	0.7398	0.0075	1.5066	1.518
130	57819	Training	4.301	4.487	0.186	4.4884	0.1874	0.0074	0.3817	0.3845
131	57821	Training	4.387	4.5068	0.1198	4.5076	0.1206	0.0068	0.2457	0.2474
132	57822	Training	4.301	4.7308	0.4298	4.7371	0.4361	0.0146	0.885	0.8981
133	57824	Prediction	4.301	4.4865	0.1855	-	-	0.0049	0.3801	0.3801
134	57826	Training	4.715	5.3554	0.6404	5.3629	0.6479	0.0116	1.3166	1.332
135	57828	Training	4.301	5.0148	0.7138	5.0191	0.7181	0.006	1.4634	1.4722
136	57829	Training	4.301	4.7519	0.4509	4.754	0.453	0.0045	0.9238	0.9279
137	57830	Training	4.648	4.9318	0.2838	4.9331	0.2851	0.0046	0.5814	0.5841
138	57831	Training	4.301	4.6857	0.3847	4.6887	0.3877	0.0079	0.7894	0.7957
139	57832	Training	4.301	4.9752	0.6742	4.9816	0.6806	0.0094	1.3845	1.3977
140	57838	Training	4.301	4.6284	0.3274	4.6297	0.3287	0.0041	0.6706	0.6734
141	57839	Training	4.686	4.8471	0.1611	4.8486	0.1626	0.0091	0.3309	0.3339
142	57840	Training	4.301	5.147	0.846	5.1496	0.8486	0.0031	1.7319	1.7372
143	57841	Training	6.131	5.6358	-0.4952	5.6337	-0.4973	0.0043	-1.0143	-1.0186
144	57842	Training	4.301	4.6813	0.3803	4.6835	0.3825	0.0057	0.7796	0.7841
145	57843	Training	4.686	4.983	0.297	4.9848	0.2988	0.0061	0.6089	0.6126
146	57844	Training	4.565	4.6752	0.1102	4.6757	0.1107	0.0043	0.2258	0.2268
147	57845	Training	4.301	4.3851	0.0841	4.3856	0.0846	0.0058	0.1724	0.1734
148	57846	Training	4.301	5.0649	0.7639	5.0704	0.7694	0.0071	1.567	1.5782
149	57851	Training	4.301	5.2221	0.9211	5.2257	0.9247	0.004	1.8864	1.8939
150	57855	Prediction	4.952	5.8061	0.8541	-	-	0.0069	1.7519	1.7519
151	57864	Prediction	4.301	4.5209	0.2199	-	-	0.0064	0.451	0.451
152	57866	Training	4.301	4.5284	0.2274	4.5298	0.2288	0.0062	0.4663	0.4692
153	57867	Training	4.301	4.7441	0.4431	4.7461	0.4451	0.0046	0.9078	0.912
154	57868	Training	4.301	4.3951	0.0941	4.3958	0.0948	0.0074	0.1931	0.1945
155	57869	Training	4.301	4.5349	0.2339	4.5363	0.2353	0.006	0.4796	0.4825
156	57870	Prediction	4.301	4.4608	0.1598	-	-	0.0084	0.328	0.328
157	57872	Training	4.301	4.8512	0.5502	4.8541	0.5531	0.0051	1.1276	1.1334
158	57873	Training	4.301	4.7472	0.4462	4.7501	0.4491	0.0064	0.9151	0.921
159	57876	Prediction	4.301	5.0858	0.7848	-	-	0.0094	1.6117	1.6117
160	57877	Training	4.301	4.5524	0.2514	4.5538	0.2528	0.0056	0.5153	0.5182
161	57878	Training	4.301	4.6069	0.3059	4.6084	0.3074	0.0047	0.6268	0.6298
162	57881	Training	4.301	4.5346	0.2336	4.5369	0.2359	0.0097	0.4799	0.4846
163	57882	Training	4.301	4.5341	0.2331	4.5363	0.2353	0.0097	0.4787	0.4834
164	57883	Prediction	4.301	4.4366	0.1356	-	-	0.015	0.2792	0.2792
165	57884	Prediction	4.301	4.7721	0.4711	-	-	0.0095	0.9675	0.9675
166	57887	Training	4.301	4.7946	0.4936	4.7973	0.4963	0.0056	1.0117	1.0173
167	57888	Training	4.301	4.7783	0.4773	4.7811	0.4801	0.0058	0.9784	0.9841
168	57889	Training	4.301	4.6082	0.3072	4.6096	0.3086	0.0046	0.6293	0.6322
169	57894	Prediction	4.301	5.1083	0.8073	-	-	0.0043	1.6537	1.6537
170	57895	Training	4.301	4.6383	0.3373	4.64	0.339	0.0049	0.6912	0.6946
171	57896	Training	4.301	4.5209	0.2199	4.5223	0.2213	0.0064	0.451	0.4539
172	57899	Prediction	4.903	5.6363	0.7333	-	-	0.0054	1.5029	1.5029
173	57903	Training	4.301	5.1812	0.8802	5.1841	0.8831	0.0033	1.8021	1.8081
174	57905	Training	4.301	4.733	0.432	4.7351	0.4341	0.0046	0.8852	0.8893
175	57907	Training	5.807	5.7512	-0.0558	5.7506	-0.0564	0.011	-0.1146	-0.1159
176	57913	Training	5.807	5.2191	-0.5879	5.2168	-0.5902	0.0039	-1.2041	-1.2088
177	57915	Training	4.301	5.1051	0.8041	5.1077	0.8067	0.0031	1.6462	1.6514
178	57916	Training	4.301	5.126	0.825	5.1287	0.8277	0.0034	1.6891	1.6948
179	57918	Training	4.301	5.1571	0.8561	5.1604	0.8594	0.0038	1.7532	1.76
180	57919	Training	4.301	5.1439	0.8429	5.147	0.846	0.0036	1.7261	1.7324
181	57920	Training	5.807	4.9335	-0.8735	4.9281	-0.8789	0.0061	-1.7909	-1.8019
182	57921	Training	4.301	4.6963	0.3953	4.6994	0.3984	0.0078	0.8113	0.8176
183	57922	Training	4.301	4.9168	0.6158	4.9207	0.6197	0.0062	1.2627	1.2706
184	57924	Training	4.301	4.4066	0.1056	4.4071	0.1061	0.0053	0.2163	0.2175
185	57927	Training	5.504	5.3169	-0.1871	5.3162	-0.1878	0.0036	-0.3831	-0.3845
186	57929	Training	5.807	4.7177	-1.0893	4.7125	-1.0945	0.0048	-2.2319	-2.2426
187	57930	Training	4.301	5.0642	0.7632	5.0744	0.7734	0.0132	1.5705	1.5914
188	57934	Training	5.807	4.5934	-1.2136	4.5879	-1.2191	0.0045	-2.4863	-2.4975
189	57938	Training	4.301	4.7379	0.4369	4.7399	0.4389	0.0046	0.8951	0.8993
190	57939	Prediction	4.301	4.8579	0.5569	-	-	0.0046	1.1409	1.1409
191	57940	Training	4.301	4.6959	0.3949	4.6997	0.3987	0.0095	0.8111	0.8189
192	57941	Training	4.301	4.5953	0.2943	4.5987	0.2977	0.0114	0.605	0.612
193	57942	Training	4.301	4.6566	0.3556	4.6587	0.3577	0.0058	0.729	0.7333
194	57943	Training	4.301	5.1651	0.8641	5.1689	0.8679	0.0044	1.7701	1.778
195	57944	Training	4.301	4.7314	0.4304	4.7334	0.4324	0.0046	0.8818	0.8859
196	57945	Training	4.301	4.6959	0.3949	4.6997	0.3987	0.0095	0.8111	0.8189
197	57946	Training	4.301	5.0576	0.7566	5.0603	0.7593	0.0035	1.5493	1.5547
198	57947	Training	4.301	4.8669	0.5659	4.8696	0.5686	0.0048	1.1595	1.1651
199	57948	Training	4.301	4.9844	0.6834	4.9873	0.6863	0.0043	1.3999	1.4059
200	57949	Training	4.301	4.5746	0.2736	4.5759	0.2749	0.0044	0.5606	0.5631
201	57950	Training	4.301	4.4847	0.1837	4.4859	0.1849	0.007	0.3767	0.3794
202	57951	Training	4.301	4.8087	0.5077	4.8119	0.5109	0.0063	1.0411	1.0477
203	57954	Prediction	4.301	4.8501	0.5491	-	-	0.0064	1.1259	1.1259
204	57955	Training	4.301	5.0086	0.7076	5.0142	0.7132	0.0079	1.4521	1.4637
205	57957	Training	4.301	4.9086	0.6076	4.9131	0.6121	0.0074	1.2465	1.2559
206	57959	Training	4.301	4.5303	0.2293	4.5329	0.2319	0.0113	0.4713	0.4767
207	59335	Training	3.456	4.2995	0.8435	4.3111	0.8551	0.0136	1.736	1.7599
208	59337	Training	5.807	5.4637	-0.3433	5.4623	-0.3447	0.0041	-0.7031	-0.7059
209	59338	Training	6.046	6.5169	0.4709	6.5222	0.4762	0.0112	0.968	0.979
210	59342	Training	5.244	5.6936	0.4496	5.6951	0.4511	0.0032	0.9206	0.9235
211	59343	Training	6.143	5.8663	-0.2767	5.8654	-0.2776	0.003	-0.5665	-0.5682
212	59344	Prediction	6.469	5.8172	-0.6518	-	-	0.0027	-1.334	-1.334
213	59345	Training	6.523	6.3085	-0.2145	6.3063	-0.2167	0.0101	-0.4407	-0.4452
214	59346	Prediction	6.638	6.0176	-0.6204	-	-	0.0037	-1.2704	-1.2704
215	59355	Training	6.754	6.4831	-0.2709	6.4808	-0.2732	0.0083	-0.5561	-0.5608
216	59356	Training	7.06	6.4831	-0.5769	6.4782	-0.5818	0.0083	-1.1842	-1.1941
217	90042	Training	5.077	5.8535	0.7765	5.8566	0.7796	0.004	1.5904	1.5968
218	90043	Prediction	6.082	5.5375	-0.5445	-	-	0.0064	-1.1166	-1.1166
219	90045	Training	5.233	5.8244	0.5914	5.8277	0.5947	0.0054	1.2122	1.2188
220	90046	Training	4.776	5.5687	0.7927	5.5936	0.8176	0.0304	1.6455	1.6972
221	90047	Prediction	5.599	5.2498	-0.3492	-	-	0.0073	-0.7164	-0.7164
222	90050	Training	4.452	4.8235	0.3715	4.8269	0.3749	0.0091	0.7628	0.7698
223	90051	Training	5.34	5.366	0.026	5.3661	0.0261	0.0047	0.0533	0.0535
224	90052	Training	6.138	5.3206	-0.8174	5.3182	-0.8198	0.003	-1.6732	-1.6782
225	90053	Prediction	5.184	5.0761	-0.1079	-	-	0.0071	-0.2213	-0.2213
226	90054	Training	5.97	4.8223	-1.1477	4.8167	-1.1533	0.0049	-2.3516	-2.3631
227	90055	Training	5.426	5.8393	0.4133	5.8495	0.4235	0.0242	0.8551	0.8764
228	90056	Training	5.028	5.1465	0.1185	5.1474	0.1194	0.0082	0.2431	0.2451
229	90058	Training	5.142	4.9905	-0.1515	4.9898	-0.1522	0.0043	-0.3104	-0.3117
230	90059	Training	5.153	4.7026	-0.4504	4.7006	-0.4524	0.0044	-0.9227	-0.9268
231	90062	Prediction	5.227	5.3859	0.1589	-	-	0.0058	0.3257	0.3257
232	90064	Prediction	5.621	4.5931	-1.0279	-	-	0.0048	-2.1062	-2.1062
233	90065	Training	5.612	5.9552	0.3432	5.9562	0.3442	0.0029	0.7026	0.7047
234	90066	Training	5.536	4.5979	-0.9381	4.5904	-0.9456	0.0079	-1.9252	-1.9404
235	90067	Training	5.416	4.9026	-0.5134	4.9006	-0.5154	0.0039	-1.0515	-1.0556
236	90069	Training	4.75	4.6319	-0.1181	4.6312	-0.1188	0.0058	-0.2421	-0.2435
237	90070	Training	5.671	4.3564	-1.3146	4.3448	-1.3262	0.0088	-2.6989	-2.7229
238	90074	Training	5.287	4.5912	-0.6958	4.5795	-0.7075	0.0165	-1.4342	-1.4583
239	90075	Training	5.794	5.4678	-0.3262	5.4637	-0.3303	0.0123	-0.671	-0.6794
240	90077	Training	5.584	4.9364	-0.6476	4.932	-0.652	0.0068	-1.3282	-1.3372
241	90078	Training	4.536	4.7573	0.2213	4.7593	0.2233	0.0091	0.4543	0.4585
242	90079	Training	5.515	5.1597	-0.3553	5.1565	-0.3585	0.0087	-0.7295	-0.736
243	90080	Training	5.426	4.595	-0.831	4.5913	-0.8347	0.0045	-1.7024	-1.7101
244	90081	Training	5.135	4.5905	-0.5445	4.5879	-0.5471	0.0049	-1.1157	-1.1211
245	90082	Prediction	5.017	5.9124	0.8954	-	-	0.0037	1.8336	1.8336
246	90083	Training	6.629	5.8796	-0.7494	5.8693	-0.7597	0.0136	-1.5423	-1.5635
247	90084	Training	5.783	4.8891	-0.8939	4.8844	-0.8986	0.0052	-1.832	-1.8416
248	90085	Training	5.194	5.1993	0.0053	5.1994	0.0054	0.0066	0.011	0.011
249	90086	Training	5.446	5.372	-0.074	5.3716	-0.0744	0.0044	-0.1517	-0.1524
250	90087	Training	5.622	6.2878	0.6658	6.3028	0.6808	0.0221	1.3762	1.4073
251	90088	Training	5.064	5.1076	0.0436	5.1079	0.0439	0.0063	0.0894	0.0899
252	90091	Training	5.007	5.3319	0.3249	5.3363	0.3293	0.0132	0.6686	0.6776
253	90092	Training	5.793	4.8982	-0.8948	4.8897	-0.9033	0.0094	-1.8377	-1.8551
254	90093	Training	5.601	5.4868	-0.1142	5.4864	-0.1146	0.0035	-0.2339	-0.2347
255	90094	Training	5.708	5.1109	-0.5971	5.1068	-0.6012	0.0069	-1.2246	-1.2331
256	90095	Training	6.056	5.372	-0.684	5.3689	-0.6871	0.0044	-1.4013	-1.4075
257	90096	Training	5.179	4.4427	-0.7363	4.4383	-0.7407	0.006	-1.5095	-1.5186
258	90098	Prediction	4.943	5.1071	0.1641	-	-	0.0051	0.3363	0.3363
259	90099	Training	5.879	4.7181	-1.1609	4.7073	-1.1717	0.0092	-2.384	-2.4062
260	90101	Training	5.429	5.3084	-0.1206	5.308	-0.121	0.0035	-0.247	-0.2479
261	90104	Prediction	4.631	5.2077	0.5767	-	-	0.0041	1.1813	1.1813
262	90105	Training	4.989	4.5492	-0.4398	4.5472	-0.4418	0.0045	-0.901	-0.905
263	90107	Prediction	5.47	4.7074	-0.7626	-	-	0.0075	-1.5646	-1.5646
264	90109	Prediction	5.641	4.6526	-0.9884	-	-	0.0043	-2.0248	-2.0248
265	90110	Prediction	5.296	5.0641	-0.2319	-	-	0.0038	-0.4749	-0.4749
266	90111	Training	5.29	5.1251	-0.1649	5.1245	-0.1655	0.0039	-0.3377	-0.339
267	90112	Prediction	5.243	5.3266	0.0836	-	-	0.0048	0.1713	0.1713
268	90113	Training	5.049	5.193	0.144	5.1947	0.1457	0.0118	0.296	0.2995
269	90114	Training	5.094	5.1826	0.0886	5.1832	0.0892	0.0066	0.1817	0.1829
270	90116	Training	5.658	5.3225	-0.3355	5.3215	-0.3365	0.003	-0.6868	-0.6889
271	90117	Training	5.563	5.3835	-0.1795	5.3828	-0.1802	0.0038	-0.3676	-0.369
272	90118	Training	5.857	4.9475	-0.9095	4.941	-0.916	0.0071	-1.8657	-1.8791
273	90119	Training	4.918	5.089	0.171	5.0895	0.1715	0.0031	0.35	0.3511
274	90120	Training	5.333	4.8049	-0.5281	4.7997	-0.5333	0.0097	-1.0848	-1.0954
275	90122	Training	5.095	5.4182	0.3232	5.4198	0.3248	0.0048	0.6622	0.6655
276	90124	Prediction	5.797	5.08	-0.717	-	-	0.0049	-1.4693	-1.4693
277	90126	Training	5.555	5.2991	-0.2559	5.2974	-0.2576	0.0065	-0.5249	-0.5284
278	90127	Prediction	5.428	4.7899	-0.6381	-	-	0.0089	-1.3101	-1.3101
279	90129	Training	5.493	5.5489	0.0559	5.5493	0.0563	0.0071	0.1146	0.1154
280	90130	Training	5.092	5.4646	0.3726	5.467	0.375	0.0063	0.764	0.7689
281	90131	Training	4.679	5.1929	0.5139	5.1971	0.5181	0.008	1.0547	1.0632
282	90132	Training	5.264	5.4989	0.2349	5.506	0.242	0.0294	0.4873	0.502
283	90133	Prediction	5.357	4.7571	-0.5999	-	-	0.0077	-1.2309	-1.2309
284	90134	Training	5.483	4.772	-0.711	4.7659	-0.7171	0.0085	-1.4595	-1.472
285	90135	Training	6.363	5.5227	-0.8403	5.5195	-0.8435	0.0037	-1.7209	-1.7273
286	90137	Training	5.527	5.3514	-0.1756	5.3502	-0.1768	0.0068	-0.3602	-0.3627
287	90138	Prediction	5.275	4.843	-0.432	-	-	0.0073	-0.8862	-0.8862
288	90139	Training	5.204	4.8413	-0.3627	4.8369	-0.3671	0.0119	-0.7459	-0.7549
289	90141	Training	5.823	4.8123	-1.0107	4.804	-1.019	0.0082	-2.0744	-2.0915
290	90143	Training	5.097	5.3943	0.2973	5.3952	0.2982	0.003	0.6086	0.6104
291	90145	Training	5.418	5.6161	0.1981	5.6182	0.2002	0.0108	0.4071	0.4115
292	90146	Training	4.991	4.6864	-0.3046	4.6846	-0.3064	0.0059	-0.6244	-0.6281
293	90147	Training	5.881	4.9777	-0.9033	4.9744	-0.9066	0.0036	-1.8498	-1.8564
294	90148	Training	4.968	4.3622	-0.6058	4.357	-0.611	0.0086	-1.2436	-1.2543
295	90151	Training	5.261	5.325	0.064	5.3259	0.0649	0.0129	0.1317	0.1335
296	90152	Prediction	5.892	4.6374	-1.2546	-	-	0.0131	-2.5814	-2.5814
297	90153	Training	5.775	4.7134	-1.0616	4.699	-1.076	0.0134	-2.1846	-2.2141
298	90155	Training	5.899	4.6192	-1.2798	4.6011	-1.2979	0.0139	-2.6343	-2.6716
299	90157	Training	5.31	5.9903	0.6803	5.9942	0.6842	0.0057	1.3945	1.4025
300	90158	Prediction	5.977	5.7304	-0.2466	-	-	0.0045	-0.5053	-0.5053
301	90159	Prediction	5.166	5.1616	-0.0044	-	-	0.0183	-0.0092	-0.0092
302	90160	Training	5.758	4.66	-1.098	4.6553	-1.1027	0.0043	-2.2491	-2.2589
303	90163	Training	6.044	5.5496	-0.4944	5.5468	-0.4972	0.0058	-1.0134	-1.0193
304	90165	Prediction	6.037	4.8018	-1.2352	-	-	0.0134	-2.542	-2.542
305	90166	Training	5.376	4.7435	-0.6325	4.7375	-0.6385	0.0094	-1.299	-1.3113
306	90167	Training	5.319	5.0586	-0.2604	5.0569	-0.2621	0.0067	-0.534	-0.5376
307	90168	Training	5.91	5.3178	-0.5922	5.3148	-0.5952	0.0051	-1.2136	-1.2198
308	231107	Training	8.301	7.6561	-0.6449	7.6508	-0.6502	0.0081	-1.3236	-1.3344
309	255930	Training	6.921	6.6999	-0.2211	6.699	-0.222	0.0042	-0.4528	-0.4547
310	255931	Prediction	6.886	6.6997	-0.1863	-	-	0.0042	-0.3816	-0.3816
311	255932	Training	6.77	6.8003	0.0303	6.8005	0.0305	0.0041	0.0622	0.0624
312	255938	Training	6.367	6.7954	0.4284	6.7967	0.4297	0.003	0.8771	0.8798
313	255943	Training	6.745	6.4335	-0.3115	6.4321	-0.3129	0.0043	-0.6382	-0.6409
314	255944	Training	6.31	6.4985	0.1885	6.4995	0.1895	0.0055	0.3863	0.3885
315	255945	Training	6.638	6.5341	-0.1039	6.5336	-0.1044	0.0043	-0.2129	-0.2138
316	255946	Training	5.896	6.4985	0.6025	6.5018	0.6058	0.0055	1.2349	1.2417
317	255947	Training	6.62	6.5991	-0.0209	6.599	-0.021	0.0047	-0.0428	-0.043
318	255948	Training	6.398	6.657	0.259	6.6592	0.2612	0.0082	0.5316	0.536
319	255949	Training	6.495	6.5991	0.1041	6.5996	0.1046	0.0047	0.2133	0.2143
320	255950	Prediction	6.481	6.4335	-0.0475	-	-	0.0043	-0.0974	-0.0974
321	255951	Training	5.943	6.2872	0.3442	6.2896	0.3466	0.0068	0.7059	0.7108
322	255952	Training	6.244	6.6056	0.3616	6.6098	0.3658	0.0114	0.7435	0.7521
323	255953	Training	5.824	6.671	0.847	6.6807	0.8567	0.0113	1.7412	1.761
324	255956	Prediction	6.292	6.5234	0.2314	-	-	0.0043	0.4741	0.4741
325	255957	Training	6.569	6.9464	0.3774	6.9483	0.3793	0.005	0.7733	0.7772
326	255958	Training	6.921	6.8478	-0.0732	6.8474	-0.0736	0.0047	-0.15	-0.1508
327	255959	Training	7	6.7615	-0.2385	6.7604	-0.2396	0.0047	-0.4887	-0.491
328	255960	Prediction	7.046	6.913	-0.133	-	-	0.0105	-0.2733	-0.2733
329	255961	Training	6.824	6.8622	0.0382	6.8624	0.0384	0.0045	0.0782	0.0786
330	255962	Training	6.456	6.7451	0.2891	6.7466	0.2906	0.0049	0.5925	0.5954
331	255964	Prediction	6.337	6.8458	0.5088	-	-	0.0048	1.0424	1.0424
332	255965	Prediction	5.863	6.6445	0.7815	-	-	0.0054	1.6018	1.6018
333	255966	Training	6.222	6.8458	0.6238	6.8488	0.6268	0.0048	1.2781	1.2842
334	255967	Training	6.215	6.7451	0.5301	6.7478	0.5328	0.0049	1.0863	1.0917
335	255968	Training	6.328	6.7451	0.4171	6.7472	0.4192	0.0049	0.8548	0.859
336	255969	Training	6.377	6.9464	0.5694	6.9492	0.5722	0.005	1.1668	1.1726
337	255970	Training	6.444	6.84	0.396	6.8419	0.3979	0.0049	0.8114	0.8154
338	255971	Prediction	6.638	6.9484	0.3104	-	-	0.0049	0.636	0.636
339	255972	Training	6.602	6.4809	-0.1211	6.4803	-0.1217	0.0048	-0.2482	-0.2494
340	255973	Training	6.585	6.8478	0.2628	6.849	0.264	0.0047	0.5384	0.541
341	255974	Training	6.229	6.5815	0.3525	6.5832	0.3542	0.0048	0.7223	0.7257
342	255975	Training	6.469	6.7471	0.2781	6.7485	0.2795	0.0049	0.5699	0.5727
343	255976	Training	6.509	6.8478	0.3388	6.8494	0.3404	0.0047	0.6941	0.6974
344	255977	Training	6.721	6.3328	-0.3882	6.331	-0.39	0.0046	-0.7953	-0.799
345	255978	Training	6.745	6.5345	-0.2105	6.5336	-0.2114	0.0043	-0.4312	-0.433
346	255980	Training	6.602	6.3328	-0.2692	6.3316	-0.2704	0.0046	-0.5515	-0.554
347	255981	Training	6.328	6.2929	-0.0351	6.2927	-0.0353	0.005	-0.072	-0.0724
348	255982	Prediction	5.987	6.494	0.507	-	-	0.0046	1.0388	1.0388
349	255983	Prediction	6.081	6.2931	0.2121	-	-	0.005	0.4346	0.4346
350	255984	Training	6.398	7.1878	0.7898	7.1964	0.7984	0.0109	1.6232	1.641
351	255985	Training	7	7.2549	0.2549	7.2574	0.2574	0.0098	0.5236	0.5288
352	255986	Training	7	7.2719	0.2719	7.2747	0.2747	0.0102	0.5586	0.5643
353	255987	Prediction	6.62	7.2559	0.6359	-	-	0.0108	1.307	1.307
354	255988	Training	6.854	7.2549	0.4009	7.2589	0.4049	0.0098	0.8235	0.8317
355	255989	Training	6.167	6.7364	0.5694	6.7384	0.5714	0.0037	1.1659	1.1702
356	255990	Training	7.155	7.1909	0.0359	7.1913	0.0363	0.0102	0.0737	0.0745
357	255991	Prediction	6.638	6.7526	0.1146	-	-	0.004	0.2348	0.2348
358	255992	Training	6.886	6.6981	-0.1879	6.6974	-0.1886	0.0038	-0.3849	-0.3863
359	255993	Training	6.495	7.3498	0.8548	7.3602	0.8652	0.012	1.7579	1.7793
360	255994	Training	6.328	6.334	0.006	6.3341	0.0061	0.0054	0.0124	0.0125
361	255995	Training	7.222	6.5974	-0.6246	6.5948	-0.6272	0.0041	-1.2793	-1.2846
362	255996	Training	6.62	6.7345	0.1145	6.7351	0.1151	0.0051	0.2347	0.2359
363	255997	Training	6.284	6.3205	0.0365	6.3207	0.0367	0.0055	0.0749	0.0753
364	255999	Training	6.658	6.3118	-0.3462	6.3099	-0.3481	0.0052	-0.7096	-0.7133
365	256001	Training	6.921	6.4593	-0.4617	6.4573	-0.4637	0.0042	-0.9458	-0.9498
366	256002	Training	6.921	6.2956	-0.6254	6.2926	-0.6284	0.0048	-1.2814	-1.2876
367	256003	Training	6.854	6.3966	-0.4574	6.3945	-0.4595	0.0046	-0.9371	-0.9414
368	256004	Training	6.469	6.331	-0.138	6.3302	-0.1388	0.0058	-0.283	-0.2846
369	256005	Prediction	6.699	6.3224	-0.3766	-	-	0.0055	-0.7719	-0.7719
370	256006	Training	6.745	6.4968	-0.2482	6.4956	-0.2494	0.0048	-0.5085	-0.511
371	256008	Training	6.721	6.6981	-0.0229	6.698	-0.023	0.0038	-0.047	-0.0471
372	256009	Training	6.602	6.5974	-0.0046	6.5974	-0.0046	0.0041	-0.0093	-0.0094
373	256010	Training	6.585	6.5974	0.0124	6.5975	0.0125	0.0041	0.0255	0.0256
374	256011	Training	6.31	6.5974	0.2874	6.5986	0.2886	0.0041	0.5888	0.5912
375	256012	Training	6.796	6.3312	-0.4648	6.3285	-0.4675	0.0058	-0.9529	-0.9584
376	256013	Training	6.678	6.1999	-0.4781	6.1965	-0.4815	0.0071	-0.9808	-0.9878
377	256014	Training	6.699	6.7545	0.0555	6.7549	0.0559	0.0081	0.1138	0.1147
378	256015	Training	6.745	6.4882	-0.2568	6.487	-0.258	0.0047	-0.5262	-0.5286
379	256016	Training	6.745	6.5888	-0.1562	6.5882	-0.1568	0.004	-0.3199	-0.3212
380	256017	Training	6.721	6.6894	-0.0316	6.6893	-0.0317	0.0036	-0.0647	-0.0649
381	256018	Prediction	6.456	6.753	0.297	-	-	0.0115	0.6105	0.6105
382	256019	Training	6.638	7.371	0.733	7.3762	0.7382	0.007	1.5036	1.5141
383	256020	Training	6.638	6.9391	0.3011	6.9422	0.3042	0.0103	0.6186	0.6251
384	256021	Training	7.046	6.3389	-0.7071	6.3346	-0.7114	0.006	-1.4498	-1.4585
385	256022	Training	6.538	6.3015	-0.2365	6.3003	-0.2377	0.005	-0.4847	-0.4871
386	256023	Training	6.161	6.3426	0.1816	6.3437	0.1827	0.0061	0.3723	0.3746
387	256024	Training	6.155	6.3426	0.1876	6.3438	0.1888	0.0061	0.3846	0.387
388	256025	Training	6.921	6.6057	-0.3153	6.6043	-0.3167	0.0043	-0.646	-0.6488
389	256026	Training	6.796	6.7083	-0.0877	6.7079	-0.0881	0.004	-0.1797	-0.1804
390	256027	Prediction	6.699	6.2406	-0.4584	-	-	0.0067	-0.9401	-0.9401
391	256028	Training	6.398	6.3552	-0.0428	6.355	-0.043	0.0044	-0.0877	-0.088
392	256029	Training	6.886	6.3574	-0.5286	6.3551	-0.5309	0.0045	-1.0829	-1.0877
393	256030	Training	6.553	6.3596	-0.1934	6.3588	-0.1942	0.0045	-0.3961	-0.3979
394	256031	Training	6.721	6.36	-0.361	6.3584	-0.3626	0.0045	-0.7396	-0.7429
395	256032	Training	6.244	6.5608	0.3168	6.5623	0.3183	0.0047	0.6492	0.6522
396	256033	Training	6.119	6.6615	0.5425	6.6636	0.5446	0.0039	1.111	1.1154
397	256034	Training	6.387	6.6615	0.2745	6.6625	0.2755	0.0039	0.5621	0.5643
398	256035	Training	6.921	6.4029	-0.5181	6.4002	-0.5208	0.0052	-1.0618	-1.0673
399	256036	Training	6.77	6.5974	-0.1726	6.5967	-0.1733	0.0041	-0.3534	-0.3549
400	256037	Training	6.377	6.6981	0.3211	6.6993	0.3223	0.0038	0.6575	0.66
401	256038	Training	6.201	6.3205	0.1195	6.3212	0.1202	0.0055	0.245	0.2464
402	256039	Training	6.114	6.4968	0.3828	6.4987	0.3847	0.0048	0.7844	0.7882
403	256040	Training	6.092	6.5974	0.5054	6.5995	0.5075	0.0041	1.0353	1.0396
404	256041	Training	6.398	6.8282	0.4302	6.8312	0.4332	0.0071	0.8824	0.8887
405	256042	Training	6.409	6.2716	-0.1374	6.2708	-0.1382	0.0053	-0.2816	-0.2831
406	256043	Training	6.032	6.8052	0.7732	6.8122	0.7802	0.009	1.5876	1.602
407	256044	Training	6.18	6.6039	0.4239	6.6088	0.4288	0.0113	0.8715	0.8814
408	256045	Training	5.996	6.7045	0.7085	6.7117	0.7157	0.01	1.4556	1.4703
409	256046	Training	6.886	6.2199	-0.6661	6.2158	-0.6702	0.0061	-1.3657	-1.374
410	256047	Training	6.854	6.2912	-0.5628	6.2885	-0.5655	0.0047	-1.1531	-1.1586
411	256048	Training	6.959	6.2934	-0.6656	6.2902	-0.6688	0.0048	-1.3638	-1.3703
412	256049	Training	7.155	6.5599	-0.5951	6.5578	-0.5972	0.0035	-1.2185	-1.2228
413	256050	Prediction	6.886	6.331	-0.555	-	-	0.0058	-1.1378	-1.1378
414	256051	Prediction	7	6.3224	-0.6776	-	-	0.0055	-1.3889	-1.3889
415	256052	Prediction	6.678	6.3227	-0.3553	-	-	0.0055	-0.7283	-0.7283
416	256053	Training	6.796	6.6981	-0.0979	6.6977	-0.0983	0.0038	-0.2006	-0.2013
417	256054	Training	6.77	6.5974	-0.1726	6.5967	-0.1733	0.0041	-0.3534	-0.3549
418	256055	Training	6.959	6.5888	-0.3702	6.5873	-0.3717	0.004	-0.7582	-0.7612
419	256056	Prediction	7	6.5888	-0.4112	-	-	0.004	-0.8422	-0.8422
420	256057	Training	6.959	6.7545	-0.2045	6.7528	-0.2062	0.0081	-0.4198	-0.4232
421	256058	Training	6.921	6.7545	-0.1665	6.7531	-0.1679	0.0081	-0.3418	-0.3446
422	256059	Training	6.854	6.8551	0.0011	6.8551	0.0011	0.0073	0.0022	0.0022
423	256060	Training	7	6.5888	-0.4112	6.5872	-0.4128	0.004	-0.8422	-0.8455
424	256061	Training	7.155	6.4882	-0.6668	6.4851	-0.6699	0.0047	-1.3662	-1.3726
425	256062	Training	6.638	6.6523	0.0143	6.6525	0.0145	0.0124	0.0295	0.0299
426	256063	Prediction	6.678	6.2164	-0.4616	-	-	0.006	-0.9463	-0.9463
427	256064	Prediction	7	6.3336	-0.6664	-	-	0.0059	-1.3662	-1.3662
428	256065	Training	5.971	6.4177	0.4467	6.4204	0.4494	0.006	0.9158	0.9213
429	256067	Training	6.495	6.312	-0.183	6.311	-0.184	0.0052	-0.3751	-0.3771
430	256068	Prediction	6.432	6.3552	-0.0768	-	-	0.0044	-0.1573	-0.1573
431	256069	Training	6.377	6.395	0.018	6.3951	0.0181	0.005	0.0368	0.037
432	256070	Training	6.569	6.3864	-0.1826	6.3855	-0.1835	0.0049	-0.3741	-0.376
433	256071	Training	6.276	6.5608	0.2848	6.5622	0.2862	0.0047	0.5836	0.5863
434	256072	Prediction	6.42	6.7621	0.3421	-	-	0.0035	0.7005	0.7005
435	256073	Training	6.721	6.5522	-0.1688	6.5514	-0.1696	0.0046	-0.3458	-0.3475
436	256074	Training	6.854	6.8185	-0.0355	6.8182	-0.0358	0.0086	-0.073	-0.0736
437	256075	Training	6.699	7.1203	0.4213	7.1233	0.4243	0.007	0.8643	0.8704
438	256076	Training	6.481	7.221	0.74	7.2263	0.7453	0.0072	1.518	1.529
439	256077	Training	6.638	6.2218	-0.4162	6.2192	-0.4188	0.0061	-0.8534	-0.8587
440	256078	Training	6.721	6.5888	-0.1322	6.5883	-0.1327	0.004	-0.2707	-0.2718
441	256079	Training	6.097	6.2218	0.1248	6.2225	0.1255	0.0061	0.2558	0.2574
442	256080	Training	6.208	6.4882	0.2802	6.4895	0.2815	0.0047	0.5741	0.5767
443	264098	Training	7	6.6573	-0.3427	6.6525	-0.3475	0.014	-0.7054	-0.7154
444	275577	Training	6.721	6.6874	-0.0336	6.6873	-0.0337	0.0046	-0.0687	-0.0691
445	275578	Training	7.222	6.9788	-0.2432	6.9766	-0.2454	0.009	-0.4994	-0.504
446	275579	Training	6.721	6.483	-0.238	6.4822	-0.2388	0.0036	-0.4873	-0.4891
447	275580	Prediction	6.469	6.3467	-0.1223	-	-	0.0044	-0.2505	-0.2505
448	275581	Training	5.842	6.2842	0.4422	6.2874	0.4454	0.0072	0.9072	0.9137
449	275582	Training	6.77	6.9799	0.2099	6.9823	0.2123	0.0113	0.4315	0.4365
450	275583	Training	6.824	6.8816	0.0576	6.8822	0.0582	0.01	0.1183	0.1195
451	275584	Training	7	6.8181	-0.1819	6.8167	-0.1833	0.0081	-0.3733	-0.3763
452	275585	Prediction	6.569	6.856	0.287	-	-	0.009	0.5894	0.5894
453	275586	Training	6.319	6.5898	0.2708	6.5919	0.2729	0.008	0.5557	0.5602
454	275587	Training	7.155	6.8461	-0.3089	6.8441	-0.3109	0.0063	-0.6334	-0.6374
455	275588	Training	6.347	6.8119	0.4649	6.8146	0.4676	0.0057	0.9531	0.9585
456	275589	Training	5.824	6.7738	0.9498	6.7793	0.9553	0.0058	1.947	1.9584
457	275590	Prediction	6.854	6.7321	-0.1219	-	-	0.0062	-0.25	-0.25
458	275591	Prediction	7	6.8647	-0.1353	-	-	0.0074	-0.2777	-0.2777
459	275593	Prediction	6.187	6.5914	0.4044	-	-	0.0042	0.8284	0.8284
460	275594	Training	6.886	6.6678	-0.2182	6.6667	-0.2193	0.0052	-0.4471	-0.4494
461	275595	Training	6.824	6.6417	-0.1823	6.6411	-0.1829	0.0037	-0.3732	-0.3746
462	275596	Training	6.638	7.3323	0.6943	7.3382	0.7002	0.0085	1.4252	1.4374
463	275598	Prediction	7.097	6.8521	-0.2449	-	-	0.0062	-0.5022	-0.5022
464	275599	Training	6.347	6.678	0.331	6.6809	0.3339	0.0086	0.6796	0.6855
465	275600	Training	6.854	6.5764	-0.2776	6.5753	-0.2787	0.0042	-0.5686	-0.571
466	275601	Training	5.827	6.7421	0.9151	6.7454	0.9184	0.0036	1.8738	1.8806
467	275604	Prediction	6.886	6.7963	-0.0897	-	-	0.0057	-0.1839	-0.1839
468	275605	Training	6.824	6.7455	-0.0785	6.745	-0.079	0.0052	-0.161	-0.1618
469	275606	Training	6.409	6.6448	0.2358	6.6459	0.2369	0.0046	0.4832	0.4854
470	275607	Prediction	6.161	6.7353	0.5743	-	-	0.0056	1.1772	1.1772
471	275608	Training	6.658	6.7356	0.0776	6.7362	0.0782	0.0071	0.1593	0.1604
472	275609	Training	7.155	6.6874	-0.4676	6.6853	-0.4697	0.0046	-0.9579	-0.9624
473	275611	Prediction	6.553	6.5868	0.0338	-	-	0.0043	0.0693	0.0693
474	275612	Training	6.921	6.6874	-0.2336	6.6864	-0.2346	0.0046	-0.4785	-0.4807
475	275613	Prediction	6.328	6.3917	0.0637	-	-	0.0032	0.1303	0.1303
476	275614	Training	6.432	6.9735	0.5415	6.9778	0.5458	0.0078	1.1113	1.12
477	275615	Training	6.602	6.6874	0.0854	6.6878	0.0858	0.0046	0.1751	0.1759
478	275616	Training	7	6.6874	-0.3126	6.686	-0.314	0.0046	-0.6404	-0.6433
479	275617	Training	6.77	6.8104	0.0404	6.8107	0.0407	0.0073	0.0828	0.0834
480	275618	Training	6.721	6.5868	-0.1342	6.5862	-0.1348	0.0043	-0.2749	-0.276
481	275619	Training	6.678	6.6874	0.0094	6.6875	0.0095	0.0046	0.0194	0.0194
482	275620	Prediction	6.569	6.7881	0.2191	-	-	0.0053	0.449	0.449
483	275621	Training	6.77	6.483	-0.287	6.482	-0.288	0.0036	-0.5877	-0.5898
484	275622	Training	6.658	6.483	-0.175	6.4824	-0.1756	0.0036	-0.3583	-0.3596
485	275623	Training	6.824	6.6896	-0.1344	6.689	-0.135	0.0047	-0.2754	-0.2767
486	275624	Prediction	6.678	6.589	-0.089	-	-	0.0043	-0.1824	-0.1824
487	275625	Training	6.721	6.6896	-0.0314	6.6894	-0.0316	0.0047	-0.0644	-0.0647
488	275626	Training	6.824	6.3822	-0.4418	6.3808	-0.4432	0.0032	-0.9044	-0.9073
489	275627	Training	6.678	6.3942	-0.2838	6.3932	-0.2848	0.0032	-0.5811	-0.583
490	275628	Training	6.77	6.5888	-0.1812	6.588	-0.182	0.0043	-0.3711	-0.3727
491	275629	Prediction	6.131	6.615	0.484	-	-	0.0052	0.9919	0.9919
492	275630	Training	6.721	6.3975	-0.3235	6.3965	-0.3245	0.0032	-0.6623	-0.6644
493	275631	Prediction	6.357	6.6914	0.3344	-	-	0.0047	0.6851	0.6851
494	275632	Prediction	6.678	6.3486	-0.3294	-	-	0.0044	-0.6747	-0.6747
495	275633	Training	6.699	6.547	-0.152	6.5464	-0.1526	0.0044	-0.3113	-0.3127
496	275634	Training	6.77	6.547	-0.223	6.546	-0.224	0.0044	-0.4568	-0.4588
497	275635	Training	6.745	6.4463	-0.2987	6.445	-0.3	0.004	-0.6119	-0.6144
498	275636	Prediction	6.495	6.4475	-0.0475	-	-	0.004	-0.0973	-0.0973
499	275637	Training	6.854	6.4475	-0.4065	6.4458	-0.4082	0.004	-0.8326	-0.836
500	275638	Training	6.06	6.38	0.32	6.381	0.321	0.0032	0.6552	0.6573
501	275639	Training	6.678	6.6621	-0.0159	6.6621	-0.0159	0.0046	-0.0325	-0.0326
502	275640	Training	6.658	6.4431	-0.2149	6.4423	-0.2157	0.0036	-0.44	-0.4416
503	275641	Training	6.509	6.3059	-0.2031	6.305	-0.204	0.0041	-0.416	-0.4178
504	275642	Training	7	6.483	-0.517	6.4812	-0.5188	0.0036	-1.0586	-1.0624
505	275643	Prediction	6.553	6.5988	0.0458	-	-	0.0044	0.0939	0.0939
506	275644	Prediction	6.456	6.6255	0.1695	-	-	0.0047	0.3474	0.3474
507	275645	Training	6.658	6.3824	-0.2756	6.3815	-0.2765	0.0032	-0.5643	-0.5661
508	275646	Training	6.237	6.3824	0.1454	6.3828	0.1458	0.0032	0.2976	0.2986
509	275647	Training	6.638	6.483	-0.155	6.4825	-0.1555	0.0036	-0.3174	-0.3185
510	275648	Training	6.102	6.483	0.381	6.4844	0.3824	0.0036	0.7802	0.783
511	275649	Training	7	6.6896	-0.3104	6.6881	-0.3119	0.0047	-0.636	-0.639
512	275650	Prediction	6.301	6.1412	-0.1598	-	-	0.0036	-0.3271	-0.3271
513	275651	Training	6.398	6.6486	0.2506	6.6498	0.2518	0.0045	0.5134	0.5158
514	275652	Training	6.854	6.6874	-0.1666	6.6867	-0.1673	0.0046	-0.3412	-0.3428
515	275653	Training	6.796	6.4764	-0.3196	6.4752	-0.3208	0.0036	-0.6545	-0.6568
516	275654	Training	7.097	6.589	-0.508	6.5868	-0.5102	0.0043	-1.0407	-1.0452
517	275655	Training	6.569	6.5493	-0.0197	6.5492	-0.0198	0.0044	-0.0403	-0.0405
518	275656	Prediction	6.469	6.5094	0.0404	-	-	0.0049	0.0828	0.0828
519	275657	Training	6.921	6.4762	-0.4448	6.4746	-0.4464	0.0036	-0.9108	-0.914
520	275658	Training	6.602	6.537	-0.065	6.5367	-0.0653	0.0044	-0.1331	-0.1337
521	275659	Training	6.921	6.4765	-0.4445	6.4749	-0.4461	0.0036	-0.9102	-0.9134
522	275660	Training	7.222	6.3757	-0.8463	6.3731	-0.8489	0.0032	-1.7325	-1.738
523	275661	Training	6.398	6.4767	0.0787	6.477	0.079	0.0036	0.1612	0.1618
524	275662	Training	7	6.4766	-0.5234	6.4747	-0.5253	0.0036	-1.0718	-1.0756
525	275666	Prediction	6.42	6.5859	0.1659	-	-	0.008	0.3405	0.3405
526	275667	Training	6.076	6.3848	0.3088	6.387	0.311	0.0071	0.6335	0.6381
527	275668	Training	6.301	6.4767	0.1757	6.4774	0.1764	0.0036	0.3598	0.3611
528	275669	Training	7.097	6.4766	-0.6204	6.4744	-0.6226	0.0036	-1.2704	-1.275
529	275670	Prediction	7.155	6.45	-0.705	-	-	0.0069	-1.4461	-1.4461
530	275671	Prediction	6.854	6.6512	-0.2028	-	-	0.0071	-0.4159	-0.4159
531	275672	Prediction	6.538	6.5772	0.0392	-	-	0.0083	0.0804	0.0804
532	275673	Training	6.602	6.4485	-0.1535	6.4479	-0.1541	0.004	-0.3143	-0.3156
533	275674	Training	6.081	6.5097	0.4287	6.5114	0.4304	0.0038	0.878	0.8814
534	275675	Training	6.721	6.5795	-0.1415	6.5783	-0.1427	0.0082	-0.2904	-0.2928
535	275676	Prediction	6.745	6.5797	-0.1653	-	-	0.0082	-0.3392	-0.3392
536	275677	Training	7.046	6.4398	-0.6062	6.4373	-0.6087	0.0041	-1.2417	-1.2469
537	275678	Training	6.796	6.44	-0.356	6.4385	-0.3575	0.0041	-0.7292	-0.7322
538	275679	Training	6.886	6.5427	-0.3433	6.5411	-0.3449	0.0044	-0.7033	-0.7065
539	275680	Training	6.796	6.5429	-0.2531	6.5418	-0.2542	0.0044	-0.5185	-0.5208
540	275681	Training	5.815	6.678	0.863	6.6855	0.8705	0.0086	1.7717	1.7871
541	275682	Training	6.678	6.7515	0.0735	6.7519	0.0739	0.0055	0.1506	0.1514
542	275683	Training	6.509	6.6873	0.1783	6.6881	0.1791	0.0046	0.3653	0.367
543	275684	Training	7.046	6.5773	-0.4687	6.5753	-0.4707	0.0042	-0.9601	-0.9641
544	275685	Training	6.959	6.474	-0.485	6.4723	-0.4867	0.0036	-0.9931	-0.9966
545	275686	Training	6.585	6.538	-0.047	6.5378	-0.0472	0.0045	-0.0962	-0.0967
546	275687	Training	6.495	6.4739	-0.0211	6.4738	-0.0212	0.0036	-0.0433	-0.0434
547	275688	Training	6.076	6.5379	0.4619	6.54	0.464	0.0045	0.9462	0.9505
548	323502	Training	6.77	6.7475	-0.0225	6.7474	-0.0226	0.0038	-0.0461	-0.0463
549	323503	Training	6.131	6.3699	0.2389	6.371	0.24	0.0046	0.4895	0.4918
550	323504	Training	6.796	6.3406	-0.4554	6.3385	-0.4575	0.0046	-0.933	-0.9373
551	323505	Training	6.62	6.4066	-0.2134	6.4057	-0.2143	0.0039	-0.4371	-0.4389
552	323506	Training	7	6.3794	-0.6206	6.3771	-0.6229	0.0036	-1.2709	-1.2755
553	323507	Training	6.432	6.2759	-0.1561	6.2752	-0.1568	0.0044	-0.3199	-0.3213
554	323508	Training	6.959	6.2766	-0.6824	6.2739	-0.6851	0.0039	-1.3976	-1.4031
555	323509	Training	6.585	6.6835	0.0985	6.6838	0.0988	0.003	0.2016	0.2022
556	323510	Training	6.602	6.9046	0.3026	6.9073	0.3053	0.0088	0.6212	0.6267
557	323511	Prediction	6.523	7.1058	0.5828	-	-	0.008	1.1961	1.1961
558	323512	Prediction	6.921	6.8405	-0.0805	-	-	0.0074	-0.1651	-0.1651
559	323513	Prediction	6.699	7.0418	0.3428	-	-	0.0067	0.703	0.703
560	323514	Training	6.569	6.7842	0.2152	6.7848	0.2158	0.0029	0.4404	0.4417
561	323515	Training	6.638	6.5829	-0.0551	6.5827	-0.0553	0.0034	-0.1128	-0.1132
562	323516	Training	6.538	6.7475	0.2095	6.7483	0.2103	0.0038	0.4291	0.4307
563	323517	Training	6.31	6.4413	0.1313	6.4419	0.1319	0.0042	0.269	0.2701
564	323518	Training	7.046	6.3794	-0.6666	6.377	-0.669	0.0036	-1.365	-1.3699
565	323519	Training	6.77	6.4434	-0.3266	6.4421	-0.3279	0.0042	-0.6689	-0.6718
566	323520	Training	6.854	6.9412	0.0872	6.9418	0.0878	0.0068	0.1789	0.1802
567	323521	Training	6.824	6.8406	0.0166	6.8407	0.0167	0.0074	0.0341	0.0343
568	323522	Training	6.854	6.9046	0.0506	6.9051	0.0511	0.0088	0.1039	0.1049
569	323523	Training	6.553	7.2065	0.6535	7.2119	0.6589	0.0081	1.3412	1.3523
570	323524	Training	7.097	6.4086	-0.6884	6.4058	-0.6912	0.004	-1.41	-1.4156
571	323525	Training	7	6.4726	-0.5274	6.4703	-0.5297	0.0042	-1.0804	-1.085
572	323526	Training	6.721	6.8294	0.1084	6.8297	0.1087	0.0032	0.2219	0.2226
573	323527	Prediction	6.367	6.8934	0.5264	-	-	0.0042	1.0782	1.0782
574	323528	Training	6.585	6.7308	0.1458	6.7313	0.1463	0.0033	0.2985	0.2995
575	323529	Training	6.921	6.6931	-0.2279	6.6923	-0.2287	0.0033	-0.4667	-0.4682
576	323530	Training	6.602	7.0978	0.4958	7.1014	0.4994	0.0071	1.0171	1.0244
577	323531	Training	6.796	6.5293	-0.2667	6.5282	-0.2678	0.0039	-0.5463	-0.5484
578	323532	Training	6.377	6.8334	0.4564	6.8349	0.4579	0.0032	0.9345	0.9375
579	395365	Training	5.311	5.6623	0.3513	5.6641	0.3531	0.0053	0.7199	0.7237
580	395368	Prediction	6.668	5.8524	-0.8156	-	-	0.0064	-1.6726	-1.6726
581	395372	Training	5.27	5.8052	0.5352	5.8083	0.5383	0.0058	1.0971	1.1035
582	395375	Training	5.171	5.7392	0.5682	5.7418	0.5708	0.0045	1.1641	1.1693
583	395378	Training	6.785	6.1644	-0.6206	6.1599	-0.6251	0.0071	-1.2731	-1.2822
584	395379	Training	5.181	5.8278	0.6468	5.8323	0.6513	0.007	1.3266	1.3359
585	395380	Training	5.073	5.9489	0.8759	5.9538	0.8808	0.0055	1.7955	1.8055
586	395381	Training	6.714	6.0745	-0.6395	6.0702	-0.6438	0.0067	-1.3116	-1.3204
587	395382	Training	6.394	5.8	-0.594	5.797	-0.597	0.0051	-1.2173	-1.2235
588	395383	Training	5.511	6.4135	0.9025	6.4246	0.9136	0.0121	1.8561	1.8788
589	395390	Training	6.256	5.8479	-0.4081	5.8459	-0.4101	0.0048	-0.8362	-0.8403
590	395392	Training	6.237	5.7648	-0.4722	5.7623	-0.4747	0.0052	-0.9677	-0.9728
591	395393	Training	5.287	5.6525	0.3655	5.6546	0.3676	0.0056	0.7493	0.7536
592	395397	Training	5.212	5.9638	0.7518	5.9682	0.7562	0.0058	1.5412	1.5501
593	395400	Training	5.721	6.1317	0.4107	6.1365	0.4155	0.0116	0.8444	0.8543
594	395422	Training	5.429	5.602	0.173	5.6027	0.1737	0.0042	0.3543	0.3558
595	395437	Training	5.052	5.6571	0.6051	5.663	0.611	0.0098	1.2428	1.2551
596	395438	Training	6.742	5.757	-0.985	5.7537	-0.9883	0.0033	-2.0167	-2.0235
597	395448	Training	5.301	5.5813	0.2803	5.5826	0.2816	0.0045	0.5743	0.5769
598	395449	Training	5.173	5.5813	0.4083	5.5832	0.4102	0.0045	0.8366	0.8404
599	395450	Prediction	6.063	5.9153	-0.1477	-	-	0.0107	-0.3036	-0.3036
600	395454	Training	5.924	4.9999	-0.9241	4.9955	-0.9285	0.0047	-1.8934	-1.9023
601	395458	Training	5.308	5.2752	-0.0328	5.2751	-0.0329	0.0039	-0.0672	-0.0675
602	395459	Training	4.666	5.0739	0.4079	5.0762	0.4102	0.0054	0.8361	0.8406
603	395461	Prediction	5.338	5.6557	0.3177	-	-	0.0045	0.6509	0.6509
604	395465	Training	5.719	5.6188	-0.1002	5.6184	-0.1006	0.0045	-0.2052	-0.2061
605	395467	Prediction	4.936	5.5635	0.6275	-	-	0.0053	1.286	1.286
606	395468	Training	4.824	5.6589	0.8349	5.6627	0.8387	0.0045	1.7105	1.7182
607	395469	Prediction	5.233	5.9795	0.7465	-	-	0.0063	1.5308	1.5308
608	395472	Training	5.264	5.6827	0.4187	5.6846	0.4206	0.0046	0.8578	0.8617
609	395476	Training	6.842	5.8092	-1.0328	5.8047	-1.0373	0.0043	-2.1157	-2.125
610	395477	Prediction	4.357	4.9513	0.5943	-	-	0.0066	1.2188	1.2188
611	395478	Training	7.115	5.8092	-1.3058	5.8035	-1.3115	0.0043	-2.675	-2.6867
612	395480	Training	6.413	5.9109	-0.5021	5.9093	-0.5037	0.0033	-1.0279	-1.0313
613	395481	Training	5.328	6.0157	0.6877	6.0182	0.6902	0.0036	1.4083	1.4134
614	395486	Training	5.533	5.465	-0.068	5.4648	-0.0682	0.0034	-0.1392	-0.1397
615	395487	Training	5.32	5.4457	0.1257	5.4464	0.1264	0.0054	0.2576	0.259
616	395489	Training	4.67	4.4544	-0.2156	4.452	-0.218	0.011	-0.4431	-0.448
617	395492	Training	5.939	5.3758	-0.5632	5.3737	-0.5653	0.0037	-1.1533	-1.1576
618	395494	Training	7.565	5.8092	-1.7558	5.8016	-1.7634	0.0043	-3.5967	-3.6124
619	395505	Prediction	4.301	4.5297	0.2287	-	-	0.0173	0.4716	0.4716
620	395506	Training	4.301	5.0226	0.7216	5.0279	0.7269	0.0073	1.4803	1.4912
621	395508	Prediction	4.301	4.9622	0.6612	-	-	0.0069	1.3563	1.3563
622	395512	Training	4.301	4.8858	0.5848	4.8948	0.5938	0.0151	1.2045	1.2229
623	395514	Training	4.301	5.0872	0.7862	5.0962	0.7952	0.0112	1.6162	1.6345
624	395516	Training	5.078	4.7766	-0.3014	4.7752	-0.3028	0.0046	-0.6175	-0.6203
625	395517	Training	4.301	4.8797	0.5787	4.8858	0.5848	0.0104	1.1892	1.2017
626	395522	Training	4.301	4.541	0.24	4.5421	0.2411	0.0045	0.4917	0.4939
627	395529	Training	5.255	4.768	-0.487	4.7658	-0.4892	0.0045	-0.9977	-1.0022
628	395530	Prediction	4.785	4.7683	-0.0167	-	-	0.0045	-0.0342	-0.0342
629	395531	Training	5.9	5.1642	-0.7358	5.1622	-0.7378	0.0027	-1.5061	-1.5102
630	395533	Prediction	4.301	4.5952	0.2942	-	-	0.0045	0.6027	0.6027
631	395536	Training	4.569	4.758	0.189	4.7589	0.1899	0.0045	0.3873	0.389
632	395537	Training	4.728	4.8689	0.1409	4.8697	0.1417	0.0051	0.2888	0.2903
633	395538	Prediction	5.297	4.9126	-0.3844	-	-	0.0074	-0.7886	-0.7886
634	395540	Training	4.301	4.5758	0.2748	4.577	0.276	0.0045	0.5629	0.5654
635	395541	Training	4.578	4.7051	0.1271	4.7058	0.1278	0.0049	0.2605	0.2618
636	395543	Training	5.521	4.7958	-0.7252	4.7924	-0.7286	0.0046	-1.4858	-1.4927
637	395544	Training	4.947	4.5911	-0.3559	4.5882	-0.3588	0.008	-0.7305	-0.7363
638	395545	Training	4.642	4.736	0.094	4.7365	0.0945	0.0046	0.1927	0.1936
639	395546	Prediction	4.301	4.5625	0.2615	-	-	0.0054	0.5359	0.5359
640	395547	Training	4.301	5.1712	0.8702	5.179	0.878	0.0089	1.7866	1.8027
641	395550	Prediction	4.301	4.7432	0.4422	-	-	0.0046	0.9059	0.9059
642	395551	Training	4.301	4.7825	0.4815	4.7869	0.4859	0.009	0.9888	0.9977
643	395553	Prediction	5.367	5.0251	-0.3419	-	-	0.0064	-0.7012	-0.7012
644	395554	Prediction	4.51	4.8487	0.3387	-	-	0.0051	0.694	0.694
645	395556	Prediction	4.9	4.7744	-0.1256	-	-	0.0046	-0.2574	-0.2574
646	395558	Training	4.597	4.9673	0.3703	4.9696	0.3726	0.006	0.7593	0.7639
647	395560	Prediction	5.056	4.6872	-0.3688	-	-	0.0051	-0.7557	-0.7557
648	395561	Training	4.506	4.6603	0.1543	4.6612	0.1552	0.0056	0.3163	0.3181
649	395562	Training	5.558	4.7516	-0.8064	4.7479	-0.8101	0.0046	-1.6521	-1.6596
650	395567	Prediction	5.143	4.7943	-0.3487	-	-	0.0046	-0.7144	-0.7144
651	395568	Training	4.301	4.638	0.337	4.64	0.339	0.0061	0.6909	0.6951
652	395569	Training	5.201	4.7928	-0.4082	4.7909	-0.4101	0.0046	-0.8363	-0.8402
653	395570	Prediction	4.301	4.6408	0.3398	-	-	0.0044	0.6962	0.6962
654	395574	Training	4.738	4.4578	-0.2802	4.4546	-0.2834	0.0111	-0.576	-0.5825
655	395575	Training	5.255	4.9518	-0.3032	4.95	-0.305	0.006	-0.6215	-0.6253
656	395578	Training	5.061	4.8665	-0.1945	4.8655	-0.1955	0.0051	-0.3986	-0.4006
657	395581	Training	4.301	4.9698	0.6688	4.9739	0.6729	0.006	1.3713	1.3796
658	395584	Training	4.301	4.9549	0.6539	4.9588	0.6578	0.0059	1.3405	1.3485
659	395586	Training	5.12	5.0405	-0.0795	5.0402	-0.0798	0.0036	-0.1628	-0.1634
660	395589	Training	4.301	4.5771	0.2761	4.5793	0.2783	0.008	0.5666	0.5711
661	395590	Training	4.693	4.6802	-0.0128	4.6801	-0.0129	0.0052	-0.0263	-0.0265
662	395591	Training	4.301	4.5652	0.2642	4.5664	0.2654	0.0044	0.5413	0.5437
663	531759	Training	7.222	6.7995	-0.4225	6.7972	-0.4248	0.0053	-0.866	-0.8706
664	531760	Prediction	7.222	6.6993	-0.5227	-	-	0.0039	-1.0706	-1.0706
665	531761	Prediction	7.222	7.3031	0.0811	-	-	0.0088	0.1665	0.1665
666	531762	Training	7.222	7.3034	0.0814	7.3041	0.0821	0.0088	0.1671	0.1686
667	531763	Training	7.222	7.3035	0.0815	7.3042	0.0822	0.0088	0.1673	0.1688
668	531764	Training	7.222	7.3035	0.0815	7.3042	0.0822	0.0088	0.1673	0.1688
669	531765	Prediction	7.222	7.2028	-0.0192	-	-	0.0074	-0.0393	-0.0393
670	531766	Training	7.222	6.9444	-0.2776	6.9425	-0.2795	0.007	-0.5694	-0.5734
671	531767	Training	7.222	6.8278	-0.3942	6.8244	-0.3976	0.0085	-0.8093	-0.8162
672	531768	Training	7.222	7.1878	-0.0342	7.1875	-0.0345	0.0075	-0.0702	-0.0707
673	531772	Training	7.222	6.5166	-0.7054	6.513	-0.709	0.005	-1.4456	-1.4529
674	531773	Training	7.222	6.481	-0.741	6.478	-0.744	0.004	-1.5177	-1.5238
675	531774	Training	7.222	6.6822	-0.5398	6.6787	-0.5433	0.0066	-1.1069	-1.1143
676	531776	Training	7.222	7.3191	0.0971	7.3201	0.0981	0.0095	0.1995	0.2014
677	531781	Prediction	7.222	6.8278	-0.3942	-	-	0.0085	-0.8093	-0.8093
678	531787	Training	7.222	7.1961	-0.0259	7.1959	-0.0261	0.0073	-0.0531	-0.0534
679	531788	Training	7.222	7.0987	-0.1233	7.0979	-0.1241	0.0062	-0.2529	-0.2545
680	531790	Training	7.222	7.2856	0.0636	7.2861	0.0641	0.0087	0.1305	0.1316
681	531794	Training	7.222	7.0861	-0.1359	7.0853	-0.1367	0.0062	-0.2787	-0.2804
682	531795	Training	7.222	7.3524	0.1304	7.3533	0.1313	0.0073	0.2674	0.2694
683	531796	Training	7.222	6.8849	-0.3371	6.8832	-0.3388	0.005	-0.6909	-0.6944
684	531799	Training	7.222	7.0861	-0.1359	7.0853	-0.1367	0.0062	-0.2787	-0.2804
685	531800	Training	7.222	6.8849	-0.3371	6.8832	-0.3388	0.005	-0.6909	-0.6944
686	531803	Prediction	7.222	7.0861	-0.1359	-	-	0.0062	-0.2787	-0.2787
687	531804	Training	7.222	7.453	0.231	7.4549	0.2329	0.0083	0.4741	0.4781
688	531805	Training	7.222	7.3524	0.1304	7.3533	0.1313	0.0073	0.2674	0.2694
689	531807	Training	7.222	7.1867	-0.0353	7.1865	-0.0355	0.0073	-0.0724	-0.0729
690	531808	Training	7.222	7.0861	-0.1359	7.0853	-0.1367	0.0062	-0.2787	-0.2804
691	531809	Prediction	7.222	7.0861	-0.1359	-	-	0.0062	-0.2787	-0.2787
692	531810	Training	7.222	7.3524	0.1304	7.3533	0.1313	0.0073	0.2674	0.2694
693	531811	Prediction	7.222	7.1867	-0.0353	-	-	0.0073	-0.0724	-0.0724
694	531812	Training	7.222	7.1867	-0.0353	7.1865	-0.0355	0.0073	-0.0724	-0.0729
695	531813	Training	7.222	7.6186	0.3966	7.624	0.402	0.0133	0.8162	0.8271
696	531814	Training	7.222	7.6216	0.3996	7.6269	0.4049	0.0132	0.8222	0.8332
697	531815	Training	7.222	7.1896	-0.0324	7.1894	-0.0326	0.0073	-0.0664	-0.0669
698	531816	Training	7.222	7.1896	-0.0324	7.1894	-0.0326	0.0073	-0.0664	-0.0669
699	531817	Training	7.222	7.089	-0.133	7.0882	-0.1338	0.0062	-0.2727	-0.2744
700	531989	Training	5.26	5.2007	-0.0593	5.2003	-0.0597	0.007	-0.1216	-0.1224
701	532036	Training	6.26	5.7779	-0.4821	5.7749	-0.4851	0.0061	-0.9885	-0.9946
702	992762	Training	6.458	5.7141	-0.7439	5.703	-0.755	0.0147	-1.5318	-1.5548
703	992763	Prediction	6.267	5.8148	-0.4522	-	-	0.0143	-0.9311	-0.9311
704	992764	Training	6.417	5.8148	-0.6022	5.806	-0.611	0.0143	-1.2399	-1.258
705	992765	Training	5.253	5.8148	0.5618	5.8229	0.5699	0.0143	1.1566	1.1734
706	992767	Training	5.493	5.9154	0.4224	5.9215	0.4285	0.0143	0.8696	0.8822
707	992768	Prediction	5.863	5.8148	-0.0482	-	-	0.0143	-0.0993	-0.0993
708	992769	Training	5.407	5.8148	0.4078	5.8207	0.4137	0.0143	0.8395	0.8517
709	992770	Training	6.174	5.8148	-0.3592	5.8095	-0.3645	0.0143	-0.7396	-0.7504
710	992772	Prediction	7.305	6.4411	-0.8639	-	-	0.0132	-1.7775	-1.7775
711	992773	Training	5.175	5.4792	0.3042	5.4827	0.3077	0.0114	0.6253	0.6325
712	992778	Training	5.835	5.6814	-0.1536	5.6793	-0.1557	0.0136	-0.316	-0.3204
713	50081481	Training	6.921	6.8721	-0.0489	6.8717	-0.0493	0.0092	-0.1004	-0.1013
714	50081482	Training	6.921	6.814	-0.107	6.8132	-0.1078	0.0075	-0.2195	-0.2211
715	50081483	Training	6.959	6.814	-0.145	6.8129	-0.1461	0.0075	-0.2974	-0.2997
716	50081484	Prediction	6.721	6.814	0.093	-	-	0.0075	0.1909	0.1909
717	50081485	Training	6.143	6.814	0.671	6.8191	0.6761	0.0075	1.3768	1.3871
718	50081486	Training	7.046	6.814	-0.232	6.8123	-0.2337	0.0075	-0.4759	-0.4795
719	50081487	Training	6.721	6.9147	0.1937	6.9162	0.1952	0.008	0.3974	0.4006
720	50081488	Prediction	6.377	6.814	0.437	-	-	0.0075	0.8967	0.8967
721	50081489	Training	6.658	6.814	0.156	6.8152	0.1572	0.0075	0.3201	0.3225
722	50081490	Training	6.347	6.814	0.467	6.8175	0.4705	0.0075	0.9582	0.9654
723	50081491	Training	6.854	6.814	-0.04	6.8137	-0.0403	0.0075	-0.082	-0.0826
724	50081492	Training	6.032	6.814	0.782	6.8199	0.7879	0.0075	1.6045	1.6166
725	50081493	Prediction	7.137	6.8276	-0.3094	-	-	0.0078	-0.6349	-0.6349
726	50081499	Prediction	6.276	6.379	0.103	-	-	0.003	0.2108	0.2108
727	50081500	Training	6.654	6.2502	-0.4038	6.2493	-0.4047	0.0022	-0.8263	-0.8281
728	50081502	Training	7.444	6.7199	-0.7241	6.7152	-0.7288	0.0064	-1.485	-1.4946
729	50081504	Prediction	6.71	6.6192	-0.0908	-	-	0.0058	-0.186	-0.186
730	50081505	Training	6	6.3507	0.3507	6.3516	0.3516	0.0026	0.7178	0.7196
731	50081506	Prediction	5.77	6.8874	1.1174	-	-	0.0138	2.2999	2.2999
732	50081507	Training	6.319	5.8063	-0.5127	5.8041	-0.5149	0.0043	-1.0502	-1.0548
733	50081508	Training	6.638	6.1839	-0.4541	6.182	-0.456	0.0043	-0.9302	-0.9342
734	50081511	Training	6.553	6.192	-0.361	6.1909	-0.3621	0.003	-0.739	-0.7413
735	50082995	Prediction	4.227	5.1673	0.9403	-	-	0.0091	1.9309	1.9309
736	50083008	Training	4.611	5.4133	0.8023	5.4172	0.8062	0.0048	1.6439	1.6518
737	50085646	Prediction	7.538	6.8628	-0.6752	-	-	0.0165	-1.3917	-1.3917
738	50085648	Training	7.481	7.0502	-0.4308	7.0315	-0.4495	0.0417	-0.8995	-0.9387
739	50085649	Training	7.469	6.8628	-0.6062	6.8526	-0.6164	0.0165	-1.2495	-1.2705
740	50085652	Training	7.167	7.129	-0.038	7.1282	-0.0388	0.0205	-0.0784	-0.08
741	50085653	Training	7	6.4294	-0.5706	6.4224	-0.5776	0.0121	-1.1734	-1.1877
742	50085654	Prediction	6.959	6.6089	-0.3501	-	-	0.0178	-0.722	-0.722
743	50085656	Training	6.796	6.2762	-0.5198	6.2709	-0.5251	0.01	-1.0679	-1.0787
744	50085657	Training	5.921	6.6827	0.7617	6.6951	0.7741	0.016	1.5696	1.5951
745	50085659	Training	5.854	6.4159	0.5619	6.4229	0.5689	0.0124	1.1557	1.1702
746	50085662	Training	5.409	6.1487	0.7397	6.1561	0.7471	0.0099	1.5195	1.5347
747	50086154	Training	7.824	8.0224	0.1984	8.0257	0.2017	0.0168	0.4089	0.4159
748	50086155	Prediction	7.824	7.8211	-0.0029	-	-	0.0174	-0.006	-0.006
749	50086156	Training	7.921	8.0224	0.1014	8.0241	0.1031	0.0168	0.2089	0.2125
750	50086157	Training	7.495	7.9868	0.4918	8.0003	0.5053	0.0268	1.0189	1.047
751	50086158	Training	7.77	7.7206	-0.0494	7.7197	-0.0503	0.0182	-0.1018	-0.1037
752	50086159	Training	7.481	7.8213	0.3403	7.8273	0.3463	0.0174	0.7016	0.714
753	50086160	Training	7.569	8.49	0.921	8.5143	0.9453	0.0257	1.9072	1.9575
754	50086162	Training	6.569	7.4544	0.8854	7.4673	0.8983	0.0144	1.8229	1.8496
755	50086164	Training	7.509	8.4112	0.9022	8.4287	0.9197	0.019	1.8619	1.8981
756	50086167	Training	6.495	6.632	0.137	6.6338	0.1388	0.0131	0.2818	0.2855
757	50086168	Training	6.53	7.0156	0.4856	7.0266	0.4966	0.0223	1.0038	1.0267
758	50086169	Training	7.444	6.8333	-0.6107	6.8265	-0.6175	0.011	-1.2553	-1.2693
759	50086170	Training	7.569	7.2169	-0.3521	7.2098	-0.3592	0.0196	-0.7269	-0.7415
760	50086171	Training	7.456	7.2222	-0.2338	7.2208	-0.2352	0.0061	-0.4793	-0.4822
761	50086172	Training	7.432	7.2222	-0.2098	7.221	-0.211	0.0061	-0.4301	-0.4327
762	50086174	Training	7.638	8.0225	0.3845	8.0291	0.3911	0.0168	0.7926	0.8062
763	50086175	Training	7.523	7.9219	0.3989	7.9287	0.4057	0.0169	0.8223	0.8365
764	50086176	Training	7.638	7.9219	0.2839	7.9268	0.2888	0.0169	0.5852	0.5953
765	50086177	Training	7.678	7.9219	0.2439	7.9261	0.2481	0.0169	0.5028	0.5114
766	50086179	Training	7.638	7.789	0.151	7.7909	0.1529	0.0121	0.3105	0.3143
767	50086180	Training	8	8.0225	0.0225	8.0229	0.0229	0.0168	0.0464	0.0472
768	50086181	Prediction	7.602	8.0225	0.4205	-	-	0.0168	0.8668	0.8668
769	50086186	Training	7.886	8.0225	0.1365	8.0248	0.1388	0.0168	0.2814	0.2862
770	50086187	Training	8.167	8.0224	-0.1446	8.0199	-0.1471	0.0168	-0.2982	-0.3033
771	50094903	Training	4.469	5.0937	0.6247	5.0986	0.6296	0.0077	1.282	1.292
772	50094905	Training	4.387	5.0966	0.7096	5.1019	0.7149	0.0074	1.4558	1.4667
773	50094906	Training	4.237	5.1425	0.9055	5.1497	0.9127	0.008	1.8583	1.8732
774	50094914	Training	4.187	4.9548	0.7678	4.9594	0.7724	0.0059	1.5741	1.5835
775	50094915	Training	4.161	5.0554	0.8944	5.0616	0.9006	0.0069	1.8346	1.8473
776	50094920	Training	4.201	4.6983	0.4973	4.7047	0.5037	0.0127	1.0231	1.0363
777	50094921	Training	4.456	4.6537	0.1977	4.6555	0.1995	0.0094	0.4059	0.4098
778	50094922	Prediction	3.921	4.3965	0.4755	-	-	0.0114	0.9774	0.9774
779	50095430	Training	6.201	6.5533	0.3523	6.5564	0.3554	0.0087	0.7232	0.7295
780	50095432	Training	6.886	6.2342	-0.6518	6.2269	-0.6591	0.0112	-1.3398	-1.3549
781	50095433	Training	6.481	6.383	-0.098	6.3821	-0.0989	0.0089	-0.2013	-0.2031
782	50095438	Prediction	6.886	6.1913	-0.6947	-	-	0.0099	-1.427	-1.427
783	50095439	Training	6.602	6.3205	-0.2815	6.318	-0.284	0.0088	-0.5779	-0.583
784	50095440	Prediction	5.824	6.8679	1.0439	-	-	0.0089	2.1434	2.1434
785	50095441	Prediction	7.155	6.3975	-0.7575	-	-	0.009	-1.5555	-1.5555
786	50095447	Training	6.886	6.5983	-0.2877	6.5958	-0.2902	0.0086	-0.5907	-0.5958
787	50095449	Prediction	6.208	7.1309	0.9229	-	-	0.013	1.8988	1.8988
788	50095450	Training	7.108	6.5133	-0.5947	6.5083	-0.5997	0.0084	-1.2206	-1.2309
789	50095453	Training	7.42	6.7277	-0.6923	6.7213	-0.6987	0.0091	-1.4216	-1.4347
790	50095459	Training	6.721	6.0419	-0.6791	6.0323	-0.6887	0.0138	-1.3979	-1.4175
791	50244250	Training	7.276	6.7512	-0.5248	6.745	-0.531	0.0117	-1.079	-1.0918
792	50244258	Training	7.056	6.55	-0.506	6.5444	-0.5116	0.0109	-1.04	-1.0515
793	50244261	Prediction	6.745	6.55	-0.195	-	-	0.0109	-0.4009	-0.4009
794	50244267	Prediction	7.357	6.7481	-0.6089	-	-	0.0117	-1.252	-1.252
795	50244271	Training	6.854	6.7242	-0.1298	6.7227	-0.1313	0.0114	-0.2668	-0.2699
796	50244272	Training	7.377	7.1033	-0.2737	7.0985	-0.2785	0.0173	-0.5643	-0.5742
797	50244274	Training	6.523	7.0069	0.4839	7.015	0.492	0.0165	0.9974	1.0141
798	50244276	Training	7.638	7.005	-0.633	6.9944	-0.6436	0.0165	-1.3047	-1.3266
799	50244281	Training	7.569	7.2559	-0.3131	7.2529	-0.3161	0.0094	-0.6431	-0.6492
800	50244282	Training	7.77	7.2559	-0.5141	7.251	-0.519	0.0094	-1.0559	-1.0659
801	50244283	Training	7.678	7.3565	-0.3215	7.3534	-0.3246	0.0095	-0.6604	-0.6667
802	50244285	Training	7.569	7.2559	-0.3131	7.2529	-0.3161	0.0094	-0.6431	-0.6492
803	50244290	Training	7.444	6.9339	-0.5101	6.9253	-0.5187	0.0165	-1.0514	-1.0691
804	50244291	Training	7.538	7.2559	-0.2821	7.2532	-0.2848	0.0094	-0.5794	-0.5849
805	50244294	Training	7.337	7.2559	-0.0811	7.2551	-0.0819	0.0094	-0.1666	-0.1682
806	50244300	Training	7.456	7.2559	-0.2001	7.254	-0.202	0.0094	-0.411	-0.4149
807	50244303	Training	7.155	7.7884	0.6334	7.8082	0.6532	0.0303	1.3148	1.3558
808	50244305	Training	7.26	7.3565	0.0965	7.3574	0.0974	0.0095	0.1982	0.2001
809	50244307	Prediction	7.237	7.2559	0.0189	-	-	0.0094	0.0387	0.0387
810	50244311	Prediction	7.357	7.4571	0.1001	-	-	0.01	0.2056	0.2056
811	50244313	Training	7.523	7.5577	0.0347	7.5581	0.0351	0.0108	0.0714	0.0721
812	50244317	Training	7.222	6.6506	-0.5714	6.6442	-0.5778	0.0111	-1.1745	-1.1878
813	50244321	Training	7.432	6.8518	-0.5802	6.8444	-0.5876	0.0126	-1.1934	-1.2087
814	50244324	Training	7.155	6.6506	-0.5044	6.6449	-0.5101	0.0111	-1.0368	-1.0485
815	50244329	Training	7.244	7.2559	0.0119	7.256	0.012	0.0094	0.0244	0.0246
816	50244330	Training	7.456	7.1552	-0.3008	7.1523	-0.3037	0.0096	-0.6178	-0.6237
817	50244331	Prediction	6.854	7.1082	0.2542	-	-	0.0177	0.5242	0.5242
818	50246360	Prediction	6.854	6.1398	-0.7142	-	-	0.0044	-1.463	-1.463
819	50334070	Training	4.523	5.4383	0.9153	5.443	0.92	0.0052	1.8757	1.8855
820	50338023	Prediction	5.708	5.2763	-0.4317	-	-	0.0039	-0.8842	-0.8842
821	50338046	Training	4.604	5.113	0.509	5.1162	0.5122	0.0062	1.0436	1.0501
822	50542190	Training	6.187	5.7146	-0.4724	5.7122	-0.4748	0.005	-0.968	-0.9729
823	50542192	Training	6.125	5.5122	-0.6128	5.5093	-0.6157	0.0047	-1.2557	-1.2616
824	50542194	Training	7.319	5.7022	-1.6168	5.6923	-1.6267	0.0061	-3.3149	-3.3352
825	50542197	Prediction	7.027	5.9399	-1.0871	-	-	0.0054	-2.2282	-2.2282
826	50553800	Training	6.318	5.5264	-0.7916	5.5175	-0.8005	0.0112	-1.6272	-1.6456
827	50589272	Training	5.854	5.4576	-0.3964	5.4553	-0.3987	0.0058	-0.8126	-0.8173
828	50589279	Training	6.31	6.0211	-0.2889	6.019	-0.291	0.0071	-0.5927	-0.5969
829	50589280	Training	6.292	6.0211	-0.2709	6.0191	-0.2729	0.0071	-0.5558	-0.5598
830	50630603	Training	5.907	6.5424	0.6354	6.546	0.639	0.0056	1.3024	1.3098
831	50630604	Training	7.046	6.5424	-0.5036	6.5396	-0.5064	0.0056	-1.0323	-1.0381
832	50630605	Training	6.367	6.5424	0.1754	6.5434	0.1764	0.0056	0.3595	0.3615
833	50630606	Prediction	6.824	6.3767	-0.4473	-	-	0.003	-0.9156	-0.9156
834	50630607	Training	6.959	6.643	-0.316	6.6411	-0.3179	0.0059	-0.6478	-0.6517
835	50630609	Training	6.398	6.5424	0.1444	6.5432	0.1452	0.0056	0.296	0.2976
836	50630611	Training	6.538	6.4774	-0.0606	6.4771	-0.0609	0.0038	-0.1242	-0.1246
837	50630612	Training	6.854	6.2761	-0.5779	6.2746	-0.5794	0.0026	-1.1827	-1.1858
838	50630613	Training	6.036	6.4774	0.4414	6.479	0.443	0.0038	0.9039	0.9073
839	50630616	Training	6.081	6.2761	0.1951	6.2766	0.1956	0.0026	0.3993	0.4004
840	50630617	Training	6.444	6.5424	0.0984	6.5429	0.0989	0.0056	0.2017	0.2028
841	50630618	Training	6.495	6.5424	0.0474	6.5427	0.0477	0.0056	0.0971	0.0977
842	50630619	Prediction	6.244	6.5424	0.2984	-	-	0.0056	0.6116	0.6116
843	50642660	Training	6.9	6.2111	-0.6889	6.207	-0.693	0.0058	-1.4123	-1.4206
844	50642662	Training	5.478	6.208	0.73	6.2122	0.7342	0.0058	1.4964	1.505
845	50642664	Training	6.697	6.0099	-0.6871	6.0068	-0.6902	0.0044	-1.4077	-1.4139
846	50642666	Prediction	6.815	6.2111	-0.6039	-	-	0.0058	-1.238	-1.238
847	50642668	Training	6.198	6.1755	-0.0225	6.1754	-0.0226	0.0025	-0.0461	-0.0462
848	50642669	Training	6.305	5.9092	-0.3958	5.9076	-0.3974	0.0042	-0.8107	-0.8141
849	50642670	Prediction	6.054	6.4123	0.3583	-	-	0.0087	0.7357	0.7357
850	50642671	Training	6.521	6.1105	-0.4105	6.1084	-0.4126	0.0049	-0.8412	-0.8454
851	50642672	Training	6.726	6.3117	-0.4143	6.3088	-0.4172	0.0071	-0.8498	-0.8559
852	50642674	Training	6.008	6.4123	0.4043	6.4159	0.4079	0.0087	0.8301	0.8374
853	50651086	Training	7.194	6.643	-0.551	6.6397	-0.5543	0.0059	-1.1296	-1.1363
854	50651087	Training	6.936	6.2761	-0.6599	6.2744	-0.6616	0.0026	-1.3506	-1.354
855	50651088	Training	7.056	6.708	-0.348	6.7032	-0.3528	0.0137	-0.7162	-0.7261
856	50651089	Training	6.848	6.2761	-0.5719	6.2747	-0.5733	0.0026	-1.1704	-1.1734
857	50651090	Training	7.076	6.6074	-0.4686	6.6007	-0.4753	0.0142	-0.9647	-0.9786
858	50651091	Prediction	7.071	6.2761	-0.7949	-	-	0.0026	-1.6269	-1.6269
859	50651092	Training	7.237	6.5424	-0.6946	6.5385	-0.6985	0.0056	-1.4238	-1.4318
860	50651094	Prediction	7.131	6.5424	-0.5886	-	-	0.0056	-1.2065	-1.2065
861	50651095	Training	7.114	6.8661	-0.2479	6.8642	-0.2498	0.0073	-0.5087	-0.5124
862	50651096	Training	7.18	7.233	0.053	7.2335	0.0535	0.0095	0.1088	0.1098
863	50651097	Training	6.883	6.1755	-0.7075	6.1737	-0.7093	0.0025	-1.448	-1.4515
864	50651098	Training	7.081	6.3411	-0.7399	6.3367	-0.7443	0.006	-1.5169	-1.526
865	50651103	Training	7.081	6.5424	-0.5386	6.5394	-0.5416	0.0056	-1.104	-1.1103
866	50651104	Training	7.187	6.5424	-0.6446	6.5388	-0.6482	0.0056	-1.3213	-1.3288
867	50651105	Training	7.155	6.5424	-0.6126	6.5389	-0.6161	0.0056	-1.2557	-1.2628
868	50651106	Training	7.222	6.5424	-0.6796	6.5386	-0.6834	0.0056	-1.3931	-1.4009
869	50651107	Training	6.936	6.7436	-0.1924	6.7424	-0.1936	0.0066	-0.3945	-0.3971
870	50651108	Training	7.081	6.8443	-0.2367	6.8424	-0.2386	0.0076	-0.4858	-0.4895
871	50651109	Prediction	7.167	6.9449	-0.2221	-	-	0.009	-0.4561	-0.4561
872	50651110	Training	6.642	6.643	0.001	6.643	0.001	0.0059	0.0021	0.0021
873	50651111	Training	7.097	6.7436	-0.3534	6.7413	-0.3557	0.0066	-0.7247	-0.7295
874	50651112	Training	6.738	7.1323	0.3943	7.136	0.398	0.0093	0.8098	0.8174
875	50651113	Training	7.041	6.8305	-0.2105	6.8282	-0.2128	0.0106	-0.4327	-0.4373
876	50651114	Training	6.839	6.5424	-0.2966	6.5407	-0.2983	0.0056	-0.608	-0.6114
877	50662566	Prediction	4.839	4.6401	-0.1989	-	-	0.0049	-0.4076	-0.4076
878	50662567	Training	4.656	4.439	-0.217	4.4376	-0.2184	0.0062	-0.445	-0.4477
879	50664315	Training	5.523	5.6161	0.0931	5.6164	0.0934	0.0037	0.1906	0.1913
880	50664331	Training	4.62	4.93	0.31	4.9309	0.3109	0.003	0.6346	0.6365
881	50664333	Training	5.018	5.024	0.006	5.024	0.006	0.0036	0.0123	0.0124
882	50664335	Training	4.481	4.6014	0.1204	4.6024	0.1214	0.0081	0.2471	0.2491
883	50664336	Training	4.796	4.6564	-0.1396	4.6556	-0.1404	0.0052	-0.2862	-0.2877
884	50664338	Training	5.161	5.7182	0.5572	5.7209	0.5599	0.0048	1.1418	1.1473
885	50702028	Training	5.886	6.9405	1.0545	6.9485	1.0625	0.0075	2.1636	2.18
886	50702029	Training	5.886	7.0177	1.1317	7.0436	1.1576	0.0224	2.3396	2.3932
887	50702030	Training	6.046	6.7548	0.7088	6.7588	0.7128	0.0056	1.4528	1.4611
888	50702031	Training	7.523	7.0691	-0.4539	7.0653	-0.4577	0.0082	-0.9317	-0.9394
889	50711989	Training	6.815	7.0322	0.2172	7.034	0.219	0.0083	0.4458	0.4495
890	50711990	Training	6.735	6.9747	0.2397	6.9766	0.2416	0.0078	0.4919	0.4958
891	50711991	Prediction	6.788	7.2224	0.4344	-	-	0.0114	0.8931	0.8931
892	50711992	Training	6.886	7.1631	0.2771	7.1663	0.2803	0.0113	0.5697	0.5762
893	50711993	Training	7.131	6.9927	-0.1383	6.9915	-0.1395	0.0082	-0.2839	-0.2862
894	50711994	Training	7.432	6.8668	-0.5652	6.8605	-0.5715	0.011	-1.1617	-1.1747
895	50711995	Training	7.071	6.8668	-0.2042	6.8645	-0.2065	0.011	-0.4197	-0.4244
896	50711996	Training	6.777	6.6005	-0.1765	6.5988	-0.1782	0.0094	-0.3624	-0.3659
897	50711998	Prediction	6.796	6.8741	0.0781	-	-	0.0071	0.1602	0.1602
898	50712000	Prediction	6.775	6.8018	0.0268	-	-	0.0092	0.055	0.055
899	50712001	Prediction	7.26	6.8543	-0.4057	-	-	0.0107	-0.8338	-0.8338
900	50712002	Training	7.387	6.8543	-0.5327	6.8485	-0.5385	0.0107	-1.0947	-1.1066
901	50712003	Training	6.721	7.2568	0.5358	7.2628	0.5418	0.0112	1.1014	1.1138
902	50712004	Training	6.585	7.2568	0.6718	7.2644	0.6794	0.0112	1.3809	1.3965
903	50712005	Training	6.62	7.458	0.838	7.4695	0.8495	0.0135	1.7247	1.7483
904	50712006	Training	7.62	7.3574	-0.2626	7.3542	-0.2658	0.0122	-0.5401	-0.5467
905	50712007	Training	7.523	7.3574	-0.1656	7.3554	-0.1676	0.0122	-0.3406	-0.3448
906	50712008	Training	7.553	7.2568	-0.2962	7.2534	-0.2996	0.0112	-0.6089	-0.6158
907	50712009	Prediction	7.398	7.2568	-0.1412	-	-	0.0112	-0.2903	-0.2903
908	50712010	Training	8.268	7.6085	-0.6595	7.601	-0.667	0.0112	-1.3557	-1.3711
909	50712013	Training	7.409	7.3574	-0.0516	7.3568	-0.0522	0.0122	-0.1061	-0.1074
910	50712014	Training	7.9	7.2568	-0.6432	7.2495	-0.6505	0.0112	-1.3222	-1.3372
911	50712015	Training	7.824	7.458	-0.366	7.453	-0.371	0.0135	-0.7532	-0.7635
912	50712018	Training	7.708	7.3574	-0.3506	7.3531	-0.3549	0.0122	-0.721	-0.7299
913	50712020	Training	6.67	6.8899	0.2199	6.8919	0.2219	0.0092	0.4516	0.4557
914	50712021	Prediction	6.921	6.8899	-0.0311	-	-	0.0092	-0.0639	-0.0639
915	50712022	Training	7.585	6.9622	-0.6228	6.9574	-0.6276	0.0076	-1.2779	-1.2877
916	50712023	Training	7.469	7.2046	-0.2644	7.2017	-0.2673	0.0109	-0.5433	-0.5494
917	50712024	Prediction	7.469	7.1313	-0.3377	-	-	0.0096	-0.6936	-0.6936
918	50712025	Training	7.149	7.6159	0.4669	7.6222	0.4732	0.0134	0.9607	0.9738
919	50712026	Training	7.62	7.1315	-0.4885	7.1267	-0.4933	0.0096	-1.0034	-1.0132
920	50712027	Training	7.495	7.0309	-0.4641	7.027	-0.468	0.0082	-0.9527	-0.9606
921	50712028	Training	7.495	7.5581	0.0631	7.5587	0.0637	0.0092	0.1296	0.1308
922	50712029	Training	7.658	7.1315	-0.5265	7.1264	-0.5316	0.0096	-1.0815	-1.092
923	50712030	Prediction	7.62	7.2816	-0.3384	-	-	0.0158	-0.6973	-0.6973
924	50712033	Training	7.076	6.9802	-0.0958	6.9794	-0.0966	0.0079	-0.1966	-0.1982
925	50712035	Training	6.602	7.3069	0.7049	7.3123	0.7103	0.0076	1.4463	1.4573
926	50712036	Training	7.569	7.4625	-0.1065	7.4615	-0.1075	0.0098	-0.2187	-0.2208
927	50712037	Training	7.398	7.2941	-0.1039	7.2933	-0.1047	0.0076	-0.2132	-0.2148
928	50712039	Prediction	7.444	7.495	0.051	-	-	0.0088	0.1046	0.1046
929	50712040	Training	6.585	7.1222	0.5372	7.1274	0.5424	0.0095	1.1033	1.114
930	50712041	Prediction	7.319	7.0266	-0.2924	-	-	0.009	-0.6004	-0.6004
931	50712042	Training	7.208	7.4438	0.2358	7.4459	0.2379	0.0086	0.4841	0.4883
932	50712043	Training	7.481	7.5955	0.1145	7.5967	0.1157	0.0105	0.2353	0.2377
933	50712044	Training	7.469	7.5959	0.1269	7.5973	0.1283	0.0105	0.2608	0.2636
934	50712045	Training	7.699	7.1011	-0.5979	7.0955	-0.6035	0.0094	-1.2278	-1.2395
935	50712046	Prediction	7.824	7.587	-0.237	-	-	0.0114	-0.4873	-0.4873
936	50712047	Training	7.398	7.4178	0.0198	7.4181	0.0201	0.0135	0.0407	0.0413
937	50712048	Training	6.638	6.0949	-0.5431	6.0936	-0.5444	0.0023	-1.1115	-1.1141
938	50712049	Prediction	6.367	6.0502	-0.3168	-	-	0.002	-0.6482	-0.6482
939	50712050	Training	6.208	6.9456	0.7376	6.9568	0.7488	0.015	1.5191	1.5422
940	50712051	Prediction	5.796	6.3124	0.5164	-	-	0.0047	1.0581	1.0581
941	50712052	Training	7.854	7.2568	-0.5972	7.25	-0.604	0.0112	-1.2276	-1.2415
942	50730037	Training	5.52	5.0748	-0.4452	5.0704	-0.4496	0.0099	-0.9145	-0.9237
943	50730050	Training	5.527	5.4618	-0.0652	5.461	-0.066	0.0122	-0.1342	-0.1358
944	50757266	Training	6.156	5.5097	-0.6463	5.506	-0.65	0.0056	-1.3249	-1.3323
945	50788579	Training	6.427	6.2123	-0.2147	6.2107	-0.2163	0.0076	-0.4405	-0.4439
946	50788580	Prediction	6.07	6.1557	0.0857	-	-	0.0072	0.1758	0.1758
947	50788581	Training	6.124	6.0625	-0.0615	6.0621	-0.0619	0.007	-0.1262	-0.127
948	50820653	Training	6.545	6.7682	0.2232	6.7693	0.2243	0.0049	0.4573	0.4596
949	50820655	Training	6.587	6.5669	-0.0201	6.5668	-0.0202	0.0059	-0.0412	-0.0414
950	50820659	Training	6.325	7.1599	0.8349	7.1742	0.8492	0.0168	1.7211	1.7505
951	50820661	Training	7.009	6.5669	-0.4421	6.5643	-0.4447	0.0059	-0.9063	-0.9116
952	50820667	Prediction	6.914	6.2188	-0.6952	-	-	0.0135	-1.4307	-1.4307
953	50820671	Training	7.102	6.6675	-0.4345	6.6653	-0.4367	0.0052	-0.8904	-0.8951
954	50820676	Prediction	6.289	6.55	0.261	-	-	0.0098	0.5362	0.5362
955	50820679	Prediction	7.143	7.4587	0.3157	-	-	0.0089	0.6483	0.6483
956	50820680	Prediction	6.434	7.1592	0.7252	-	-	0.0099	1.4898	1.4898
957	50820705	Training	6.724	6.8688	0.1448	6.8695	0.1455	0.005	0.2967	0.2982
958	50820709	Prediction	7.678	6.9694	-0.7086	-	-	0.0054	-1.4523	-1.4523
959	50820713	Prediction	7.553	6.9694	-0.5836	-	-	0.0054	-1.1961	-1.1961
960	50820715	Training	7.409	6.7031	-0.7059	6.6968	-0.7122	0.0089	-1.4493	-1.4624
961	50820718	Training	6.368	6.5019	0.1339	6.503	0.135	0.0083	0.2748	0.2771
962	50820755	Training	6.686	6.9694	0.2834	6.971	0.285	0.0054	0.5809	0.584
963	50820761	Training	6.686	6.8688	0.1828	6.8697	0.1837	0.005	0.3746	0.3765
964	50820775	Training	6.821	6.9694	0.1484	6.9702	0.1492	0.0054	0.3042	0.3058
965	50820779	Training	6.951	6.7682	-0.1828	6.7673	-0.1837	0.0049	-0.3746	-0.3765
966	50820782	Training	6.401	6.3194	-0.0816	6.3184	-0.0826	0.0124	-0.1678	-0.1699
967	50820789	Training	6.513	6.1182	-0.3948	6.1122	-0.4008	0.0149	-0.8132	-0.8255
968	50820790	Training	6.812	6.8688	0.0568	6.8691	0.0571	0.005	0.1164	0.117
969	50881499	Training	4.699	4.4507	-0.2483	4.4493	-0.2497	0.0058	-0.509	-0.5119
970	50881517	Training	6	5.3172	-0.6828	5.3139	-0.6861	0.0048	-1.399	-1.4057
971	50901686	Training	5.208	5.1531	-0.0549	5.1528	-0.0552	0.0044	-0.1125	-0.113
972	50926388	Training	6.152	5.8057	-0.3463	5.8038	-0.3482	0.0055	-0.7098	-0.7137
973	50926389	Training	6.246	5.8071	-0.4389	5.8046	-0.4414	0.0055	-0.8997	-0.9046
974	50926390	Training	6.136	5.8071	-0.3289	5.8053	-0.3307	0.0055	-0.6742	-0.6779
975	50926391	Training	5.722	5.8071	0.0851	5.8076	0.0856	0.0055	0.1745	0.1755
976	50926393	Training	6.177	5.8176	-0.3594	5.8156	-0.3614	0.0057	-0.7367	-0.7409
977	50926394	Training	5.133	6.0844	0.9514	6.0905	0.9575	0.0063	1.9509	1.9633
978	50926395	Training	5.111	6.0831	0.9721	6.0892	0.9782	0.0063	1.9932	2.0059
979	50926396	Training	6.397	6.0825	-0.3145	6.0805	-0.3165	0.0063	-0.6449	-0.649
980	50926397	Training	5.437	5.8162	0.3792	5.8184	0.3814	0.0057	0.7773	0.7818
981	50926399	Training	5.001	5.8012	0.8002	5.8055	0.8045	0.0054	1.64	1.6488
982	50926400	Training	5.236	5.6592	0.4232	5.6613	0.4253	0.0048	0.8672	0.8714
983	50926402	Prediction	6.303	5.8091	-0.4939	-	-	0.0055	-1.0123	-1.0123
984	50926403	Training	5.346	5.6592	0.3132	5.6608	0.3148	0.0048	0.6418	0.645
985	50926404	Training	4.771	5.6592	0.8882	5.6636	0.8926	0.0048	1.82	1.8289
986	50926405	Training	5.422	5.568	0.146	5.5687	0.1467	0.0046	0.2992	0.3006
987	50941472	Prediction	5.602	5.9219	0.3199	-	-	0.0154	0.659	0.659
988	50941473	Training	6.009	6.3413	0.3323	6.3444	0.3354	0.009	0.6824	0.6886
989	50941474	Training	6.108	6.3844	0.2764	6.3873	0.2793	0.0106	0.5679	0.574
990	50941476	Training	5.721	6.2425	0.5215	6.247	0.526	0.0087	1.0705	1.0799
991	50941478	Prediction	6.046	5.6502	-0.3958	-	-	0.0047	-0.811	-0.811
992	50941482	Prediction	5.745	6.2425	0.4975	-	-	0.0087	1.0213	1.0213
993	50941483	Training	5.398	6.1418	0.7438	6.1491	0.7511	0.0097	1.5279	1.5428
994	50941484	Training	6.18	6.712	0.532	6.7211	0.5411	0.0168	1.0966	1.1153
995	50941485	Training	6.215	5.6923	-0.5227	5.6866	-0.5284	0.0107	-1.0742	-1.0858
996	50941486	Training	6.638	6.2755	-0.3625	6.2702	-0.3678	0.0145	-0.7464	-0.7573
997	50941487	Prediction	6.046	6.1998	0.1538	-	-	0.0105	0.3161	0.3161
998	50941488	Training	5.959	6.1772	0.2182	6.1797	0.2207	0.0113	0.4485	0.4536
999	50941489	Training	6.215	6.573	0.358	6.5774	0.3624	0.0119	0.7363	0.7452
1000	50941490	Prediction	6.131	6.121	-0.01	-	-	0.0136	-0.0207	-0.0207
1001	50941491	Prediction	5.77	6.0043	0.2343	-	-	0.0122	0.4818	0.4818
1002	50941492	Prediction	6.244	6.8103	0.5663	-	-	0.0132	1.1653	1.1653
1003	50941493	Training	5.824	6.1804	0.3564	6.1844	0.3604	0.0111	0.7326	0.7409
1004	50941494	Training	5.886	6.3749	0.4889	6.3803	0.4943	0.0109	1.0049	1.016
1005	50941496	Prediction	6.009	6.0157	0.0067	-	-	0.0118	0.0138	0.0138
1006	50941498	Training	5.959	6.3074	0.3484	6.3109	0.3519	0.0099	0.7158	0.7229
1007	50941499	Training	6.481	6.7844	0.3034	6.7886	0.3076	0.0139	0.6244	0.6333
1008	50941500	Training	5.959	6.5764	0.6174	6.5838	0.6248	0.0118	1.2695	1.2847
1009	50941501	Training	6.201	6.6241	0.4231	6.6305	0.4295	0.0149	0.8714	0.8846
1010	50941502	Training	6.409	5.8214	-0.5876	5.8114	-0.5976	0.0169	-1.2112	-1.232
1011	50941503	Training	6.119	6.1166	-0.0024	6.1166	-0.0024	0.0107	-0.0049	-0.0049
1012	50941504	Training	6.328	6.2521	-0.0759	6.2514	-0.0766	0.0091	-0.1559	-0.1573
1013	50941505	Training	5.638	6.0452	0.4072	6.0497	0.4117	0.011	0.8369	0.8463
1014	50941507	Training	5.585	6.2786	0.6936	6.2862	0.7012	0.0108	1.4255	1.4411
1015	50941508	Training	5.62	6.1858	0.5658	6.1953	0.5753	0.0166	1.1661	1.1858
1016	50941509	Prediction	5.886	6.1059	0.2199	-	-	0.011	0.452	0.452
1017	50941510	Training	6.398	6.7841	0.3861	6.7896	0.3916	0.0139	0.7949	0.8061
1018	50941511	Training	5.824	5.9194	0.0954	5.9209	0.0969	0.0155	0.1966	0.1997
1019	50941512	Training	6.602	6.4227	-0.1793	6.4203	-0.1817	0.0133	-0.369	-0.374
1020	50941514	Training	5.854	6.1163	0.2623	6.1191	0.2651	0.0107	0.539	0.5448
1021	50941515	Training	5.886	5.9221	0.0361	5.9226	0.0366	0.0154	0.0743	0.0755
1022	50941517	Training	5.886	6.0201	0.1341	6.0221	0.1361	0.0144	0.2761	0.2802
1023	50941518	Training	6.229	6.6452	0.4162	6.6494	0.4204	0.0099	0.855	0.8636
1024	50941519	Training	6.149	6.1781	0.0291	6.1784	0.0294	0.0093	0.0599	0.0604
1025	50941520	Training	6.097	6.3796	0.2826	6.382	0.285	0.0083	0.5801	0.5849
1026	50941521	Prediction	6.097	6.0882	-0.0088	-	-	0.0102	-0.0182	-0.0182
1027	50941522	Prediction	6.137	6.1373	0.0003	-	-	0.0097	0.0007	0.0007
1028	50941523	Training	6.387	6.8627	0.4757	6.8684	0.4814	0.012	0.9781	0.99
1029	50941525	Prediction	6.432	6.4204	-0.0116	-	-	0.0095	-0.0238	-0.0238
1030	50941526	Training	6.237	6.9237	0.6867	6.9339	0.6969	0.0145	1.414	1.4349
1031	50941527	Training	6.337	6.0286	-0.3084	6.025	-0.312	0.0115	-0.6341	-0.6415
1032	50941528	Training	6.77	6.4545	-0.3155	6.4518	-0.3182	0.0087	-0.6477	-0.6533
1033	50941529	Training	6.167	5.9571	-0.2099	5.9545	-0.2125	0.0122	-0.4316	-0.4369
1034	50941530	Training	6.237	6.0777	-0.1593	6.0761	-0.1609	0.0104	-0.3272	-0.3307
1035	50941531	Training	6.301	6.8711	0.5701	6.878	0.577	0.0119	1.1724	1.1865
1036	50941532	Training	6.699	6.9037	0.2047	6.9068	0.2078	0.015	0.4216	0.428
1037	50941533	Training	6.456	6.7027	0.2467	6.7057	0.2497	0.012	0.5074	0.5135
1038	50953206	Training	7.678	7.4519	-0.2261	7.4494	-0.2286	0.0113	-0.4647	-0.47
1039	51100789	Training	7.328	7.5507	0.2227	7.5533	0.2253	0.0114	0.4579	0.4632
1040	51100796	Training	7.398	6.5445	-0.8535	6.526	-0.872	0.0212	-1.7634	-1.8017
1041	51100803	Training	6.91	7.1614	0.2514	7.1647	0.2547	0.0128	0.5172	0.5239
1042	51100805	Training	6.432	7.0253	0.5933	7.0349	0.6029	0.0158	1.2225	1.2421
1043	51100807	Training	6.585	6.8879	0.3029	6.8933	0.3083	0.0177	0.6247	0.6359
1044	51100809	Training	7	6.888	-0.112	6.886	-0.114	0.0177	-0.2309	-0.2351
1045	51105261	Training	4.407	4.5262	0.1192	4.5274	0.1204	0.0101	0.2449	0.2474
1046	51127274	Training	7.31	6.9199	-0.3901	6.8947	-0.4153	0.0607	-0.8227	-0.8758
1047	51127275	Training	7.066	6.1876	-0.8784	6.1612	-0.9048	0.0292	-1.8222	-1.877
1048	51182741	Training	4.903	4.8616	-0.0414	4.8613	-0.0417	0.0081	-0.085	-0.0856
1049	51197212	Training	5.155	5.6435	0.4885	5.6567	0.5017	0.0264	1.0119	1.0393
1050	51208102	Training	4.87	4.7002	-0.1698	4.6992	-0.1708	0.0061	-0.348	-0.3502
1051	51208234	Training	5.01	4.8599	-0.1501	4.8589	-0.1511	0.0071	-0.3078	-0.31
1052	51208235	Prediction	5.36	5.1457	-0.2143	-	-	0.0087	-0.4399	-0.4399
1053	51208236	Training	6.194	5.3603	-0.8337	5.3511	-0.8429	0.0109	-1.7135	-1.7324
1054	51208237	Training	5.845	4.6164	-1.2286	4.605	-1.24	0.0091	-2.5229	-2.5462
1055	51208238	Training	5.199	4.8438	-0.3552	4.8411	-0.3579	0.0074	-0.7288	-0.7342
1056	51208240	Training	5.275	4.5593	-0.7157	4.5529	-0.7221	0.0089	-1.4695	-1.4827
1057	51208242	Prediction	5.917	5.2006	-0.7164	-	-	0.0111	-1.4725	-1.4725
1058	51208243	Training	4.673	4.6765	0.0035	4.6766	0.0036	0.0076	0.0073	0.0073
1059	51208244	Training	4.928	4.954	0.026	4.9542	0.0262	0.0073	0.0533	0.0537
1060	51208245	Training	5.192	4.6457	-0.5463	4.6411	-0.5509	0.0083	-1.1213	-1.1307
1061	51208246	Training	5.614	4.6085	-1.0055	4.599	-1.015	0.0094	-2.065	-2.0846
1062	51208249	Training	5.648	4.5734	-1.0746	4.5618	-1.0862	0.0107	-2.2084	-2.2322
1063	51208251	Training	4.816	4.9091	0.0931	4.9106	0.0946	0.0158	0.1919	0.195
1064	51208252	Training	4.646	4.7429	0.0969	4.7437	0.0977	0.0077	0.1988	0.2004
1065	51208253	Prediction	5.435	4.643	-0.792	-	-	0.0166	-1.6326	-1.6326
1066	51208254	Training	4.941	4.8084	-0.1326	4.8061	-0.1349	0.0169	-0.2735	-0.2782
1067	51208255	Training	5.265	4.8439	-0.4211	4.8407	-0.4243	0.0074	-0.864	-0.8705
1068	51208256	Prediction	5.291	4.5057	-0.7853	-	-	0.0105	-1.6137	-1.6137
1069	51208257	Training	5.061	5.0589	-0.0021	5.0589	-0.0021	0.0076	-0.0043	-0.0043
1070	51208258	Training	4.589	5.0725	0.4835	5.0765	0.4875	0.0082	0.9924	1.0006
1071	51208259	Training	4.438	4.6598	0.2218	4.6615	0.2235	0.0079	0.4551	0.4587
1072	51208260	Training	4.859	5.0105	0.1515	5.0128	0.1538	0.0151	0.3119	0.3167
1073	51208261	Training	4.152	4.6129	0.4609	4.6172	0.4652	0.0092	0.9464	0.9553
1074	51208263	Training	4.517	4.4761	-0.0409	4.4757	-0.0413	0.0098	-0.0841	-0.0849
1075	51208265	Training	5.693	5.2395	-0.4535	5.235	-0.458	0.01	-0.9316	-0.941
1076	51247221	Training	5.788	5.1602	-0.6278	5.155	-0.633	0.0083	-1.2885	-1.2993
1077	51260219	Training	7.143	7.7586	0.6156	7.7649	0.6219	0.0102	1.2647	1.2777
1078	51260222	Training	7.155	7.5217	0.3667	7.5317	0.3767	0.0264	0.7597	0.7803
1079	51269442	Training	7.284	6.6981	-0.5859	6.6958	-0.5882	0.0038	-1.2	-1.2045
1080	51269444	Training	6.438	6.7825	0.3445	6.7847	0.3467	0.0062	0.7064	0.7108
1081	51269447	Training	6.69	6.1803	-0.5097	6.1777	-0.5123	0.0051	-1.0445	-1.0499
1082	51269448	Training	7.137	6.7526	-0.3844	6.7511	-0.3859	0.004	-0.7872	-0.7904
1083	51269449	Training	7.041	6.6625	-0.3785	6.6608	-0.3802	0.0046	-0.7755	-0.779
1084	51269450	Training	7.26	6.8797	-0.3803	6.8783	-0.3817	0.0037	-0.7788	-0.7817
1085	51269451	Training	6.192	6.34	0.148	6.3412	0.1492	0.0079	0.3038	0.3062
1086	51269458	Training	7.027	6.8833	-0.1437	6.8824	-0.1446	0.0064	-0.2947	-0.2966
1087	51269459	Training	6.233	6.9264	0.6934	6.9316	0.6986	0.0074	1.4226	1.4332
1088	51269460	Training	7.268	6.5974	-0.6706	6.5947	-0.6733	0.0041	-1.3735	-1.3792
1089	51269462	Training	7.174	6.7827	-0.3913	6.7802	-0.3938	0.0062	-0.8024	-0.8074
1090	51269467	Prediction	7.06	6.8036	-0.2564	-	-	0.0031	-0.525	-0.525
1091	51269468	Training	7.319	6.7621	-0.5569	6.7601	-0.5589	0.0035	-1.1404	-1.1444
1092	51269473	Training	7.018	6.695	-0.323	6.6936	-0.3244	0.0042	-0.6617	-0.6645
1093	51321660	Training	4.367	4.843	0.476	4.8454	0.4784	0.0051	0.9754	0.9804
1094	51321661	Training	4.373	5.1455	0.7725	5.1518	0.7788	0.008	1.5855	1.5983
1095	51321662	Training	4.866	5.2478	0.3818	5.2515	0.3855	0.0097	0.7842	0.7919
1096	51321663	Training	4.621	5.0786	0.4576	5.082	0.461	0.0073	0.9388	0.9457
1097	51321666	Training	4.844	5.1449	0.3009	5.1473	0.3033	0.008	0.6175	0.6225
1098	51321667	Prediction	5.07	5.2455	0.1755	-	-	0.0097	0.3605	0.3605
1099	51321668	Prediction	4.65	5.3118	0.6618	-	-	0.0112	1.3605	1.3605
1100	51321669	Prediction	4.453	5.0786	0.6256	-	-	0.0073	1.2835	1.2835
1101	51321670	Training	4.809	5.2455	0.4365	5.2498	0.4408	0.0097	0.8966	0.9054
1102	51321671	Training	4.262	5.145	0.883	5.1522	0.8902	0.008	1.8123	1.8269
1103	51321673	Training	5.434	5.1449	-0.2891	5.1426	-0.2914	0.008	-0.5933	-0.5981
1104	51321674	Training	5.208	5.0443	-0.1637	5.0432	-0.1648	0.0067	-0.3358	-0.338
1105	51321675	Prediction	4.645	5.0443	0.3993	-	-	0.0067	0.8189	0.8189
1106	51321679	Training	4.552	5.1792	0.6272	5.1849	0.6329	0.0089	1.2878	1.2995
1107	51321680	Training	4.278	5.1455	0.8675	5.1526	0.8746	0.008	1.7805	1.7949
1108	51321681	Training	4.563	5.2455	0.6825	5.2522	0.6892	0.0097	1.4019	1.4156
1109	51321682	Training	4.436	4.9436	0.5076	4.9465	0.5105	0.0057	1.0405	1.0465
1110	51321684	Training	4.816	5.0443	0.2283	5.0458	0.2298	0.0067	0.4682	0.4713
1111	51334751	Training	7.337	6.7239	-0.6131	6.7198	-0.6172	0.0066	-1.2573	-1.2657
1112	51334752	Training	6.529	6.3824	-0.1466	6.3821	-0.1469	0.002	-0.3	-0.3006
1113	51334753	Training	6.772	6.8393	0.0673	6.8397	0.0677	0.0049	0.138	0.1387
1114	51334754	Training	6.78	6.7663	-0.0137	6.7662	-0.0138	0.0039	-0.0282	-0.0283
1115	51334755	Training	7.367	6.565	-0.802	6.5633	-0.8037	0.0022	-1.6411	-1.6447
1116	51334756	Training	7.367	6.5634	-0.8036	6.5616	-0.8054	0.0022	-1.6444	-1.648
1117	51334757	Prediction	7.108	6.4593	-0.6487	-	-	0.0018	-1.3271	-1.3271
1118	51334758	Prediction	7.319	6.7387	-0.5803	-	-	0.0038	-1.1884	-1.1884
1119	51334759	Prediction	7.244	7.2452	0.0012	-	-	0.007	0.0025	0.0025
1120	51334760	Prediction	7.041	7.1446	0.1036	-	-	0.0059	0.2124	0.2124
1121	51334761	Training	7.149	6.5916	-0.5574	6.5902	-0.5588	0.0024	-1.1408	-1.1435
1122	51334762	Prediction	6.815	6.8391	0.0241	-	-	0.0049	0.0493	0.0493
1123	51334763	Training	6.728	6.565	-0.163	6.5647	-0.1633	0.0022	-0.3335	-0.3342
1124	51334764	Training	6.762	6.3621	-0.3999	6.3614	-0.4006	0.0018	-0.8181	-0.8196
1125	51334765	Prediction	6.115	6.6606	0.5456	-	-	0.0028	1.1167	1.1167
1126	51334766	Training	6.754	6.6381	-0.1159	6.6377	-0.1163	0.0031	-0.2373	-0.238
1127	51334767	Training	7.377	6.8313	-0.5457	6.8281	-0.5489	0.0057	-1.1187	-1.1251
1128	51334768	Training	7.276	6.8296	-0.4464	6.8271	-0.4489	0.0057	-0.915	-0.9203
1129	51334769	Training	7.114	6.7256	-0.3884	6.7234	-0.3906	0.0055	-0.7961	-0.8005
1130	51334770	Prediction	7.215	6.9044	-0.3106	-	-	0.006	-0.6369	-0.6369
1131	51334771	Training	6.866	6.565	-0.301	6.5644	-0.3016	0.0022	-0.6159	-0.6172
1132	51334772	Training	6.873	6.6381	-0.2349	6.6374	-0.2356	0.0031	-0.4809	-0.4824
1133	51334773	Training	6.67	6.5627	-0.1073	6.5625	-0.1075	0.0022	-0.2195	-0.22
1134	51334774	Training	6.812	6.5611	-0.2509	6.5605	-0.2515	0.0021	-0.5134	-0.5145
1135	51334775	Training	6.735	6.5577	-0.1773	6.5573	-0.1777	0.0021	-0.3629	-0.3637
1136	51334776	Training	6.762	6.6358	-0.1262	6.6354	-0.1266	0.0031	-0.2583	-0.2591
1137	51334777	Prediction	6.517	6.829	0.312	-	-	0.0057	0.6396	0.6396
1138	51334778	Prediction	6.793	6.8274	0.0344	-	-	0.0057	0.0704	0.0704
1139	51334779	Training	6.75	7.2073	0.4573	7.2102	0.4602	0.0062	0.9377	0.9435
1140	51334780	Training	6.328	6.5627	0.2347	6.5632	0.2352	0.0022	0.4803	0.4813
1141	51340014	Training	4.018	4.8956	0.8776	4.9098	0.8918	0.016	1.8083	1.8378

## Sheet: Correlation Matrix
	pIC50.rounded	fClaroN2B	number of ringC	number of aroC	com_ringChyd_3A	com_ringChyd_5A	aroCplus_sumpc	com_ringChyd_4A	faroCN2B	fringNsp3C5B	aroC_aroN_5B	da_amdN_6B	aroCminus_sumpc
pIC50.rounded	1
fClaroN2B	0.0552	1
number of ringC	0.4773	-0.0723	1
number of aroC	0.4139	-0.036	0.8405	1
com_ringChyd_3A	0.417	-0.0412	0.2233	0.1555	1
com_ringChyd_5A	0.5003	-0.0706	0.5922	0.4201	0.599	1
aroCplus_sumpc	0.3338	0.0421	0.2221	0.3781	0.0392	0.0607	1
com_ringChyd_4A	0.5006	-0.037	0.3491	0.2223	0.7657	0.8407	0.0518	1
faroCN2B	0.6908	-0.056	0.4307	0.3198	0.2902	0.3578	0.1863	0.3231	1
fringNsp3C5B	0.5244	-0.0473	0.1101	-0.0565	0.1419	0.2106	0.1104	0.2221	0.469	1
aroC_aroN_5B	0.6308	0.0087	0.6509	0.7235	0.2281	0.3078	0.4036	0.2188	0.4444	0.1612	1
da_amdN_6B	0.2444	-0.0411	-0.0216	-0.0074	0.0613	0.0303	0.0785	0.0411	0.0863	0.1323	-0.0734	1
aroCminus_sumpc	-0.0753	0.0447	-0.5791	-0.6804	-0.043	-0.2987	0.1679	-0.1077	-0.1721	0.1532	-0.2506	-0.077	1
